## **Spatiotemporal Variability in Dengue Transmission Intensity in Jakarta, Indonesia**

**Authors:** Megan O'Driscoll<sup>1\*</sup>, Natsuko Imai<sup>1</sup>, Neil M. Ferguson<sup>1</sup>, Sri Rezeki Hadinegoro<sup>2</sup>, Hindra Irawan Satari<sup>2</sup>, Clarence C. Tam<sup>3,4</sup>, Ilaria Dorigatti<sup>1</sup>.

### **Author Affiliations:**

1. MRC Centre for Global Infectious Disease Analysis, Department of Infectious Disease Epidemiology, Imperial College London, London, United Kingdom
2. Department of Child Health, Faculty of Medicine Universitas Indonesia, Jakarta, Indonesia
3. Saw Swee Hock School of Public Health, National University of Singapore and National University Health System, Singapore
4. London School of Hygiene & Tropical Medicine, London, United Kingdom.

### **Corresponding author:**

Megan O'Driscoll

Email: [m.odriscoll@imperial.ac.uk](mailto:m.odriscoll@imperial.ac.uk)

## **Abstract**

### **Background**

Approximately 70% of the global burden of dengue disease occurs on the Asian continent, where many large urban centres provide optimal environments for sustained endemic transmission and periodic epidemic cycles. Jakarta, the capital of Indonesia, is a densely populated megacity with hyperendemic dengue transmission. Characterization of the spatiotemporal distribution of dengue transmission intensity is of key importance for optimal implementation of novel control and preventative programmes, including vaccination. In this paper we use mathematical models to provide the first detailed description of spatial and temporal variability in dengue transmission in Jakarta.

### **Methodology/Principal Findings**

We used catalytic models in a Bayesian framework to estimate dengue force of infection and reporting probabilities from age-stratified dengue case-notification data reported in 42 subdistricts of Jakarta. The model was fit to yearly and cumulative data covering a 10-year period between 2008 and 2017. We estimated an average annual transmission intensity of 13.0% (95%CrI: 12.9-13.1%) per year in Jakarta province, ranging from 9.0% (95%CrI: 7.7-10.3%) to 16.4% (95%CrI: 15.3-17.4%) per year across subdistricts during 2008-2017. Annual average transmission intensity in Jakarta province ranged from 11.8% (95%CrI: 10.7-12.9%) in 2011 to 15.9% (95%CrI: 14.8-17.1%) in 2017. We estimate higher reporting probabilities in epidemic years, suggesting that local awareness of dengue transmission likely influenced reporting practices during 2008-2017.

### **Conclusions/Significance**

While the absolute number of dengue case-notifications cannot be relied upon as a measure of endemicity, the age-distribution of reported dengue cases provides valuable insights into the underlying nature of transmission. Our estimates from yearly and cumulative case-notification data represent the first detailed estimates of dengue transmission intensity in Jakarta's subdistricts, which will be important to consider when assessing the population-level impact and cost-effectiveness of potential control and preventative programmes, such as the controlled release of *Wolbachia*-carrying mosquitoes and vaccination, in Jakarta province.

## **Introduction**

Dengue is the most rapidly expanding mosquito-borne viral disease (1). Increased globalization and rapid urbanization continue to facilitate the geographic expansion of the mosquito vector and virus in tropical regions where the frequency and magnitude of dengue epidemics has increased dramatically in the past 40 years (2). Approximately 70% of the global burden of dengue disease occurs on the Asian continent (3), where many large urban centres provide optimal environments for sustained endemic transmission and periodic epidemic cycles.

Indonesia reports the highest number of DHF cases in the WHO Southeast Asia Region (1), though experts acknowledge that case numbers are largely under-reported and that reporting practices vary substantially by region (4). The 1997 World Health Organization (WHO) case definitions are used for dengue reporting in Indonesia, where only dengue haemorrhagic fever (DHF) and dengue shock syndrome (DSS) are notifiable. A cluster-design cross-sectional seroprevalence survey conducted in 2014 estimated an average annual force of infection of 0.140 (95%CI: 0.133-0.147) in urban populations of Indonesia (5). Jakarta, the capital of Indonesia, is a densely populated megacity with endemic transmission of all 4 dengue serotypes and cyclical epidemics every 3-5 years (6,7). Current control strategies in Jakarta focus on the removal of mosquito breeding sites by the Mosquito Nest Eradication Program (Pemberantasan Sarang Nyamuk (PSN)), as well as the periodic use of chemical insecticides for vector management (8).

The characterization of spatial and temporal variability in dengue transmission intensity has become increasingly important in recent years as a way to inform optimal implementation of novel vector control and prevention strategies, including the release of *Wolbachia*-infected mosquitoes and vaccination. The most recent WHO guidelines for use of the world's first dengue vaccine, CYD-TDV (also known as Dengvaxia), recommend a 'test-before-vaccination' approach with serological testing of individuals prior to vaccination (9), thus presenting significant financial and logistical challenges for the implementation of vaccination campaigns. While the implementation of individual-based screening and vaccination programmes may not be feasible at the national-level for many countries, geographically targeted interventions implemented at a sub-national level may present a more realistic and cost-effective option in specific settings. Dengue force of infection, a key measure of transmission intensity, provides valuable insights into the age-related risk of infection and population immunity dynamics. In many dengue endemic countries, routinely collected case-notification surveillance data are often the only available source of data with which to assess dengue transmission intensity. Though the reliability of dengue case-notification data based on clinical diagnoses can vary due to non-specific clinical manifestations caused by dengue

and other vector-borne infections, analysis of the relationship between age and disease incidence can provide valuable insights into the underlying nature and intensity of dengue transmission (10).

The age-related patterns of dengue incidence obtained from reported surveillance data can be attributed to the transmission setting and multiple other factors, including the complex immunological interactions of the four dengue virus serotypes, reporting practices, health-seeking behaviour and surveillance capacities. A large proportion of dengue infections result in mild or no symptoms and infection with any one serotype is thought to provide long-term immunity to the same serotype and a short-lived period of cross-protection against infections with heterologous serotypes (11,12). Severe dengue disease is often, but not always, associated with secondary infections through an immunopathological phenomenon known as antibody-dependent enhancement (ADE), whereby pre-existing anti-DENV antibodies enhance disease severity in secondary heterologous infections (13). Due to cross-reactivity of dengue antibodies in current serological assays, less is known about tertiary and quaternary infections (14) which are thought to cause less symptomatic disease than primary or secondary infections (15). For this reason, most mathematical models of dengue transmission assume clinical protection upon secondary infection (16).

Here we apply catalytic models (10) to provide the first detailed description of spatial and temporal variability in dengue transmission intensity in Jakarta, Indonesia. We estimated dengue transmission intensity and reporting probabilities from age-stratified case-notification data in 42 subdistricts of Jakarta over a 10-year period between 2008 and 2017. These estimates can inform the implementation of future control and preventative programmes.

## **Methods**

### **Data:**

In Jakarta province, cases of dengue haemorrhagic fever (DHF) and dengue shock syndrome (DSS) are both notified as DHF to the Ministry of Health in Jakarta. These publicly available data are reported from public and private hospitals as well as *Puskesmas* (primary healthcare centres) (17). Laboratory confirmation of dengue is uncommon, with diagnoses predominantly based on clinical criteria and basic haematology results (18). Age-stratified case-notification data were collated for the 44 subdistricts (administrative level 3) of Jakarta for the years 2008-2017 (17). DHF cases reported in children <1 year old were excluded from our analyses due to the existence of maternal antibodies which could have potentially predisposed some infants to symptomatic or severe disease (19). Since the life expectancy in Indonesia is approximately 70 years (20), we assumed that cases reported in the age-

group  $\geq 75$  occurred in individuals aged 75-80. We used population age structure data from the Jakarta Open Data website (21) and from the Ministry of National Development Planning (22). The population age structure for Jakarta province was available for 2010 and 2014 (22) and the population age structure at the subdistrict-level was available for the years 2014-2016 (21). From the provincial-level population age structure for 2010 and 2014, we derived average annual age-group specific rates of population change, which were applied to the 2014 subdistrict-level age structures to obtain approximate subdistrict age structures for the years 2010-2013. In the absence of population data before 2010 and after 2016, we assumed the same population age structure observed in 2010 for the years 2008 and 2009 and the same age structure observed in 2016 for the year 2017 across all subdistricts. The yearly population age structures derived for each subdistrict from the available data are given in Supplementary file (S2). The yearly total case numbers and incidence rates of hospitalized DHF for Jakarta province used in this analysis are reported in Table 1 and data by subdistrict are available in Tables S1 and S2 (SI Text). Between 2008 and 2017, over 200,000 hospitalized cases of DHF were reported in Jakarta, which corresponds to an average incidence of 2.07 per 1,000 persons per year. Figure 1 shows the average age-specific incidence of hospitalized DHF averaged over the 10-year period, by region and subdistrict. The Thousand Islands/Kepulauan Seribu regency was omitted from subsequent analyses because case-notification data from this regency, a chain of islands in the Java Sea that are predominantly privately owned, were sparse and because dengue transmission on islands is likely to be more epidemic in nature.

| <b>Year</b>      | <b>Hospitalized DHF cases</b> | <b>Incidence of hospitalized DHF cases per 1,000</b> |
|------------------|-------------------------------|------------------------------------------------------|
| <b>2008</b>      | 27,656                        | 2.980                                                |
| <b>2009</b>      | 27,694                        | 2.984                                                |
| <b>2010</b>      | 28,101                        | 3.027                                                |
| <b>2011</b>      | 10,552                        | 1.115                                                |
| <b>2012</b>      | 11,901                        | 1.234                                                |
| <b>2013</b>      | 18,848                        | 1.917                                                |
| <b>2014</b>      | 17,916                        | 1.789                                                |
| <b>2015</b>      | 11,494                        | 1.128                                                |
| <b>2016</b>      | 38,675                        | 3.753                                                |
| <b>2017</b>      | 7,870                         | 0.764                                                |
| <b>2008-2017</b> | 200,707                       | 2.069                                                |

**Table 1.** Total hospitalized dengue haemorrhagic fever (DHF) cases and corresponding incidence rates in Jakarta province reported by hospitals to the Jakarta Ministry of Health Epidemiological surveillance (17). Data at subdistrict-level are provided in Tables S1 and S2 of the Supplementary Information (SI Text).

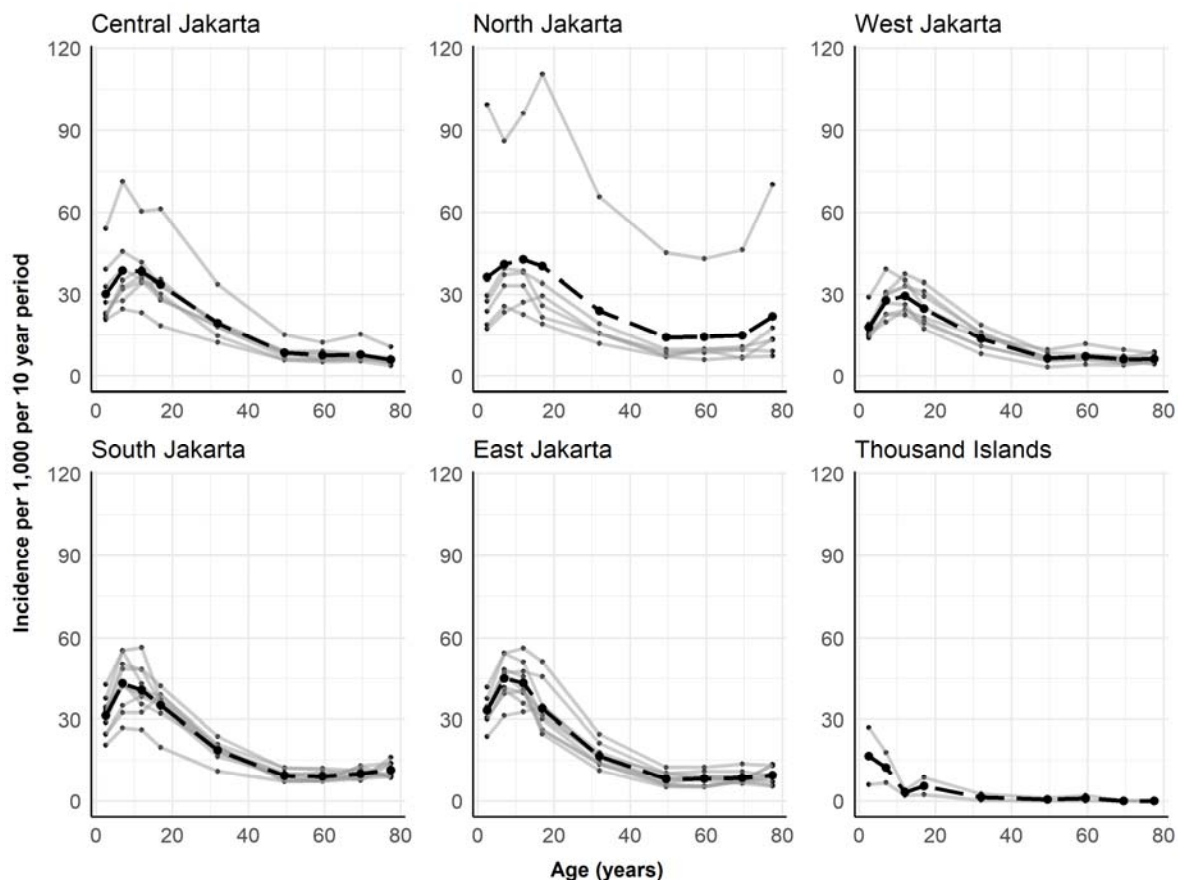

**Figure 1.** Cumulative age-specific incidence of hospitalized dengue haemorrhagic fever (DHF) cases by region and subdistrict for the 10 year period between 2008 and 2017 in Jakarta province. Grey lines show subdistrict age-distributions and black dashed lines show the average age-distribution of hospitalized DHF cases for the region. Dengue case-notification data were obtained from the Jakarta Ministry of Health Epidemiological surveillance system (17). Subdistrict incidence rates and population age structures and are reported in Tables S2 and S3.

#### Model:

We assumed endemic transmission of all four dengue virus serotypes (6) and that infection with any one serotype provides lifelong homotypic immunity. We also assumed that the force

of infection (the average annual rate that susceptible individuals acquire dengue infection) was constant in both age and time and, due to lack of serotype-specific data, that the four dengue serotypes were transmitted with equal intensity. Using the mathematical model described in detail in Imai et al. (10), the incidence of primary infection in age-group  $j$ ,  $I_1(j)$ , is calculated as shown in Equation 1:

$$I_1(j) = \int_{a_j}^{a_{j+1}} 4\lambda(e^{-\lambda a})^4 da$$

[Equation 1]

Equations for the calculation of the incidence of secondary, tertiary and quaternary infections are given in section 2 of the SI. Here  $\lambda$  denotes the force of infection of each individual serotype, with the total force of infection calculated as four times the serotype-specific force of infection (i.e.  $4\lambda$ ).  $a_j$  and  $a_{j+1}$  represent the lower and upper bounds of age-group  $j$ . Assuming clinical protection after secondary infection (i.e. that tertiary and quaternary infections are not symptomatic), the average annual incidence of dengue disease per person in age group  $j$ ,  $D(j)$ , is then calculated as the weighted sum of primary to secondary infection incidence:

$$D(j) = \frac{\rho}{w(j)} (I_2(j) + \gamma_1(I_1(j)) + Bw(j))$$

[Equation 2]

where  $\rho$  denotes the probability that a secondary infection is symptomatic and reported to surveillance,  $w(j)$  is the width of age-group  $j$ ,  $\gamma_1$  is the probability that a primary infection is reported relative to a secondary infection, and  $B$  is the probability of reporting non-dengue illnesses as dengue infections (e.g. due to misdiagnosis). The basic reproduction number ( $R_0$ ) was calculated from the serotype-specific force of infection estimates,  $\lambda$ , under two assumptions (equations shown in section 3.4 of the SI text). Under assumption 1, we assume that all infections (primary to quaternary) contribute to onward transmission; under assumption 2, we assume that only primary and secondary infections are infectious and thus contribute to dengue transmission.

We explored two assumptions about the infections that contribute to the observed disease incidence (in this case, hospitalized DHF cases) and defined two model variants, which we denoted *S* and *PS*. Under model variant *S* we assumed that all hospitalized DHF cases were caused by secondary infections (i.e. we set  $\gamma_1$  to zero). Under model variant *PS* we assumed that hospitalized DHF cases could be caused by primary or secondary infections, where

primary infections were less likely to be symptomatic and reported than secondary infections ( $\gamma_1 < \rho$ ). We assumed that only primary and secondary infections could result in DHF cases (Equation 2) because exploratory analyses on simulated data revealed identifiability issues when estimating the proportion of DHF cases attributed to tertiary and quaternary infections (results not shown).

We used a multinomial log-likelihood (for details see section 3 of the SI), and Markov Chain Monte Carlo (MCMC) methods with a Metropolis-Hastings algorithm for parameter inference. We estimated 3 parameters ( $\lambda$ ,  $\rho$ ,  $B$ ) using model variant *S* and 4 parameters ( $\lambda$ ,  $\rho$ ,  $\gamma_1$ ,  $B$ ) using model variant *PS*, where we assumed a uniform prior on each parameter. We produced long-term, average dengue force of infection estimates by fitting models to provincial and subdistrict cumulative dengue incidence data from the 10-year period (2008-2017). To describe variation in dengue transmission intensity over time we also fit the model to incidence data from individual years between 2008 and 2017 at both province and subdistrict levels. Age-specific seroprevalence estimates were obtained using force of infection estimates as detailed in section 3.3 of the SI Text. The proportion of subdistricts reaching 50%, 70% and 90% seroprevalence at 9 years of age were calculated using average force of infection estimates obtained from the fit of model variant *PS* to cumulative (2008-2017) age-stratified DHF incidence rates in Jakarta's subdistricts.

Spatial autocorrelation of dengue force of infection was assessed using the Moran's I-coefficient and local indicator of spatial association (LISA) metrics. The significance of the Moran's I-coefficient was assessed by a Monte-Carlo permutation test with 1,000 simulations, under the null-hypothesis that subdistrict estimates of dengue force of infection are randomly distributed within the province of Jakarta. Subdistrict population density estimates from the 2010 census, available online (23), were used to assess the relationship between subdistrict population density and the estimated dengue force of infection using a simple linear regression model (full details given in section 3.5 of SI Text).

All analyses were conducted in R statistical software, version 3.4.3 (24).

## **Results**

All parameter estimates and model fits for Jakarta province, obtained using both model variants *S* (assuming all reported hospitalised DHF cases are due to secondary infections) and *PS* (assuming reported hospitalised DHF cases are due to primary and secondary infections), are given in Table S4 and Figure S1 of the SI Text. Model variants *S* and *PS* produced largely similar estimates, particularly when estimates of the probability of primary



infections being reported as DHF cases ( $\gamma_1$ ) are negligible. For years where significantly different estimates of force of infection were produced by models *S* and *PS*, the Deviance Information Criterion (DIC) consistently favoured model *PS* (Table S4). Therefore, in the remainder of the manuscript we focus on the results obtained with model variant *PS*. Estimates from model variant *S* are given in the SI Text. All force of infection estimates quoted in this manuscript refer to the total force of infection from all dengue serotypes (i.e.  $4\lambda$ ).

An average annual force of infection of 0.130 (95%CrI: 0.129-0.131) was estimated for Jakarta province between 2008 and 2017 under model variant *PS*. Model *PS* fit to the cumulative data for Jakarta province produced estimates of the probability of a dengue infection resulting in a reported hospitalized DHF case (reporting rate for secondary infections,  $\rho$ ) of 0.077 (95%CrI: 0.076-0.077), with primary infections being 0.003 (95%CrI: 0.001-0.010) times less likely to result as hospitalized DHF (reporting probability,  $\gamma_1$  relative to  $\rho$ ) (SI, Table S4). During the 10-year period, the annual force of infection in Jakarta province varied by year from 0.115 (95%CrI: 0.105-0.126) in 2015 to 0.159 (95%CrI: 0.148-0.171) in 2017 using model variant *PS* (Table S4 and blue points in Figure 2). We find that reporting probabilities of secondary infections ( $\rho$ ) also varied substantially by year, from 0.024 (95%CrI: 0.022-0.026) in 2017 to 0.179 (95%CrI: 0.176-0.182) in 2016 using model variant *PS* (Table S4 in SI Text). The range of spatiotemporal variation is shown in Figure 2 through the green points, which represent the annual average force of infection estimates obtained at the subdistrict level.

Figure 3 shows the average annual subdistrict force of infection estimates obtained from the fit of model version *PS* to cumulative data for the 10-year period, 2008-2017. We find that during 2008-2017 Sawah Besar subdistrict had the lowest transmission intensity, with an average force of infection of 0.090 (95%CrI: 0.077-0.103) per year while Pasar Rebo experienced the highest average force of infection of 0.163 (95%CrI: 0.153-0.174) per year (see SI Text, Table S5 for full results). Maps of yearly subdistrict force of infection are shown in Supplementary Figure S6. Analysis of spatial autocorrelation of the average annual subdistrict force of infection estimates for the 10-year period under model variant *PS* showed significant spatial clustering of dengue transmission, with a Moran's *I*-coefficient of 0.29 (*p*-value = 0.002). Significant clustering of high transmission intensity subdistricts was observed in central-southeast Jakarta, predominantly in the region of East Jakarta, while spatial clustering of low transmission intensity subdistricts was observed in the region of Central Jakarta (Figure 3 and Figure S5 in SI Text). Using force of infection estimates from model variant *PS* fit to cumulative data from 2008-2017 we observed a weak correlation between subdistrict force of infection and population density (*p*-value=0.086), with population density

explaining approximately 5% (adjusted  $R^2=0.049$ ) of the variability in annual average subdistrict force of infection estimates (Figure S7 in SI Text).

Using the average annual force of infection estimates obtained with model variant *PS* from the 10-year period, we derived the expected proportion of seropositive population by age in Jakarta province and the extent to which this proportion would vary between the highest and lowest transmission intensity subdistricts within Jakarta as shown in Figure 4A. All subdistrict estimates of the proportion of seropositive 9 year olds are given in Supplementary Table S5. At age 9, the expected proportion of seropositive individuals in Jakarta province is 68.9% (95%CrI: 68.6-69.3) ranging from 55.6% (95%CrI: 50.2-60.4) to 77.1% (95%CrI: 74.8-79.1) across subdistricts. By age 15, this proportion is expected to have risen to 85.8% (95%CrI: 85.5-86.0) for the entire province, ranging from 74.2 (95%CrI: 68.7-78.7) to 91.4 (95%CrI: 89.9-92.7) across subdistricts. Figure 4B shows the expected proportion of subdistricts that reach 50%, 70% and 90% seroprevalence by age. We find that 100% (42/42) of subdistricts in Jakarta are expected to have at least 50% seroprevalence amongst 9 year olds, and 38% (16/42) are expected to have seroprevalence levels above 70% at this age. At age 15, all subdistricts (42/42) are expected to have seroprevalence levels of at least 70%, with 12% (5/42) of subdistricts expected to have seroprevalence levels of 90% or more in this age group.

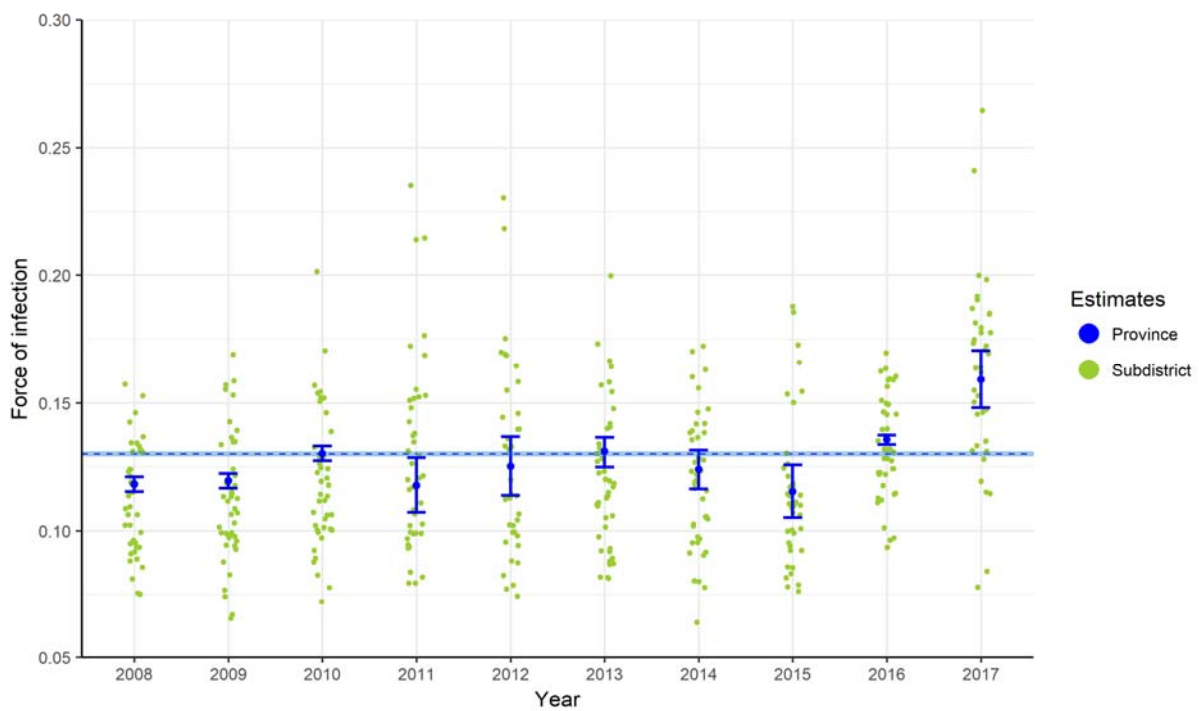

**Figure 2.** Total force of infection ( $4\lambda$ ) estimates obtained from the fit of model variant *PS* (assuming reported hospitalised DHF cases are caused by primary or secondary infections) to annual DHF cases reported between 2008 and 2017. Blue points show the median and 95% credible interval of the estimates obtained for the whole province of Jakarta. Green points represent the yearly median estimates obtained at the subdistrict level. The dashed blue horizontal line and shading represents the median and 95% credible interval of the average annual force of infection estimate obtained by fitting model *PS* to cumulative DHF case data reported over the entire 10-year period, 2008-2017. For illustrative purposes the y-axis was capped at 0.30, though a few annual subdistricts had higher estimates of force of infection (annual subdistrict parameter estimates are available in S3 Supplementary File).

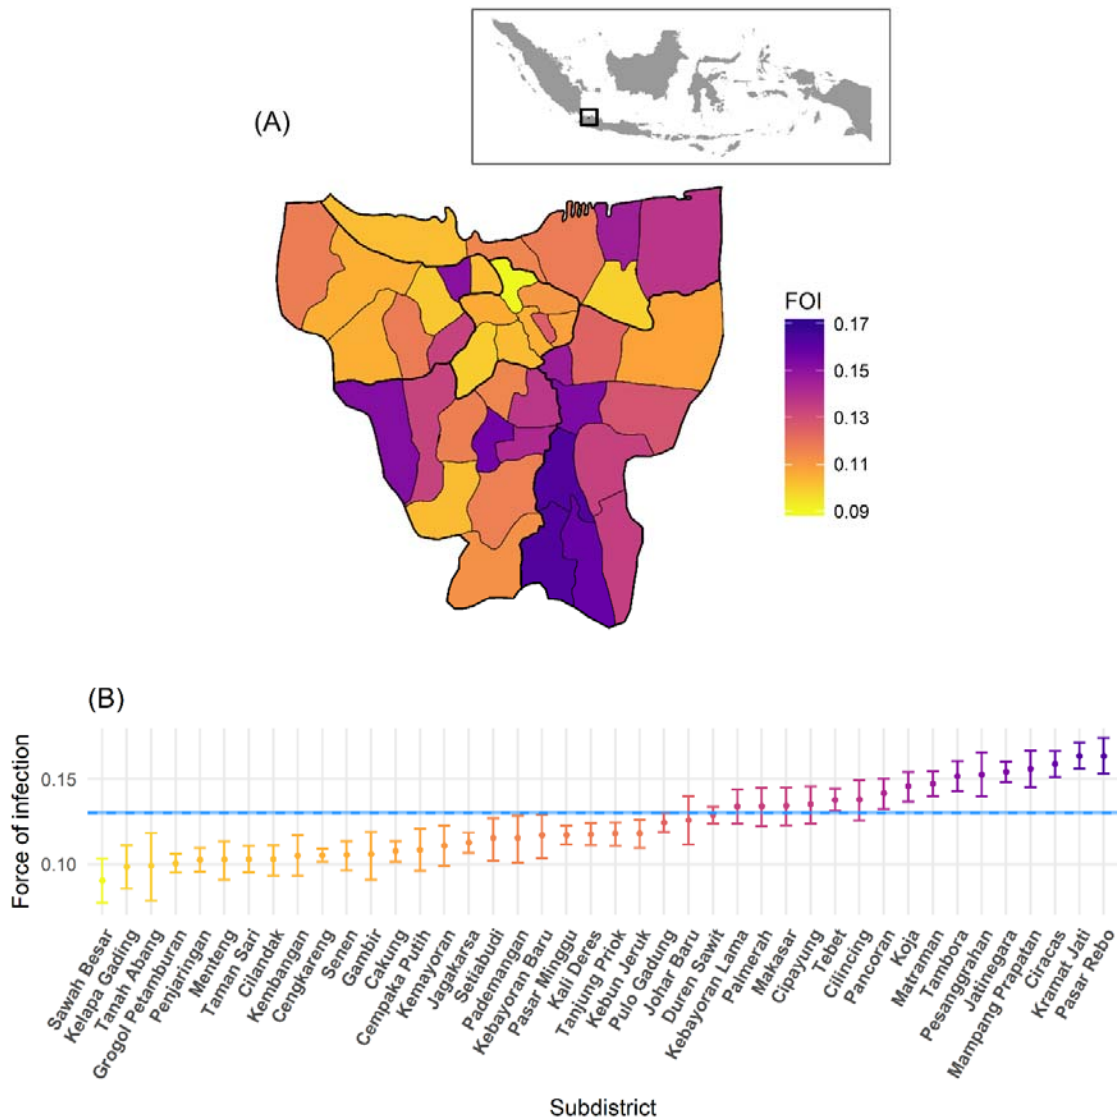

**Figure 3.** Spatial variation in average annual total dengue force of infection ( $4\lambda$ ) estimates in Jakarta obtained from the fit of model variant *PS* (assuming reported hospitalised DHF cases are caused by primary or secondary infections) to cumulative hospitalised DHF data reported in 2008-2017. (A) Map of median force of infection estimates per subdistrict with grey panel showing the location of Jakarta in Indonesia; (B) median and 95% credible interval of the estimates reported in panel A. Blue dashed line and shading shows the median and 95% credible interval province-level average annual force of infection in 2008-2017. FOI: force of infection.

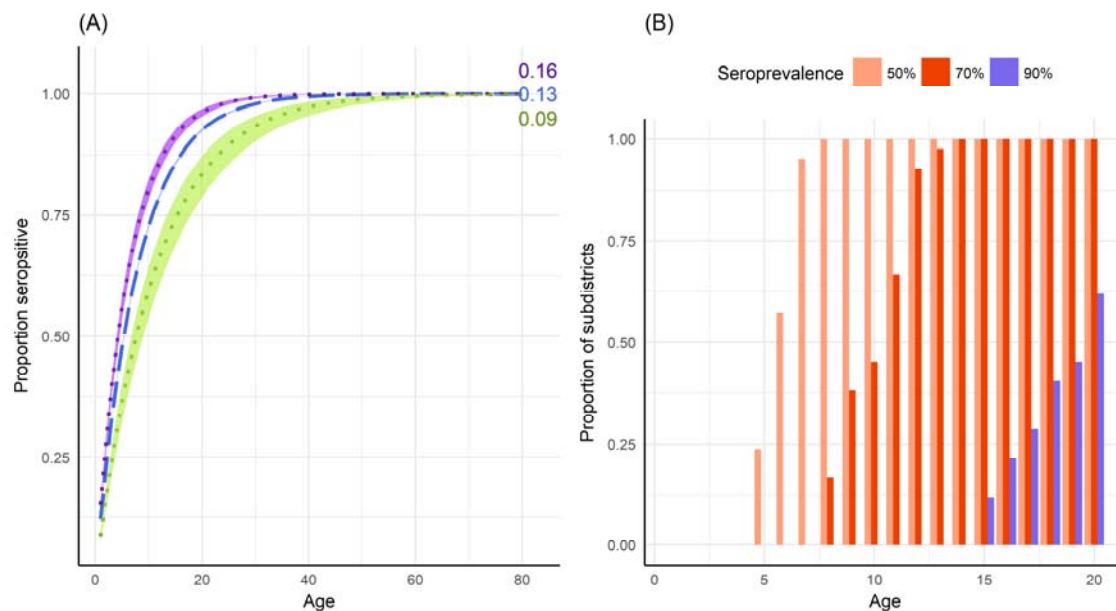

**Figure 4.** Expected seroprevalence levels in Jakarta province. (A) Expected proportion (median and 95% credible interval) of the population seropositive to dengue by age using the total force of infection ( $4\lambda$ ) estimate obtained from the fit of model variant *PS* (assuming all hospitalised DHF cases are caused by primary or secondary infections) to cumulative hospitalised DHF data reported in years 2008-2017 in Jakarta province (blue dashed line); Sawah Besar, the subdistrict with the lowest force of infection estimate (green); and Pasar Rebo, the subdistrict with the highest force of infection estimate (purple). The corresponding average force of infection estimate is given at the end of each line. (B) The proportion of subdistricts ( $N=42$ ) in Jakarta province that reach at least 50%, 70% and 90% seroprevalence by age, obtained from subdistrict force of infection estimates using model variant *PS* fit to cumulative hospitalised DHF data reported in years 2008-2017.

## **Discussion**

We find that the force of infection estimate obtained with model variant *PS* fit to cumulative case-notification data reported between 2008 and 2017 in Jakarta province (0.130 (95%CrI: 0.129-0.131)) is similar to the estimate obtained from seroprevalence data collected in 2014 in 30 urban subdistricts of Indonesia (0.14 (95%CI: 0.133-0.147)) (5,25). We observed significant spatiotemporal heterogeneity in force of infection within Jakarta province, with long-term spatial clustering of both high and low transmission intensity subdistricts. Our analysis identified a hot-spot of dengue transmission in the southeast of Jakarta province and clustering of low transmission intensity in the region of Central Jakarta. Subdistrict population density was found to have a weak association with dengue transmission intensity, explaining approximately 5% of the variation (adjusted  $R^2$ ) in subdistrict force of infection estimates during the period of 2008-2017, with higher average annual force of infection associated with greater population densities (for details see SI sections 3.5 and Figure S8). Though this association may suggest higher rates of human-vector contact in densely populated areas, numerous other environmental, socioeconomic and behavioural factors not included in this analysis are likely to influence local transmission intensity.

Annual transmission intensity estimates for Jakarta province during 2008-2017 ranged from 0.115 (95%Cr: 0.105-0.126) in 2015 to 0.159 (0.148-0.171) in 2017, with large heterogeneity at the subdistrict level. This temporal variability in annual dengue force of infection means that the expected proportion of dengue-naïve children in any one age-group also varies by year which, coupled with complex immunological factors, such as antibody-dependent enhancement, will shape the risk of severe dengue in children in any given year. Results from recent analyses of a longitudinal study conducted in Thailand found a significant cohort effect on the proportion of 9 year olds who were dengue-naïve by study year, with up to a twofold difference in the probability of being dengue-naïve depending on year (26). When assessing the level of dengue transmission from case-notification data, it is therefore important to consider data from multiple years in order to obtain reliable long-term estimates of average transmission intensity which will hold relevance for public health policy decision-makers.

Baseline reporting probabilities in Jakarta province varied by year, with the highest reporting probability ( $\rho$ ) of 0.179 (95%CrI: 0.176-0.182) estimated in 2016, the year in which a significant outbreak occurred, and the lowest reporting probability of 0.024 (95%CrI: 0.022-0.026) estimated the following year. These results suggest that local awareness of dengue transmission may play a role in the diagnosis and reporting of dengue cases, with increased reporting probabilities occurring in epidemic years. This variation in dengue reporting practices over time, as well as across different administrative units, means that absolute

dengue case numbers are not always representative of the intensity of dengue transmission. As an example, in Kelapa Gading, the subdistrict with the highest average incidence of DHF cases reported throughout 2008-2017 (6.94 cases per 1,000 population, per year), we estimate one of the lowest transmission intensity estimates in the province of 0.098 (95%CrI: 0.086-0.111). This illustrates the importance of using mathematical models to analyze the age distribution of dengue cases, rather than absolute case numbers, to assess local levels of transmission intensity and, in turn, evaluate the potential impact of interventions such as the implementation of vaccination campaigns.

Recent studies (27,28) have demonstrated that vaccination campaigns with the CYD-TDV vaccine could produce negative impacts in low-to-medium transmission intensity settings, highlighting the importance of tailoring control and preventative programmes to the local setting. While the World Health Organization (WHO) initially advised that countries with geographic settings reaching at least 70% seroprevalence by 9 years of age could consider CYD-TDV vaccination (29), recent new data from Sanofi Pasteur (30,31) produced a change in the vaccine recommendations, with CYD-TDV vaccination currently advised only among subjects  $\geq 9$  years of age with evidence of a previous dengue infection (9,32). Though temporal variability in force of infection means that the proportion of seropositive individuals in any one age-group will also vary by year, our estimates from cumulative data for the 10-year period represent long-term averages in transmission intensity. Using these estimates we expect average seroprevalence levels of 59.1% (95%CrI: 58.7-59.4), 78.6% (95%CrI: 78.3-78.9) and 88.8% (95%CrI: 88.6-89.0), in the 5-9, 10-14 and 15-19 age-groups, respectively, in Jakarta province. Additionally, we expect every subdistrict in Jakarta to have seroprevalence levels of at least 50% amongst 9 year olds, suggesting that across all subdistricts, at least one in every two 9 year olds that are serologically screened would be eligible for vaccination. The age-specific seroprevalence estimates presented in this study can inform potential future individual-based serological screening programmes, to determine the proportion of screened individuals that would be eligible for vaccination.

Overall, we find that the *S* and *PS* model variants produce largely similar estimates of average force of infection, except for years when substantial proportions of DHF cases are estimated to be caused by primary infections ( $\nu_1$ ). For these years, as expected, model variant *S* estimates a higher force of infection than model variant *PS*, due to the assumption that all DHF cases have experienced two infections. Further, though we allow post-secondary infections to contribute to transmission, we assumed that they do not cause severe disease. This assumption was due to potential identifiability issues encountered in the analysis of simulated data when assuming that tertiary and quaternary infections can result in severe cases (results not shown). Though post-secondary infections are thought to



be largely asymptomatic due to long-term heterotypic immunity, if a considerable proportion of severe dengue cases were being caused by tertiary or quaternary infections (perhaps in older individuals whose cross-protective immunity had waned) our model could potentially underestimate the force of infection. As shown in (14), a low age of seroconversion and a high age of DHF are easier to reconcile when relaxing the assumption of clinical protection after secondary infection, which is important to consider given the high occurrence of post-secondary infections observed in hyperendemic regions of Indonesia (33) as well as the increasing average age of DHF cases that has been observed in the country (34).

There are potential limitations in the assumptions and models adopted in this analysis. Our models assume endemic dengue transmission, i.e. that transmission is at a stable equilibrium, which does not hold true during epidemic periods. In 2016 for instance a significant dengue outbreak occurred in Jakarta, for which our model could not entirely reproduce the high rates of disease observed in the 10-14 years age-group (Figure S1 in the SI Text). It is therefore likely that the estimates produced in this analysis underestimated the actual force of infection that year. When estimating transmission intensity within administratively-defined boundaries, we inherently assumed that cases reported in any one administrative unit were also infected in that same administrative unit, which is less realistic at small administrative levels such as subdistricts. In addition, dengue transmission in Jakarta has a distinct seasonal pattern, with case numbers typically peaking in March through May, following the rainy season (35). In this analysis we assumed that the force of infection is constant in time, ignoring intra-annual variability and thus producing average annual transmission intensity estimates. Long-term estimates of transmission intensity, however, will hold relevance to decisions when considering the implementation of future control and preventative programmes.

In conclusion, using publicly available data on DHF cases reported in Jakarta in the 10-year period of 2008-2017, we have presented the first detailed analysis of the spatiotemporal variation in dengue transmission intensity conducted to date in Jakarta province. This study highlights the importance of estimating dengue transmission intensity from the analysis of age-stratified dengue case-notification data rather than inferring it from the absolute number of cases, which can often be misleading. The estimates presented in this study will provide invaluable insights into the potential impact and cost-effectiveness of future control and preventative programmes, including vaccination with current or future dengue vaccines, and the use of the *Wolbachia* technology, in the province of Jakarta.

## **Funding**

We acknowledge grant funding support from the Medical Research Council (Centre grant MR/R015600/1 - NMF, NI, MO'D, ID), the Imperial College Junior Research Fellowship Scheme (ID), the National Institute of General Medical Science MIDAS initiative (grant 5U01GM110721 - NMF) and the Bill and Melinda Gates Foundation (grant OPP1092240 – NMF, NI, MO'D, ID). The funders had no role in study design, data analysis, decision to publish, or preparation of the manuscript.

## **Author Contributions**

MO'D, ID, NI and NMF developed the analysis plan. MO'D conducted the analysis and wrote the paper. ID, NI and NMF supervised the project. MO'D, ID, NI, NMF, CCT, HIS, SRH contributed to the interpretation of the results and critical review of the manuscript.

## **Data Availability**

All data used in this analysis are reported in the tables and figures of the manuscript and supporting information or are publicly available online.

## **Competing Interests**

SRH and HIS have been clinical trial and/or study investigators for, and received associated payments from, Sanofi Pasteur, a company involved in the development of dengue vaccines.

## **References**

1. World Health Organization. Global Strategy for Dengue Prevention and Control 2012-2020 [Internet]. [cited 2017 Aug 22]. Available from: [www.who.int/neglected\\_diseases/en](http://www.who.int/neglected_diseases/en)
2. Gubler DJ. Dengue, Urbanization and Globalization: The Unholy Trinity of the 21(st) Century. *Trop Med Health* [Internet]. 2011 Dec [cited 2017 Jul 4];39(4 Suppl):3–11. Available from: <http://www.ncbi.nlm.nih.gov/pubmed/22500131>
3. Bhatt S, Gething PW, Brady OJ, Messina JP, Farlow AW, Moyes CL, et al. The global distribution and burden of dengue. *Nature* [Internet]. 2013 Apr 7 [cited 2017 Jul 4];496(7446):504–7. Available from: <http://www.nature.com/doi/10.1038/nature12060>
4. WAHYONO TYM, NEALON J, BEUCHER S, PRAYITNO A, MOUREAU A, NAWAWI S, et al. Indonesian dengue burden estimates: review of evidence by an expert panel. *Epidemiol Infect* [Internet]. 2017 May 26 [cited 2017 Jul 3];1–6. Available from: [https://www.cambridge.org/core/product/identifier/S0950268817001030/type/journal\\_article](https://www.cambridge.org/core/product/identifier/S0950268817001030/type/journal_article)
5. Prayitno A, Taurel A-F, Nealon J, Satari HI, Karyanti MR, Sekartini R, et al. Dengue seroprevalence and force of primary infection in a representative population of urban dwelling Indonesian children. *G?rtler RE, editor. PLoS Negl Trop Dis* [Internet]. 2017 Jun 15 [cited 2017 Jul 4];11(6):e0005621.



Available from: <http://dx.plos.org/10.1371/journal.pntd.0005621>

6. Suwandono A, Kosasih H, Nurhayati, Kusriastuti R, Harun S, Ma'roef C, et al. Four dengue virus serotypes found circulating during an outbreak of dengue fever and dengue haemorrhagic fever in Jakarta, Indonesia, during 2004. *Trans R Soc Trop Med Hyg* [Internet]. 2006 Sep [cited 2018 Feb 6];100(9):855–62. Available from: <https://academic.oup.com/trstmh/article-lookup/doi/10.1016/j.trstmh.2005.11.010>
7. Dewi BE, Naiggolan L, Putri DH, Rachmayanti N, Albar S, Indriastuti NT, et al. CHARACTERIZATION OF DENGUE VIRUS SEROTYPE 4 INFECTION IN JAKARTA, INDONESIA. 2014 [cited 2018 Apr 12];45(1). Available from: <http://www.tm.mahidol.ac.th/seameo/2014-45-1-full/09-5957-30.pdf>
8. Hamid PH, Prastowo J, Ghiffari A, Taubert A, Hermosilla C. *Aedes aegypti* resistance development to commonly used insecticides in Jakarta, Indonesia. Hwang J-S, editor. *PLoS One* [Internet]. 2017 Dec 18 [cited 2018 Apr 27];12(12):e0189680. Available from: <http://dx.plos.org/10.1371/journal.pone.0189680>
9. WHO | Revised SAGE recommendation on use of dengue vaccine [Internet]. WHO. World Health Organization; 2018 [cited 2018 Jun 5]. Available from: [http://www.who.int/immunization/diseases/dengue/revised\\_SAGE\\_recommendations\\_dengue\\_vaccines\\_apr2018/en/](http://www.who.int/immunization/diseases/dengue/revised_SAGE_recommendations_dengue_vaccines_apr2018/en/)
10. Imai N, Dorigatti I, Cauchemez S, Ferguson NM. Estimating Dengue Transmission Intensity from Case-Notification Data from Multiple Countries. *PLoS Negl Trop Dis* [Internet]. 2016 Jul [cited 2017 Jul 10];10(7):e0004833. Available from: <http://www.ncbi.nlm.nih.gov/pubmed/27399793>
11. Halstead SB. Dengue. *Lancet* [Internet]. 2007 Nov 10 [cited 2018 May 3];370(9599):1644–52. Available from: <https://www.sciencedirect.com/science/article/pii/S0140673607616870?via%3Dihub>
12. Clapham HE, Cummings DAT, Johansson MA. Immune status alters the probability of apparent illness due to dengue virus infection: Evidence from a pooled analysis across multiple cohort and cluster studies. de Silva AM, editor. *PLoS Negl Trop Dis* [Internet]. 2017 Sep 27 [cited 2018 Apr 27];11(9):e0005926. Available from: <http://dx.plos.org/10.1371/journal.pntd.0005926>
13. Katzelnick LC, Gresh L, Halloran ME, Mercado JC, Kuan G, Gordon A, et al. Antibody-dependent enhancement of severe dengue disease in humans. *Science* [Internet]. 2017 Nov 17 [cited 2018 Apr 27];358(6365):929–32. Available from: <http://www.ncbi.nlm.nih.gov/pubmed/29097492>
14. Wikramaratna PS, Simmons CP, Gupta S, Recker M. The effects of tertiary and quaternary infections on the epidemiology of dengue. *PLoS One* [Internet]. 2010 Aug 23 [cited 2018 Feb 26];5(8):e12347. Available from: <http://www.ncbi.nlm.nih.gov/pubmed/20808806>
15. Olkowski S, Forshey BM, Morrison AC, Rocha C, Vilcarromero S, Halsey ES, et al. Reduced risk of disease during postsecondary dengue virus infections. *J Infect Dis* [Internet]. 2013 Sep [cited 2018 May 8];208(6):1026–33. Available from: <http://www.ncbi.nlm.nih.gov/pubmed/23776195>
16. Andraud M, Hens N, Marais C, Beutels P. Dynamic Epidemiological Models for Dengue Transmission: A Systematic Review of Structural Approaches. Nishiura H, editor. *PLoS One* [Internet]. 2012 Nov 6 [cited 2018 Jun 12];7(11):e49085. Available from: <http://dx.plos.org/10.1371/journal.pone.0049085>
17. Subdin Kesehatan Masyarakat, Seksi Surveilans Epidemiologi [Internet]. [cited 2018 Feb 2]. Available from: <http://www.surveilans-dinkesdki.net/>
18. Nealon J, Taurel A-F, Capeding MR, Tran NH, Hadinegoro SR, Chotpitayasunondh T, et al. Symptomatic Dengue Disease in Five Southeast Asian Countries: Epidemiological Evidence from a Dengue Vaccine Trial. Gubler DJ, editor. *PLoS Negl Trop Dis* [Internet]. 2016 Aug 17 [cited 2017 Jul 4];10(8):e0004918. Available from: <http://dx.plos.org/10.1371/journal.pntd.0004918>
19. Chau TNB, Hieu NT, Anders KL, Wolbers M, Lien LB, Hieu LTM, et al. Dengue Virus Infections and Maternal Antibody Decay in a Prospective Birth Cohort Study of Vietnamese Infants. *J Infect Dis* [Internet]. 2009 Dec 15 [cited 2018 Jan 22];200(12):1893–900. Available from:

<https://academic.oup.com/jid/article-lookup/doi/10.1086/648407>

20. WHO | Indonesia. WHO [Internet]. 2018 [cited 2018 Jul 10]; Available from: <http://www.who.int/countries/idn/en/>
21. Jakarta Open Data [Internet]. [cited 2018 Feb 2]. Available from: <http://118.97.66.109/lv/>
22. Proyeksi Penduduk Indonesia Indonesia Population Projection [Internet]. 2010 [cited 2018 Apr 25]. Available from: [https://www.bappenas.go.id/files/5413/9148/4109/Proyeksi\\_Penduduk\\_Indonesia\\_2010-2035.pdf](https://www.bappenas.go.id/files/5413/9148/4109/Proyeksi_Penduduk_Indonesia_2010-2035.pdf)
23. City Population Statistics [Internet]. [cited 2017 Jul 4]. Available from: <http://www.citypopulation.de/Indonesia.html>
24. R Core Team RDCT. R: The R Project for Statistical Computing [Internet]. [cited 2018 Aug 15]. Available from: <https://www.r-project.org/>
25. Tam CC, O'Driscoll M, Taurel A-F, Nealon J, Hadinegoro SR. Geographic variation in dengue seroprevalence and force of infection in the urban paediatric population of Indonesia. Horstick O, editor. PLoS Negl Trop Dis [Internet]. 2018 Nov 2 [cited 2018 Nov 8];12(11):e0006932. Available from: <http://dx.plos.org/10.1371/journal.pntd.0006932>
26. Salje H, Cummings DAT, Rodriguez-Barraquer I, Katzelnick LC, Lessler J, Klungthong C, et al. Reconstruction of antibody dynamics and infection histories to evaluate dengue risk. Nature [Internet]. [cited 2018 May 25]; Available from: <https://www.nature.com/articles/s41586-018-0157-4.pdf>
27. Ferguson NM, Rodríguez-Barraquer I, Dorigatti I, Mier-Y-Teran-Romero L, Laydon DJ, Cummings DAT. Benefits and risks of the Sanofi-Pasteur dengue vaccine: Modeling optimal deployment. Science [Internet]. 2016 Sep 2 [cited 2017 Dec 18];353(6303):1033–6. Available from: <http://www.ncbi.nlm.nih.gov/pubmed/27701113>
28. Flasche S, Jit M, Rodríguez-Barraquer I, Coudeville L, Recker M, Koelle K, et al. The Long-Term Safety, Public Health Impact, and Cost-Effectiveness of Routine Vaccination with a Recombinant, Live-Attenuated Dengue Vaccine (Dengvaxia): A Model Comparison Study. von Seidlein L, editor. PLOS Med [Internet]. 2016 Nov 29 [cited 2017 Jul 4];13(11):e1002181. Available from: <http://dx.plos.org/10.1371/journal.pmed.1002181>
29. Summary of the April 2016 meeting of the Strategic Advisory Group of Experts on immunization (SAGE). [Internet]. [cited 2017 Jul 4]. Available from: [http://www.who.int/immunization/sage/meetings/2016/april/SAGE\\_April\\_2016\\_Meeting\\_Web\\_summary.pdf](http://www.who.int/immunization/sage/meetings/2016/april/SAGE_April_2016_Meeting_Web_summary.pdf)
30. Sridhar S, Luedtke A, Langevin E, Zhu M, Bonaparte M, Machabert T, et al. Effect of Dengue Serostatus on Dengue Vaccine Safety and Efficacy. N Engl J Med [Internet]. 2018 Jun 13 [cited 2018 Jul 11];NEJMoa1800820. Available from: <http://www.nejm.org/doi/10.1056/NEJMoa1800820>
31. Sanofi - Sanofi updates information on dengue vaccine - Sanofi [Internet]. [cited 2018 Jul 11]. Available from: <https://mediaroom.sanofi.com/en/press-releases/2017/sanofi-updates-information-on-dengue-vaccine/>
32. WHO | Updated Questions and Answers related to the dengue vaccine Dengvaxia® and its use. WHO [Internet]. 2018 [cited 2018 Jul 11]; Available from: [http://www.who.int/immunization/diseases/dengue/q\\_and\\_a\\_dengue\\_vaccine\\_dengvaxia\\_use/en/](http://www.who.int/immunization/diseases/dengue/q_and_a_dengue_vaccine_dengvaxia_use/en/)
33. Graham RR, Tan R, Hayes CG, Laksono I, Ma 'roef C, Porter KR, et al. A PROSPECTIVE SEROEPIDEMIOLOGIC STUDY ON DENGUE IN CHILDREN FOUR TO NINE YEARS OF AGE IN YOGYAKARTA. Am J Trop Med Hyg Indones I Stud [Internet]. 1999 [cited 2018 May 16];61(3):412–9. Available from: <http://www.ajtmh.org/docserver/fulltext/14761645/61/3/10497982.pdf?expires=1526466441&id=id&ccname=guest&checksum=130098D94E647423EFE1B139BA3B9396>
34. Karyanti MR, Uiterwaal CSPM, Kusriastuti R, Hadinegoro SR, Rovers MM, Heesterbeek H, et al. The changing incidence of Dengue Haemorrhagic Fever in Indonesia: a 45-year registry-based analysis.

BMC Infect Dis [Internet]. 2014 Dec 26 [cited 2018 Feb 5];14(1):412. Available from: <http://bmcinfectdis.biomedcentral.com/articles/10.1186/1471-2334-14-412>

35. Lawpoolsri S, Sitepu MS, Kaewkungwal J, Lupterdlop N, Soonthornworasiri N, Silawan T, et al. TEMPORAL PATTERNS AND A DISEASE FORECASTING MODEL OF DENGUE HEMORRHAGIC FEVER IN JAKARTA BASED ON 10 YEARS OF SURVEILLANCE DATA. *Southeast Asian J trop Med public Heal* [Internet]. 2013 [cited 2018 May 11];206(2). Available from: <http://www.tn.mahidol.ac.th/seameo/2013-44-2-full/10-5657-16.pdf>



## Supporting Information

### 1. DHF case-notification data reported in Jakarta.

**Table S1.** Annual number of hospitalized DHF cases per subdistrict between 2008 and 2017, excluding cases in infants <1 year. Available online at (1).

| Subdistrict         | 2008  | 2009  | 2010  | 2011 | 2012 | 2013  | 2014  | 2015  | 2016  | 2017 | 2008-2017 |
|---------------------|-------|-------|-------|------|------|-------|-------|-------|-------|------|-----------|
| Cakung              | 1,608 | 1,618 | 1,353 | 439  | 494  | 1,137 | 611   | 462   | 1,556 | 434  | 9,712     |
| Cempaka Putih       | 602   | 640   | 586   | 187  | 160  | 221   | 188   | 133   | 445   | 100  | 3,262     |
| Cengkareng          | 704   | 378   | 1,176 | 367  | 453  | 676   | 856   | 592   | 3157  | 418  | 8,777     |
| Cilandak            | 764   | 705   | 692   | 187  | 262  | 407   | 406   | 178   | 502   | 56   | 4,159     |
| Cilincing           | 535   | 1,040 | 730   | 390  | 368  | 412   | 404   | 464   | 975   | 280  | 5,598     |
| Cipayung            | 467   | 520   | 677   | 225  | 314  | 542   | 446   | 284   | 1227  | 225  | 4,927     |
| Ciracas             | 478   | 657   | 535   | 217  | 333  | 451   | 416   | 257   | 1071  | 196  | 4,611     |
| Duren Sawit         | 2,015 | 1,557 | 1,595 | 677  | 655  | 1,113 | 911   | 639   | 1905  | 499  | 11,566    |
| Gambir              | 272   | 196   | 239   | 99   | 112  | 146   | 150   | 102   | 307   | 62   | 1,685     |
| Grogol Petamburan   | 620   | 444   | 482   | 163  | 288  | 460   | 622   | 257   | 794   | 135  | 4,265     |
| Jagakarsa           | 674   | 834   | 754   | 207  | 398  | 650   | 664   | 414   | 1,642 | 277  | 6,514     |
| Jatinegara          | 960   | 842   | 877   | 274  | 282  | 528   | 456   | 229   | 1,196 | 331  | 5,975     |
| Johar Baru          | 405   | 375   | 538   | 134  | 150  | 139   | 153   | 86    | 360   | 80   | 2,420     |
| Kali Deres          | 383   | 181   | 540   | 224  | 303  | 409   | 530   | 379   | 1,820 | 251  | 5,020     |
| Kebayoran Baru      | 430   | 516   | 505   | 161  | 240  | 356   | 395   | 247   | 810   | 149  | 3,809     |
| Kebayoran Lama      | 961   | 871   | 894   | 345  | 428  | 447   | 527   | 288   | 1127  | 264  | 6,152     |
| Kebun Jeruk         | 911   | 764   | 749   | 200  | 191  | 218   | 260   | 130   | 432   | 92   | 3,947     |
| Kelapa Gading       | 712   | 1,210 | 856   | 448  | 371  | 1,311 | 1,248 | 1,452 | 1,093 | 191  | 8,892     |
| Kemayoran           | 772   | 782   | 845   | 303  | 294  | 518   | 583   | 303   | 795   | 151  | 5,346     |
| Kembangan           | 399   | 437   | 704   | 207  | 253  | 415   | 519   | 192   | 641   | 106  | 3,873     |
| Kep. Seribu Selatan | 0     | 2     | 2     | 12   | 8    | 4     | 8     | 13    | 10    | 5    | 64        |
| Kep. Seribu Utara   | 1     | 5     | 1     | 0    | 4    | 0     | 3     | 3     | 7     | 0    | 24        |
| Koja                | 737   | 1,137 | 896   | 488  | 386  | 377   | 443   | 385   | 1,153 | 290  | 6,292     |
| Kramat Jati         | 810   | 643   | 786   | 258  | 332  | 495   | 481   | 253   | 1,188 | 237  | 5,483     |
| Makasar             | 537   | 458   | 523   | 228  | 269  | 359   | 389   | 261   | 793   | 228  | 4,045     |
| Mampang Prapatan    | 616   | 552   | 431   | 105  | 154  | 311   | 299   | 146   | 638   | 114  | 3,366     |
| Matraman            | 681   | 706   | 736   | 211  | 198  | 258   | 225   | 153   | 659   | 130  | 3,957     |
| Menteng             | 331   | 220   | 254   | 91   | 95   | 126   | 112   | 62    | 228   | 54   | 1,573     |
| Pademangan          | 301   | 362   | 391   | 213  | 198  | 272   | 238   | 127   | 552   | 109  | 2,763     |
| Palmerah            | 711   | 565   | 429   | 258  | 360  | 457   | 255   | 154   | 586   | 168  | 3,943     |
| Pancoran            | 663   | 716   | 655   | 120  | 192  | 409   | 357   | 233   | 557   | 97   | 3,999     |
| Pasar Minggu        | 1,383 | 1,257 | 1,070 | 318  | 408  | 634   | 787   | 337   | 1,383 | 322  | 7,899     |
| Pasar Rebo          | 327   | 490   | 451   | 288  | 388  | 417   | 348   | 176   | 926   | 207  | 4,018     |
| Penjaringan         | 596   | 592   | 522   | 314  | 331  | 556   | 571   | 169   | 1104  | 146  | 4,901     |

|                               |               |               |               |               |               |               |               |               |               |              |                |
|-------------------------------|---------------|---------------|---------------|---------------|---------------|---------------|---------------|---------------|---------------|--------------|----------------|
| Pesanggrahan                  | 305           | 419           | 448           | 120           | 175           | 339           | 388           | 176           | 722           | 109          | 3,201          |
| Pulo Gadung                   | 959           | 1,089         | 827           | 271           | 436           | 793           | 482           | 344           | 1,454         | 428          | 7,083          |
| Sawah Besar                   | 332           | 325           | 373           | 170           | 149           | 174           | 162           | 101           | 466           | 75           | 2,327          |
| Senen                         | 452           | 385           | 392           | 127           | 115           | 194           | 137           | 69            | 284           | 40           | 2,195          |
| Setiabudi                     | 382           | 335           | 367           | 164           | 135           | 244           | 166           | 65            | 440           | 74           | 2,372          |
| Taman Sari                    | 314           | 325           | 347           | 139           | 143           | 157           | 157           | 75            | 318           | 37           | 2,012          |
| Tambora                       | 428           | 366           | 375           | 181           | 207           | 252           | 282           | 221           | 531           | 127          | 2,970          |
| Tanah Abang                   | 233           | 200           | 311           | 133           | 175           | 226           | 210           | 105           | 484           | 98           | 2,175          |
| Tanjung Priok                 | 1,109         | 1,135         | 1,286         | 616           | 455           | 746           | 627           | 564           | 1,525         | 307          | 8,370          |
| Tebet                         | 776           | 843           | 901           | 273           | 239           | 492           | 444           | 214           | 812           | 171          | 5,165          |
| <i>Total Cases in Jakarta</i> | <i>27,656</i> | <i>27,694</i> | <i>28,101</i> | <i>10,552</i> | <i>11,901</i> | <i>18,848</i> | <i>17,916</i> | <i>11,494</i> | <i>38,675</i> | <i>7,870</i> | <i>200,707</i> |

**Table S2.** Annual subdistrict incidence rates (IR) per 1,000 population, between 2008 and 2017, excluding cases in infants <1 year. Case data are available online at (1). Calculated annual age-structures are reported in Supplementary File S2.

| Subdistrict         | 2008  | 2009  | 2010  | 2011  | 2012  | 2013   | 2014  | 2015   | 2016  | 2017  | 2008-2017 |
|---------------------|-------|-------|-------|-------|-------|--------|-------|--------|-------|-------|-----------|
| Cakung              | 3.610 | 3.632 | 3.037 | 0.964 | 1.062 | 2.395  | 1.261 | 0.917  | 3.071 | 0.857 | 2.081     |
| Cempaka Putih       | 7.981 | 8.484 | 7.769 | 2.326 | 1.875 | 2.447  | 1.973 | 1.398  | 4.459 | 1.002 | 3.971     |
| Cengkareng          | 1.459 | 0.784 | 2.438 | 0.756 | 0.927 | 1.375  | 1.730 | 1.189  | 6.137 | 0.813 | 1.761     |
| Cilandak            | 4.014 | 3.704 | 3.636 | 0.967 | 1.334 | 2.040  | 2.004 | 0.873  | 2.428 | 0.271 | 2.127     |
| Cilincing           | 1.438 | 2.794 | 1.961 | 1.041 | 0.976 | 1.085  | 1.057 | 1.187  | 2.432 | 0.698 | 1.467     |
| Cipayung            | 2.157 | 2.402 | 3.128 | 1.016 | 1.386 | 2.340  | 1.885 | 1.149  | 4.831 | 0.886 | 2.118     |
| Ciracas             | 1.924 | 2.645 | 2.154 | 0.853 | 1.280 | 1.696  | 1.530 | 0.920  | 3.816 | 0.698 | 1.752     |
| Duren Sawit         | 5.598 | 4.326 | 4.431 | 1.835 | 1.734 | 2.878  | 2.302 | 1.575  | 4.700 | 1.231 | 3.061     |
| Gambir              | 3.474 | 2.503 | 3.052 | 1.185 | 1.262 | 1.553  | 1.511 | 1.029  | 3.070 | 0.620 | 1.926     |
| Grogol Petamburan   | 2.858 | 2.047 | 2.222 | 0.743 | 1.300 | 2.055  | 2.750 | 1.142  | 3.551 | 0.604 | 1.927     |
| Jagakarsa           | 2.394 | 2.962 | 2.678 | 0.725 | 1.374 | 2.213  | 2.230 | 1.332  | 5.159 | 0.870 | 2.194     |
| Jatinegara          | 3.437 | 3.014 | 3.140 | 0.957 | 0.961 | 1.757  | 1.483 | 0.734  | 3.856 | 1.067 | 2.041     |
| Johar Baru          | 3.730 | 3.454 | 4.956 | 1.160 | 1.224 | 1.073  | 1.121 | 0.623  | 2.499 | 0.555 | 2.040     |
| Kali Deres          | 1.029 | 0.486 | 1.451 | 0.599 | 0.805 | 1.081  | 1.393 | 0.968  | 4.668 | 0.644 | 1.312     |
| Kebayoran Baru      | 3.100 | 3.720 | 3.640 | 1.141 | 1.672 | 2.439  | 2.663 | 0.827  | 5.419 | 0.997 | 2.562     |
| Kebayoran Lama      | 3.429 | 3.108 | 3.190 | 1.212 | 1.481 | 1.524  | 1.771 | 1.935  | 3.686 | 0.864 | 2.220     |
| Kebun Jeruk         | 2.977 | 2.496 | 2.447 | 0.648 | 0.614 | 0.695  | 0.822 | 0.405  | 1.329 | 0.283 | 1.271     |
| Kelapa Gading       | 5.749 | 9.771 | 6.912 | 3.572 | 2.922 | 10.199 | 9.592 | 11.039 | 8.213 | 1.435 | 6.941     |
| Kemayoran           | 3.960 | 4.011 | 4.334 | 1.459 | 1.334 | 2.223  | 2.372 | 1.208  | 3.104 | 0.590 | 2.460     |
| Kembangan           | 1.636 | 1.791 | 2.886 | 0.842 | 1.021 | 1.661  | 2.062 | 0.732  | 2.426 | 0.401 | 1.546     |
| Kep. Seribu Selatan | 0.000 | 0.239 | 0.239 | 1.367 | 0.869 | 0.416  | 0.796 | 1.271  | 0.911 | 0.455 | 0.656     |

|                              |              |              |              |              |              |              |              |              |              |              |              |
|------------------------------|--------------|--------------|--------------|--------------|--------------|--------------|--------------|--------------|--------------|--------------|--------------|
| Kep. Seribu Utara            | 0.080        | 0.399        | 0.080        | 0.000        | 0.290        | 0.000        | 0.199        | 0.196        | 0.436        | 0.000        | 0.168        |
| Koja                         | 2.450        | 3.780        | 2.979        | 1.610        | 1.264        | 1.225        | 1.429        | 1.207        | 3.592        | 0.903        | 2.044        |
| Kramat Jati                  | 3.144        | 2.496        | 3.051        | 0.978        | 1.230        | 1.792        | 1.704        | 0.876        | 4.126        | 0.823        | 2.022        |
| Makasar                      | 2.947        | 2.513        | 2.870        | 1.222        | 1.408        | 1.837        | 1.947        | 1.265        | 3.858        | 1.109        | 2.098        |
| Mampang Prapatan             | 4.419        | 3.960        | 3.092        | 0.742        | 1.073        | 2.137        | 2.026        | 0.974        | 4.196        | 0.750        | 2.337        |
| Matraman                     | 4.146        | 4.299        | 4.481        | 1.252        | 1.146        | 1.457        | 1.241        | 0.837        | 3.596        | 0.709        | 2.316        |
| Menteng                      | 4.761        | 3.164        | 3.653        | 1.227        | 1.205        | 1.510        | 1.271        | 0.699        | 2.472        | 0.585        | 2.055        |
| Pademangan                   | 1.969        | 2.368        | 2.558        | 1.381        | 1.272        | 1.732        | 1.502        | 0.785        | 3.443        | 0.680        | 1.769        |
| Palmerah                     | 3.434        | 2.728        | 2.072        | 1.234        | 1.707        | 2.147        | 1.187        | 0.710        | 2.721        | 0.780        | 1.872        |
| Pancoran                     | 4.526        | 4.888        | 4.472        | 0.807        | 1.273        | 2.673        | 2.300        | 1.463        | 3.466        | 0.604        | 2.647        |
| Pasar Minggu                 | 4.965        | 4.512        | 3.841        | 1.125        | 1.423        | 2.181        | 2.670        | 1.122        | 4.555        | 1.061        | 2.745        |
| Pasar Rebo                   | 1.770        | 2.652        | 2.441        | 1.523        | 2.006        | 2.109        | 1.722        | 0.847        | 4.414        | 0.987        | 2.047        |
| Penjaringan                  | 2.100        | 2.086        | 1.839        | 1.096        | 1.144        | 1.905        | 1.938        | 0.554        | 3.699        | 0.489        | 1.685        |
| Pesanggrahan                 | 1.425        | 1.958        | 2.093        | 0.552        | 0.794        | 1.516        | 1.711        | 0.757        | 3.023        | 0.456        | 1.429        |
| Pulo Gadung                  | 3.659        | 4.155        | 3.156        | 1.009        | 1.584        | 2.813        | 1.671        | 1.187        | 4.972        | 1.464        | 2.567        |
| Sawah Besar                  | 3.183        | 3.116        | 3.576        | 1.529        | 1.262        | 1.392        | 1.228        | 0.766        | 3.507        | 0.564        | 2.012        |
| Senen                        | 4.612        | 3.929        | 4.000        | 1.216        | 1.038        | 1.655        | 1.108        | 0.560        | 2.199        | 0.310        | 2.063        |
| Setiabudi                    | 3.650        | 3.201        | 3.507        | 1.542        | 1.250        | 2.224        | 1.490        | 0.585        | 3.873        | 0.651        | 2.197        |
| Taman Sari                   | 2.622        | 2.714        | 2.897        | 1.146        | 1.164        | 1.262        | 1.247        | 0.598        | 2.557        | 0.298        | 1.650        |
| Tambora                      | 1.684        | 1.440        | 1.475        | 0.705        | 0.799        | 0.964        | 1.069        | 0.837        | 2.041        | 0.488        | 1.150        |
| Tanah Abang                  | 1.708        | 1.466        | 2.280        | 0.916        | 1.136        | 1.387        | 1.223        | 0.614        | 2.678        | 0.542        | 1.395        |
| Tanjung Priok                | 2.997        | 3.068        | 3.476        | 1.650        | 1.208        | 1.963        | 1.636        | 1.456        | 3.886        | 0.782        | 2.212        |
| Tebet                        | 3.608        | 3.920        | 4.190        | 1.248        | 1.075        | 2.176        | 1.932        | 0.925        | 3.452        | 0.727        | 2.325        |
| <i>Average IR in Jakarta</i> | <i>2.980</i> | <i>2.984</i> | <i>3.027</i> | <i>1.115</i> | <i>1.234</i> | <i>1.917</i> | <i>1.789</i> | <i>1.128</i> | <i>3.753</i> | <i>0.764</i> | <i>2.069</i> |



## 2. Population age-structures

**Table S3.** Average population age-structures calculated for the period 2008-2017. Yearly population age-structures used are given in Supplementary file S2.

| Subdistrict         | 1-4    | 5-9    | 10-14  | 15-19  | 20-44   | 45-54  | 55-64  | 65-74  | >75   | Total   |
|---------------------|--------|--------|--------|--------|---------|--------|--------|--------|-------|---------|
| Cakung              | 43,697 | 44,254 | 38,036 | 36,500 | 223,198 | 51,694 | 26,377 | 7,617  | 1,934 | 473,307 |
| Cempaka Putih       | 6,458  | 6,957  | 6,772  | 6,810  | 37,785  | 11,736 | 6,295  | 3,118  | 1,302 | 87,233  |
| Cengkareng          | 44,150 | 43,581 | 37,950 | 39,562 | 236,817 | 54,006 | 26,165 | 8,674  | 2,531 | 493,436 |
| Cilandak            | 15,313 | 16,317 | 15,381 | 15,427 | 88,278  | 25,632 | 13,151 | 6,077  | 2,464 | 198,040 |
| Cilincing           | 35,918 | 35,656 | 31,501 | 31,366 | 182,056 | 37,736 | 19,207 | 7,011  | 1,847 | 382,298 |
| Cipayung            | 20,706 | 21,032 | 19,130 | 18,701 | 105,033 | 27,634 | 13,895 | 4,665  | 1,288 | 232,084 |
| Ciracas             | 23,107 | 23,194 | 20,578 | 20,496 | 120,456 | 31,309 | 17,573 | 5,633  | 1,453 | 263,799 |
| Duren Sawit         | 31,740 | 32,991 | 29,257 | 28,360 | 172,836 | 44,272 | 27,216 | 12,582 | 3,275 | 382,529 |
| Gambir              | 6,119  | 6,612  | 6,606  | 6,839  | 38,769  | 11,940 | 7,714  | 3,595  | 1,771 | 89,965  |
| Grogol Petamburan   | 17,173 | 16,753 | 14,119 | 15,488 | 103,285 | 26,255 | 16,376 | 8,730  | 3,202 | 221,381 |
| Jagakarsa           | 26,108 | 26,692 | 23,462 | 23,584 | 134,865 | 34,350 | 17,986 | 6,907  | 1,906 | 295,860 |
| Jatinegara          | 24,706 | 25,004 | 22,471 | 22,690 | 130,494 | 36,601 | 21,121 | 9,337  | 3,383 | 295,807 |
| Johar Baru          | 9,943  | 10,991 | 10,365 | 10,238 | 55,403  | 15,359 | 8,449  | 3,593  | 1,260 | 125,601 |
| Kali Deres          | 33,901 | 34,381 | 30,143 | 32,642 | 181,921 | 41,197 | 17,602 | 6,013  | 1,890 | 379,690 |
| Kebayoran Baru      | 11,953 | 12,669 | 12,044 | 12,291 | 69,573  | 21,463 | 11,799 | 5,221  | 2,268 | 159,281 |
| Kebayoran Lama      | 22,318 | 22,909 | 20,557 | 21,168 | 125,618 | 34,262 | 18,443 | 8,511  | 2,763 | 276,549 |
| Kebun Jeruk         | 27,209 | 25,284 | 22,077 | 23,838 | 147,968 | 35,568 | 20,546 | 8,723  | 2,758 | 313,971 |
| Kelapa Gading       | 9,263  | 9,405  | 8,310  | 9,123  | 57,593  | 16,028 | 11,222 | 5,427  | 1,653 | 128,024 |
| Kemayoran           | 17,748 | 19,207 | 18,418 | 17,810 | 98,254  | 28,287 | 15,698 | 7,412  | 2,638 | 225,472 |
| Kembangan           | 21,776 | 21,294 | 18,059 | 19,848 | 118,779 | 28,145 | 16,102 | 5,972  | 1,810 | 251,785 |
| Kep. Seribu Selatan | 890    | 953    | 981    | 817    | 4,021   | 1,005  | 513    | 245    | 66    | 9,491   |
| Kep. Seribu Utara   | 1,327  | 1,349  | 1,500  | 1,348  | 5,876   | 1,550  | 768    | 290    | 143   | 14,151  |
| Koja                | 28,869 | 27,723 | 23,866 | 24,607 | 145,298 | 33,302 | 17,185 | 6,378  | 1,751 | 308,979 |
| Kramat Jati         | 24,057 | 24,246 | 21,089 | 20,756 | 123,257 | 32,979 | 17,576 | 6,881  | 2,166 | 273,007 |
| Makasar             | 16,706 | 16,885 | 14,949 | 14,980 | 87,556  | 23,820 | 12,792 | 4,700  | 1,300 | 193,688 |
| Mampang Prapatan    | 12,060 | 12,351 | 10,963 | 11,293 | 66,329  | 18,069 | 9,168  | 3,628  | 1,155 | 145,016 |
| Matraman            | 13,950 | 14,394 | 13,230 | 13,202 | 75,391  | 23,547 | 12,758 | 5,565  | 2,147 | 174,184 |



|                          |         |         |         |         |           |           |         |         |        |           |
|--------------------------|---------|---------|---------|---------|-----------|-----------|---------|---------|--------|-----------|
| Menteng                  | 5,867   | 6,225   | 6,238   | 6,483   | 34,212    | 10,819    | 6,723   | 2,804   | 1,256  | 80,627    |
| Pademangan               | 13,037  | 13,311  | 11,556  | 11,955  | 73,183    | 18,063    | 9,953   | 4,239   | 1,373  | 156,670   |
| Palmerah                 | 17,718  | 17,749  | 15,308  | 16,755  | 96,943    | 25,674    | 13,555  | 5,760   | 2,168  | 211,630   |
| Pancoran                 | 12,890  | 12,888  | 11,157  | 11,345  | 69,903    | 18,787    | 9,758   | 4,615   | 1,441  | 152,784   |
| Pasar Minggu             | 24,457  | 25,147  | 21,749  | 21,935  | 133,332   | 34,592    | 18,127  | 7,971   | 2,506  | 289,816   |
| Pasar Rebo               | 17,273  | 17,712  | 15,585  | 15,032  | 89,757    | 23,259    | 12,517  | 4,097   | 1,149  | 196,381   |
| Penjaringan              | 23,682  | 24,065  | 21,419  | 22,051  | 136,324   | 32,828    | 19,765  | 8,456   | 2,969  | 291,559   |
| Pesanggrahan             | 19,137  | 19,482  | 17,658  | 17,233  | 102,305   | 25,700    | 14,673  | 6,146   | 1,681  | 224,015   |
| Pulo Gadung              | 22,129  | 23,079  | 20,725  | 20,841  | 123,240   | 36,079    | 18,559  | 9,328   | 3,555  | 277,535   |
| Sawah Besar              | 8,320   | 8,913   | 8,548   | 8,923   | 52,275    | 15,612    | 10,096  | 4,836   | 2,147  | 119,670   |
| Senen                    | 8,386   | 9,036   | 8,667   | 8,923   | 49,616    | 14,585    | 8,708   | 3,733   | 1,501  | 113,155   |
| Setiabudi                | 8,366   | 8,909   | 8,023   | 8,325   | 48,588    | 14,227    | 7,735   | 3,316   | 1,293  | 108,782   |
| Taman Sari               | 8,603   | 8,639   | 7,977   | 9,284   | 54,698    | 15,672    | 10,469  | 5,051   | 2,398  | 122,791   |
| Tambora                  | 20,131  | 20,846  | 18,267  | 20,299  | 120,254   | 30,732    | 17,707  | 7,592   | 2,960  | 258,788   |
| Tanah Abang              | 12,550  | 13,324  | 12,495  | 12,680  | 68,930    | 20,035    | 11,010  | 4,670   | 1,856  | 157,550   |
| Tanjung Priok            | 32,161  | 32,505  | 28,097  | 29,623  | 176,861   | 43,971    | 23,948  | 9,504   | 2,866  | 379,536   |
| Tebet                    | 17,554  | 18,059  | 17,090  | 17,625  | 97,205    | 29,860    | 16,406  | 7,488   | 3,098  | 224,385   |
| Total (Jakarta Province) | 819,426 | 832,973 | 742,373 | 759,096 | 4,464,335 | 1,158,241 | 633,406 | 262,111 | 88,341 | 9,760,302 |

### 3. Mathematical Models

#### 3.1 Incidence Model

The incidence of primary, secondary, tertiary and quaternary infections within each age-group  $j$  are given by the following equations (Equations 1.1-1.4).

$$I_1(j) = \int_{a_j}^{a_{j+1}} 4\lambda(e^{-\lambda a})^4 da \quad [1.1]$$

$$I_2(j) = 4 \int_{a_j}^{a_{j+1}} 3\lambda(1-e^{-\lambda a})(e^{-\lambda a})^3 da \quad [1.2]$$

$$I_3(j) = 4 \int_{a_j}^{a_{j+1}} 3\lambda(1-e^{-\lambda a})^2(e^{-\lambda a})^2 da \quad [1.3]$$

$$I_4(j) = 4 \int_{a_j}^{a_{j+1}} \lambda(1-e^{-\lambda a})^3 e^{-\lambda a} da \quad [1.4]$$

The average annual incidence of dengue disease per person in age-group  $j$ ,  $D(j)$ , is then calculated as the weighted sum of primary and secondary infections (Equation 2):

$$D(j) = \frac{\rho}{w(j)} (I_2(j) + \gamma_1(I_1(j)) + Bw(j)) \quad [2]$$

Here  $\lambda$  is the age- and time-constant force of infection of each dengue serotype,  $a_j$  and  $a_{j+1}$  are the lower and upper bounds of age-group  $j$ , respectively.  $\rho$  is the probability that a secondary infection results in a detectable dengue case (baseline reporting rate),  $w(j)$  is the width of age-group  $j$ ,  $\gamma_1$  is the probability that a primary infection is detected relative to a secondary infection, and  $B$  is the probability of reporting non-dengue illnesses as dengue due to misdiagnosis (baseline non-dengue reporting). The total force of infection is then calculated as four times the serotype-specific force of infection (i.e.  $4\lambda$ ). All parameters were given uniform priors.

#### 3.2 Likelihood function

The expected number of cases per year in age-group  $j$ ,  $C_j$ , is given by:

$$C_j = D(j)n(j) \quad [3]$$

Where  $D(j)$  is the expected disease incidence in age-group  $j$ , and  $n(j)$  is the population size of age-group  $j$ .

We assumed that the total number of cases across all ages,  $N$ , was Poisson distributed (Equation 4):

$$P(\mu = N) = \frac{\mu^N e^{-\mu}}{N!} \quad [4]$$

Where  $\mu$  is the total expected number of cases across all age-groups (i.e.  $\sum C_j$ ). We assumed that the number of cases reported in each age-group were multinomially distributed and so the full log-likelihood is given by:

$$\ln L_j = \sum [\ln(p_j)y_j] + N \ln(\mu) - \mu - \ln(N!) \quad [5]$$

Where  $p_j$  is the expected proportion of cases in one age-group relative to the total number of cases across all age-groups, (i.e.  $C_j / \sum_j C_j$ ), and  $y_j$  is the observed number of cases in age-group  $j$ .

### 3.3 Seropositive proportion of the population

The proportion of the population seropositive to at least one dengue serotype by age is determined by the force of infection,  $\lambda$ . Given a total force of infection of  $4\lambda$  (assuming equal transmissibility across serotypes), the expected proportion of the population seropositive to dengue by age  $a$ ,  $p(a)$ , is defined by the catalytic model as shown in Equation 6.

$$p(a) = 1 - e^{(-4\lambda a)} \quad [6]$$

### 3.4 Basic Reproduction Number

Assuming that dengue force of infection was constant in time and equally transmissible across all 4 serotypes, we calculated the basic reproduction number of each serotype,  $R_0$ , under two assumptions. Under assumption 1, we assumed that all infections (primary-quaternary) are equally infectious, with no cross-immunity between serotypes, shown in Equation 7:

$$R_0 = \frac{1}{1 - \int_{a_j}^{a_{j+1}} f(a)[1 - e^{-\lambda a}] da} \quad [7]$$

Where  $f(a)$  is the proportion of the population in age-group  $a$ ,  $[1 - e^{-\lambda a}]$  is the proportion of the population seropositive to one serotype at age  $a$ , and  $a_j$  and  $a_{j+1}$  are the lower and upper bounds of age-group  $j$ .

Under assumption 2, we assume that only primary and secondary infections are infectious and contribute to onward transmission. The basic reproduction number for any one serotype is then given by:

$$R_0 = \frac{1}{\int_{a_j}^{a_{j+1}} f(a)[e^{-\lambda a} + (n-1)(1 - e^{-\lambda a})] da} \quad [8]$$

Where  $f(a)$  is the proportion of the population in age-group  $a$ ,  $e^{-\lambda a}$  is the proportion seronegative at age  $a$ ,  $n$  is the number of serotypes in circulation (4 in this case),  $[1 - e^{-\lambda a}]$  is the proportion seropositive at age  $a$ , and  $a_j$  and  $a_{j+1}$  are the lower and upper bounds of age-group  $j$ .

### 3.5 Linear regression for prediction of force of infection

A simple linear regression model was used to determine the relationship between subdistrict force of infection and population density, as follows:

$$Y = \beta_1 + \beta_2 X + \varepsilon$$

[9]

Where  $Y$  is the force of infection ( $4\lambda$ ),  $X$  is the population density,  $\beta_1$  is the intercept,  $\beta_2$  is the slope, and  $\varepsilon$  is the error term, which was assumed to be Normally distributed.

## 4. Results

### 4.1 Jakarta province: parameter estimates and model fits from yearly and cumulative data

**Table S4.** Median parameter estimates, 95% credible intervals (Crl) and DIC values obtained from the fit of model variants *S* and *PS* to individual years and cumulative data reported in the period 2008-2017 in Jakarta province. Differences in DIC values ( $S - PS$ ) show which model variant provided a better fit to the data (negative values favour model variant *S* and positive values favour *PS*).

| Year/Period | Model     | $4\lambda$<br>median and (95%<br>Crl) | $\rho$<br>median and<br>(95%Crl) | $\gamma_1$<br>median and<br>(95%Crl) | $\beta$<br>median and<br>(95%Crl) | DIC       | $\Delta$ DIC<br>( <i>S</i> - <i>PS</i> ) |
|-------------|-----------|---------------------------------------|----------------------------------|--------------------------------------|-----------------------------------|-----------|------------------------------------------|
| 2008        | <i>S</i>  | 0.119 (0.116-0.121)                   | 0.114 (0.109-0.118)              | -                                    | 0.009 (0.008-0.010)               | 93659.871 | -2.940                                   |
|             | <i>PS</i> | 0.118 (0.115-0.121)                   | 0.113 (0.109-0.118)              | 0.004 (0.001-0.014)                  | 0.009 (0.008-0.010)               | 93662.811 |                                          |
| 2009        | <i>S</i>  | 0.120 (0.117-0.123)                   | 0.115 (0.111-0.119)              | -                                    | 0.009 (0.008-0.010)               | 93635.849 | -3.046                                   |
|             | <i>PS</i> | 0.119 (0.117-0.122)                   | 0.115 (0.111-0.119)              | 0.003 (0.001-0.013)                  | 0.009 (0.008-0.010)               | 93638.895 |                                          |
| 2010        | <i>S</i>  | 0.131 (0.128-0.133)                   | 0.112 (0.109-0.116)              | -                                    | 0.010 (0.009-0.011)               | 96789.824 | -3.207                                   |
|             | <i>PS</i> | 0.130 (0.127-0.133)                   | 0.112 (0.109-0.116)              | 0.002 (0.001-0.011)                  | 0.010 (0.009-0.011)               | 96793.031 |                                          |
| 2011        | <i>S</i>  | 0.140 (0.134-0.147)                   | 0.032 (0.030-0.034)              | -                                    | 0.018 (0.015-0.020)               | 36869.987 | 21.289                                   |
|             | <i>PS</i> | 0.118 (0.107-0.129)                   | 0.031 (0.028-0.033)              | 0.182 (0.102-0.277)                  | 0.016 (0.014-0.019)               | 36848.698 |                                          |
| 2012        | <i>S</i>  | 0.147 (0.140-0.154)                   | 0.033 (0.031-0.035)              | -                                    | 0.020 (0.018-0.023)               | 42197.232 | 17.356                                   |
|             | <i>PS</i> | 0.125 (0.114-0.137)                   | 0.031 (0.029-0.034)              | 0.170 (0.088-0.268)                  | 0.020 (0.017-0.022)               | 42179.876 |                                          |
| 2013        | <i>S</i>  | 0.135 (0.131-0.139)                   | 0.063 (0.060-0.066)              | -                                    | 0.013 (0.012-0.015)               | 67245.316 | -0.133                                   |
|             | <i>PS</i> | 0.131 (0.125-0.136)                   | 0.062 (0.059-0.065)              | 0.029 (0.002-0.072)                  | 0.013 (0.012-0.015)               | 67245.449 |                                          |
| 2014        | <i>S</i>  | 0.138 (0.133-0.142)                   | 0.054 (0.051-0.057)              | -                                    | 0.016 (0.015-0.018)               | 64541.894 | 17.735                                   |
|             | <i>PS</i> | 0.124 (0.116-0.131)                   | 0.052 (0.049-0.055)              | 0.114 (0.061-0.173)                  | 0.015 (0.014-0.017)               | 64524.159 |                                          |

|           |           |                     |                     |                     |                     |            |        |
|-----------|-----------|---------------------|---------------------|---------------------|---------------------|------------|--------|
| 2015      | <i>S</i>  | 0.141 (0.135-0.148) | 0.030 (0.028-0.032) | -                   | 0.020 (0.018-0.023) | 41955.472  | 34.45  |
|           | <i>PS</i> | 0.115 (0.105-0.126) | 0.028 (0.026-0.031) | 0.228 (0.144-0.330) | 0.020 (0.017-0.023) | 41921.022  |        |
| 2016      | <i>S</i>  | 0.136 (0.134-0.138) | 0.179 (0.176-0.182) | -                   | 0.005 (0.005-0.005) | 137876.585 | -5.517 |
|           | <i>PS</i> | 0.135 (0.134-0.137) | 0.179 (0.176-0.182) | 0.001 (0.001-0.004) | 0.005 (0.005-0.005) | 137882.102 |        |
| 2017      | <i>S</i>  | 0.178 (0.171-0.185) | 0.026 (0.025-0.028) | -                   | 0.013 (0.012-0.014) | 29243.400  | 14.061 |
|           | <i>PS</i> | 0.159 (0.148-0.171) | 0.024 (0.022-0.026) | 0.158 (0.076-0.255) | 0.013 (0.012-0.015) | 29229.339  |        |
| 2008-2017 | <i>S</i>  | 0.130 (0.129-0.131) | 0.077 (0.076-0.078) | -                   | 0.010 (0.010-0.010) | 705596.266 | -2.548 |
|           | <i>PS</i> | 0.130 (0.129-0.131) | 0.077 (0.076-0.077) | 0.003 (0.001-0.010) | 0.010 (0.010-0.010) | 705598.814 |        |

**Figure S1.** Fit of model variants *S* (orange line and ribbon indicating median and 95% credible intervals) and *PS* (green line and ribbon indicating median and 95% credible intervals) to yearly and cumulative (2008-2017) age-stratified DHF incidence rates reported in Jakarta province (black points and bars, indicating mean and 95% confidence intervals). Confidence intervals around the reported DHF incidence rates were computed using the binomial distribution.

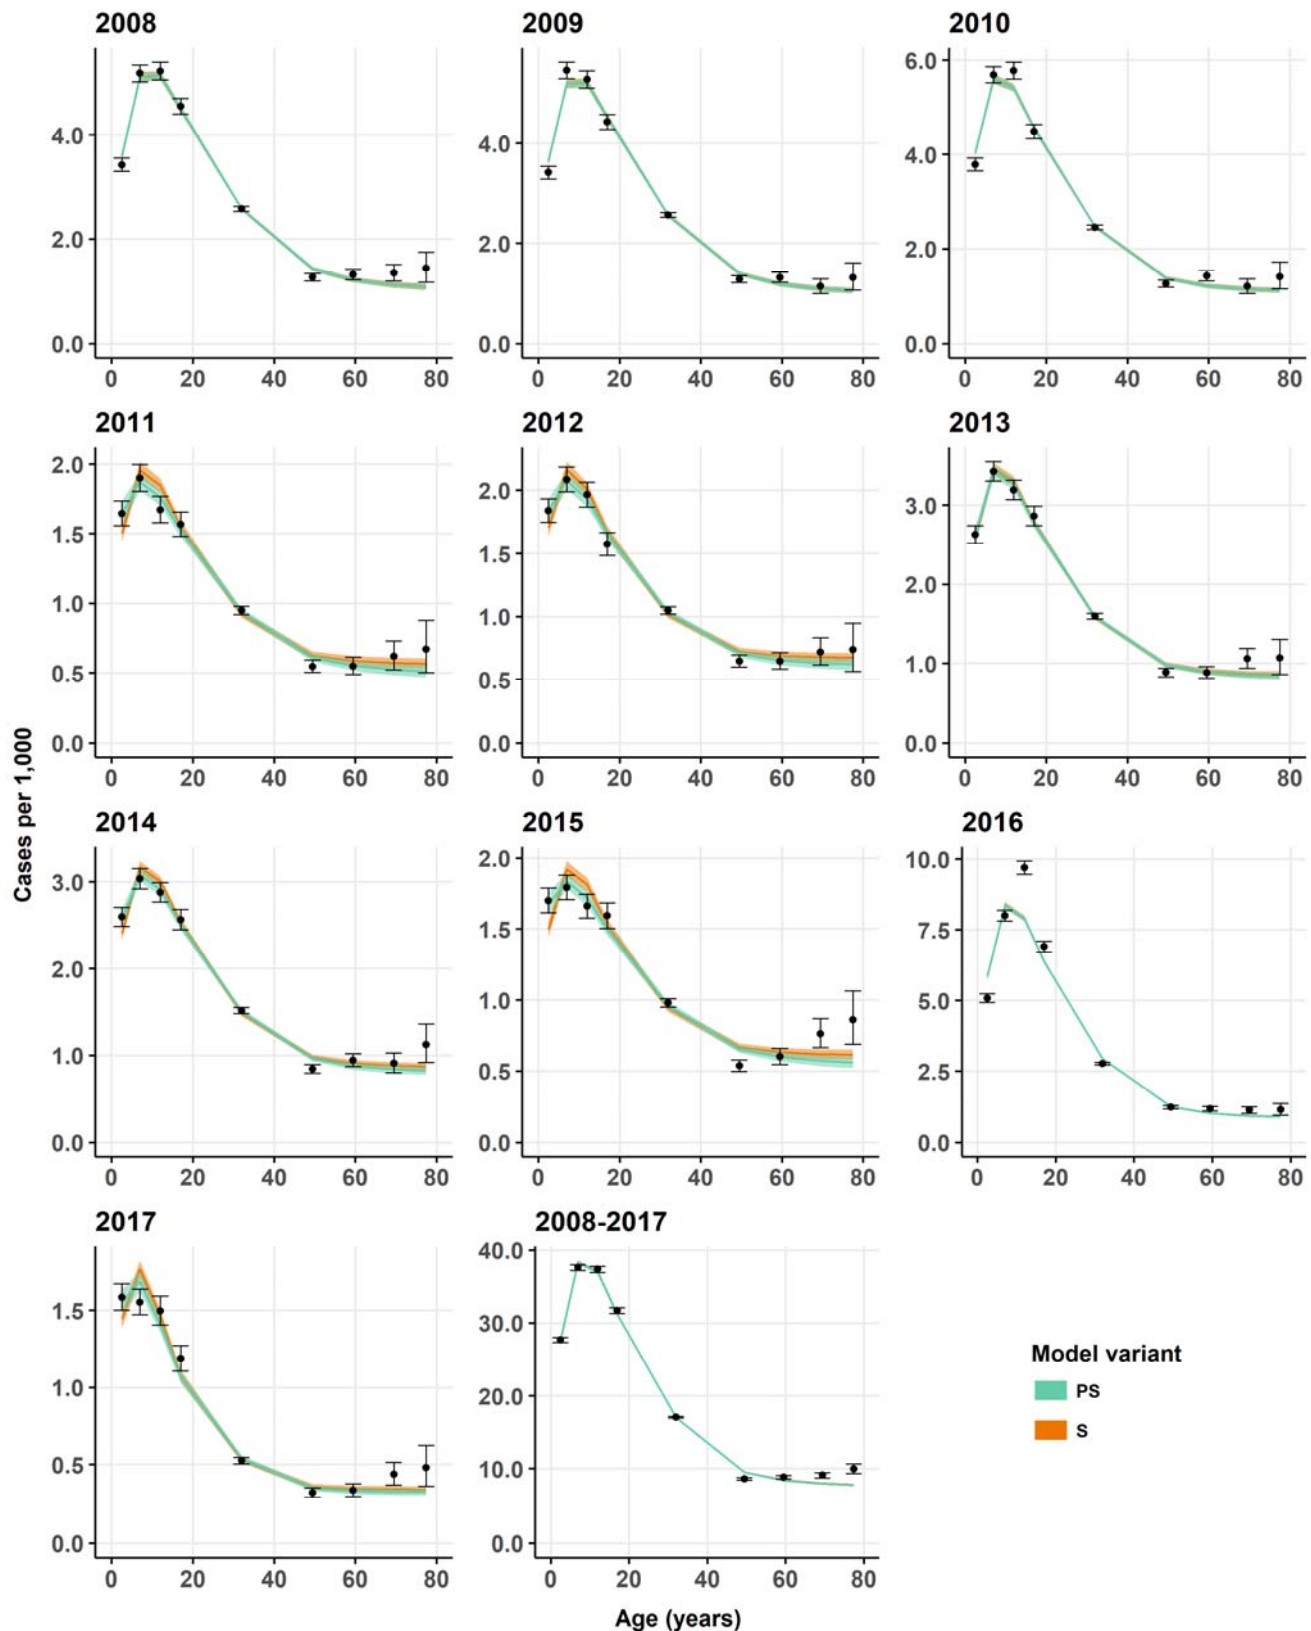

#### 4.2 Jakarta subdistricts: parameter estimates and model fits from cumulative data

**Figure S2.** Median and 95% credible interval of parameter estimates, log-likelihood (LnL) and DIC values obtained from the fit of model variants *S* (orange) and *PS* (green) to cumulative age-stratified DHF data (2008-2017) reported in Jakarta's subdistricts. Subdistrict parameter estimates from yearly data are given in Supplementary file S3.

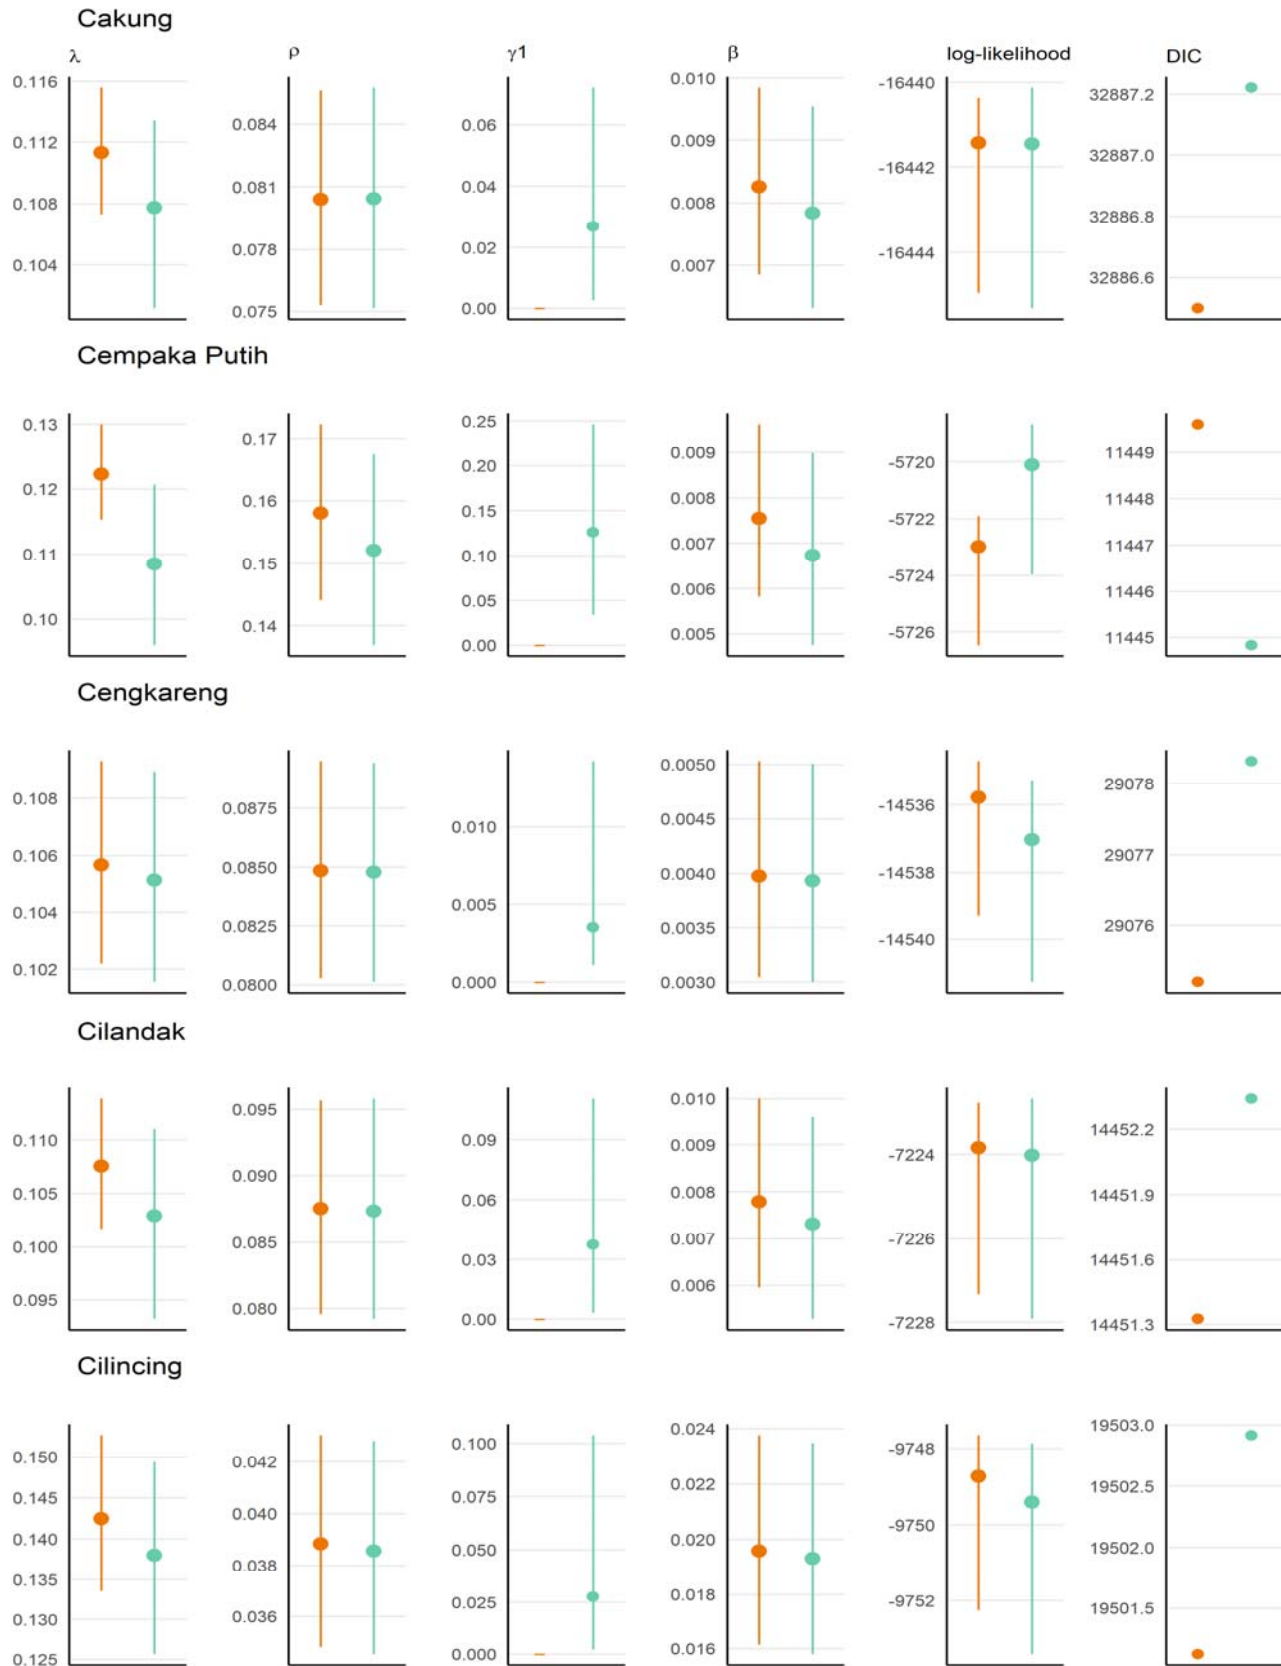



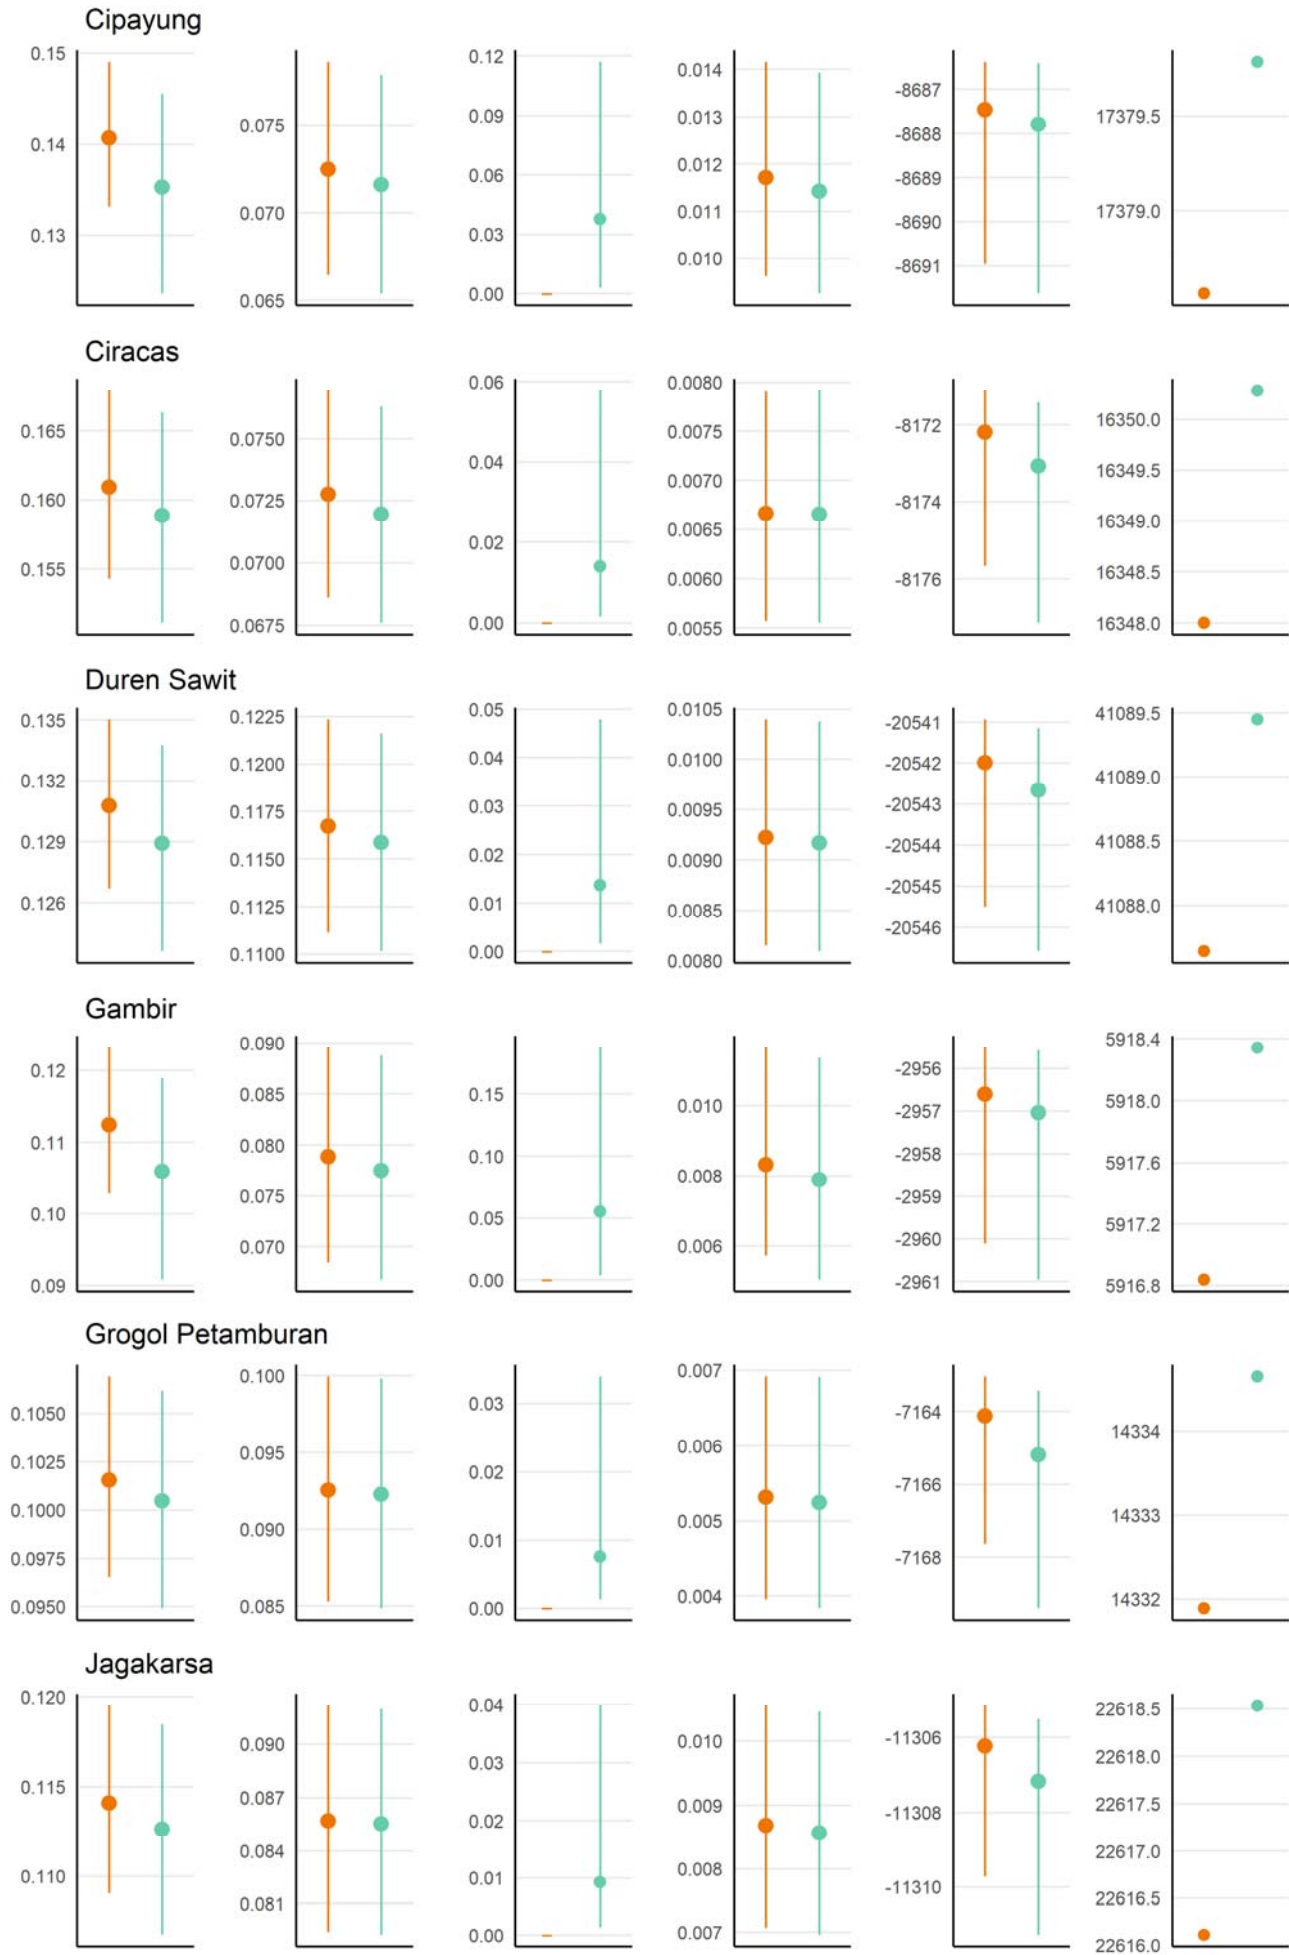

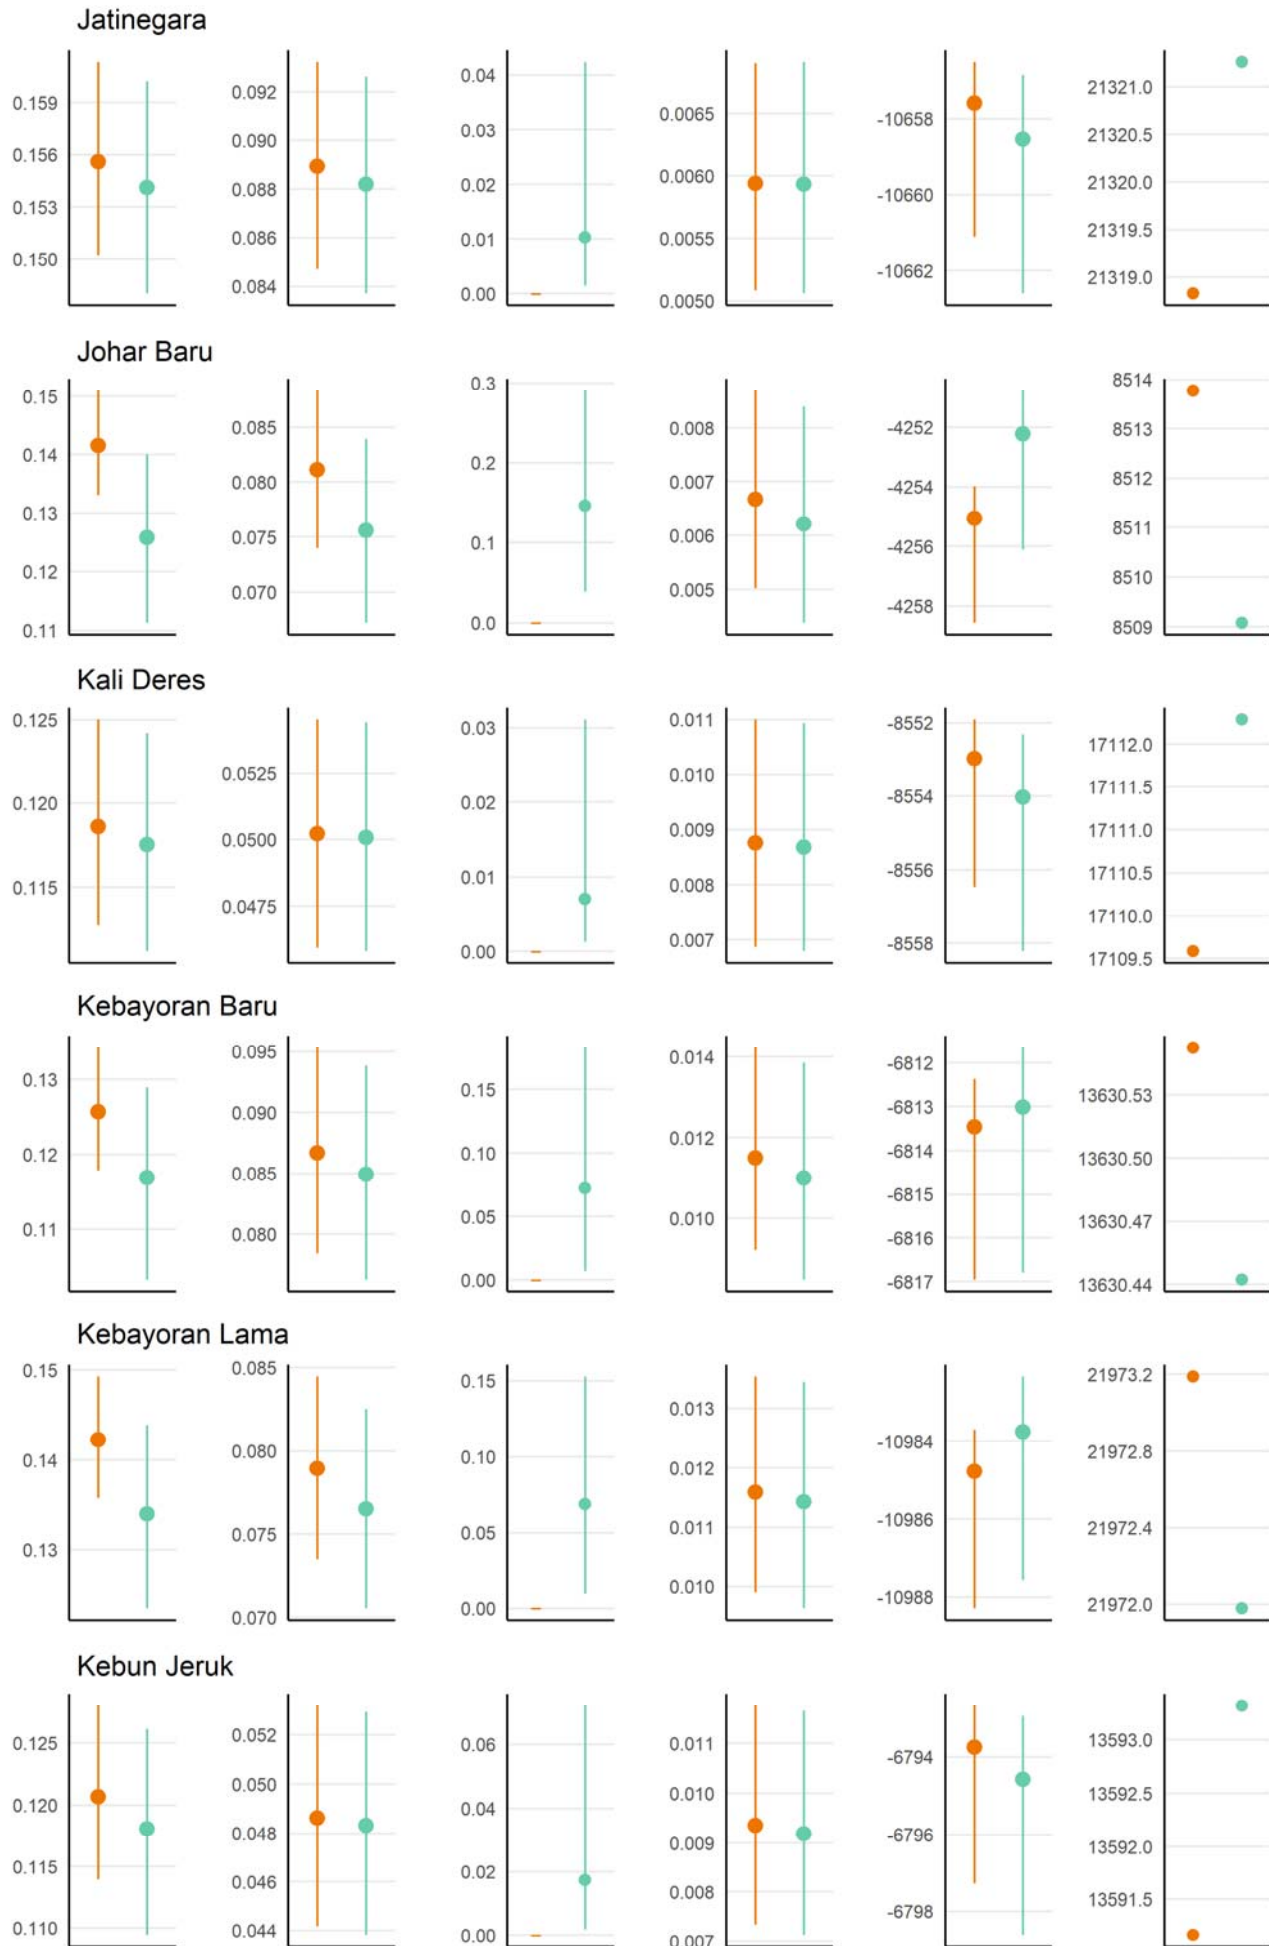

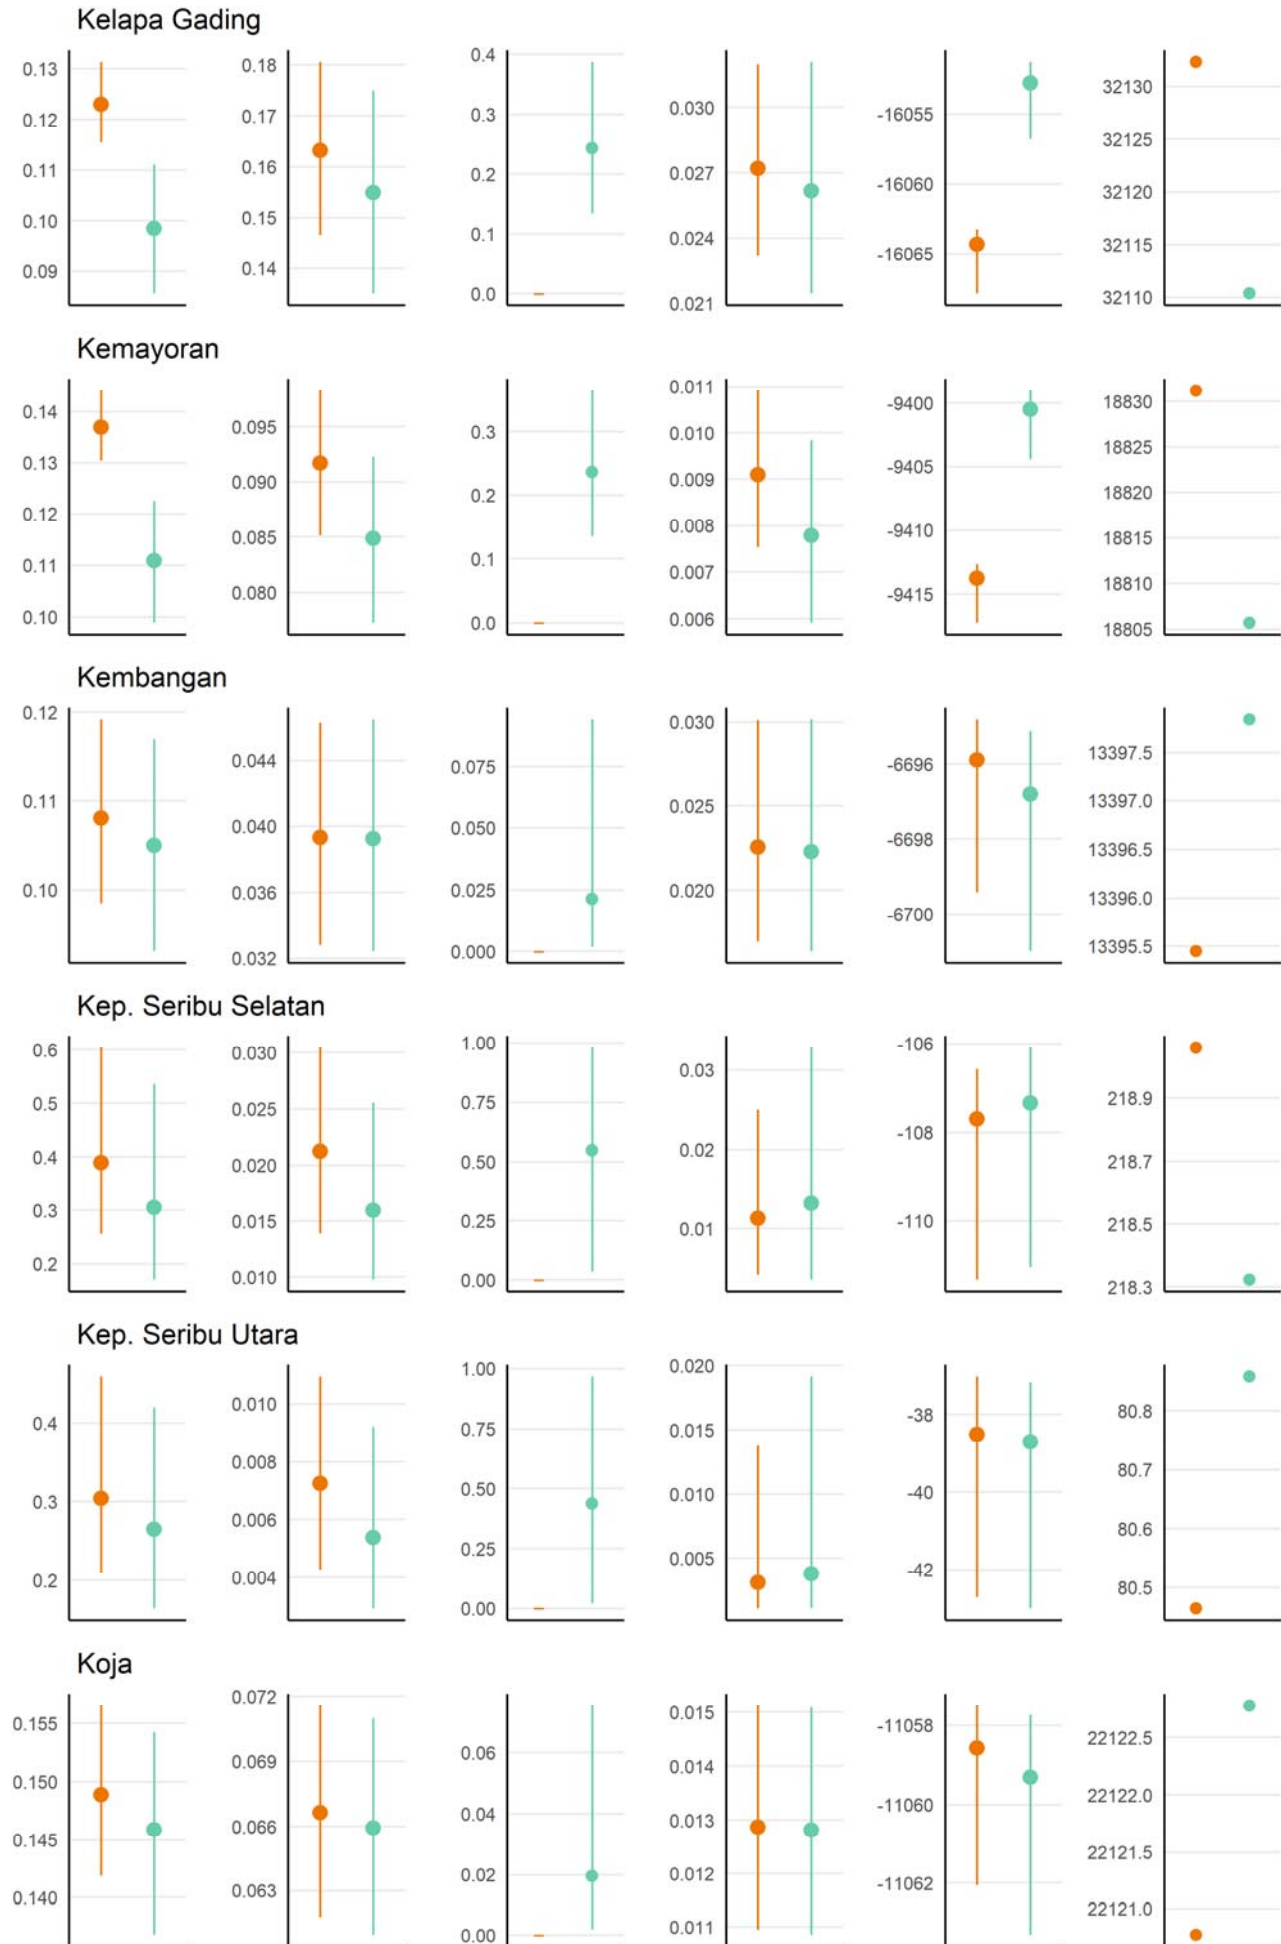

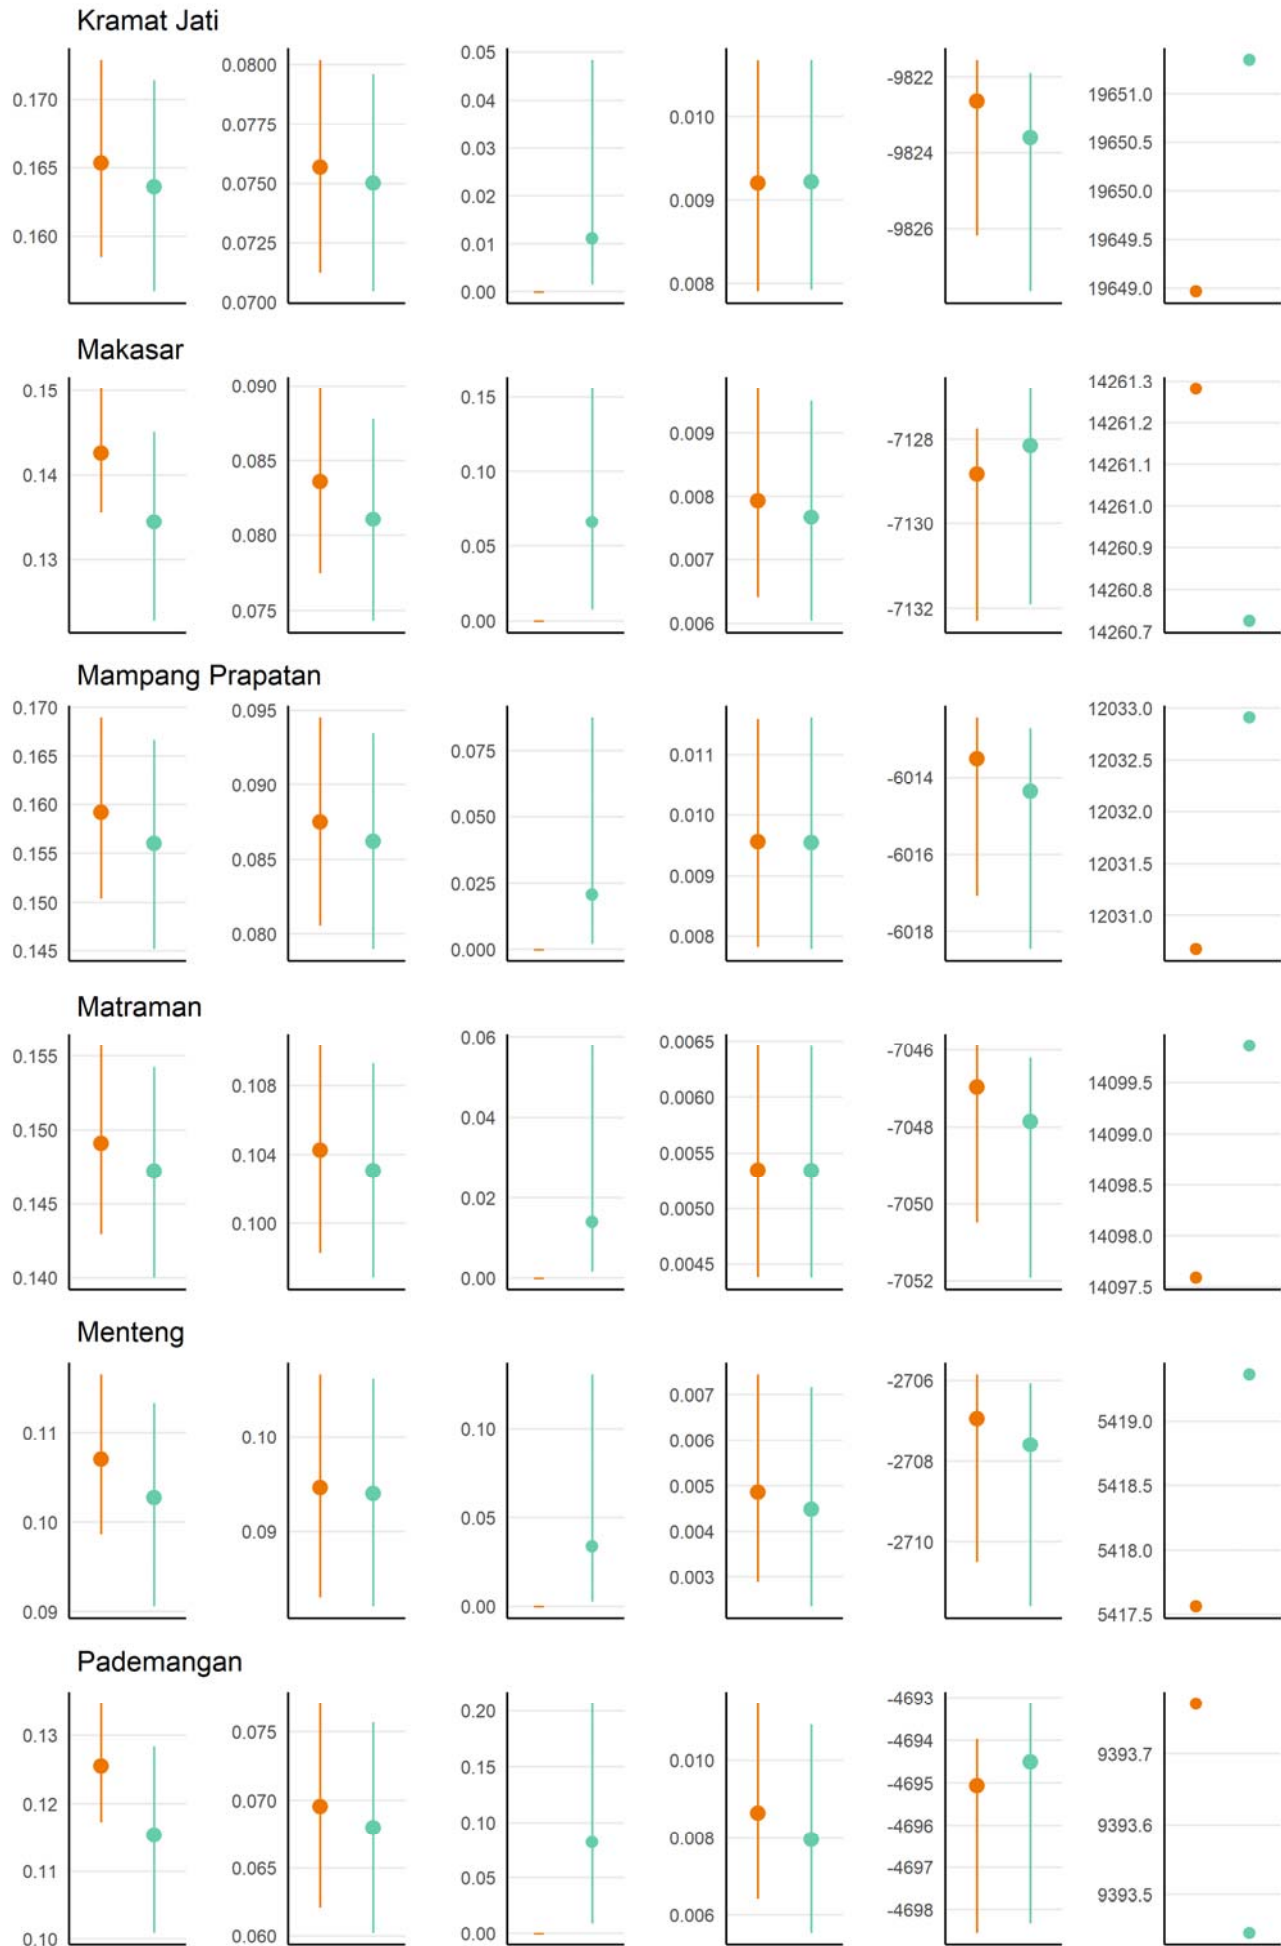

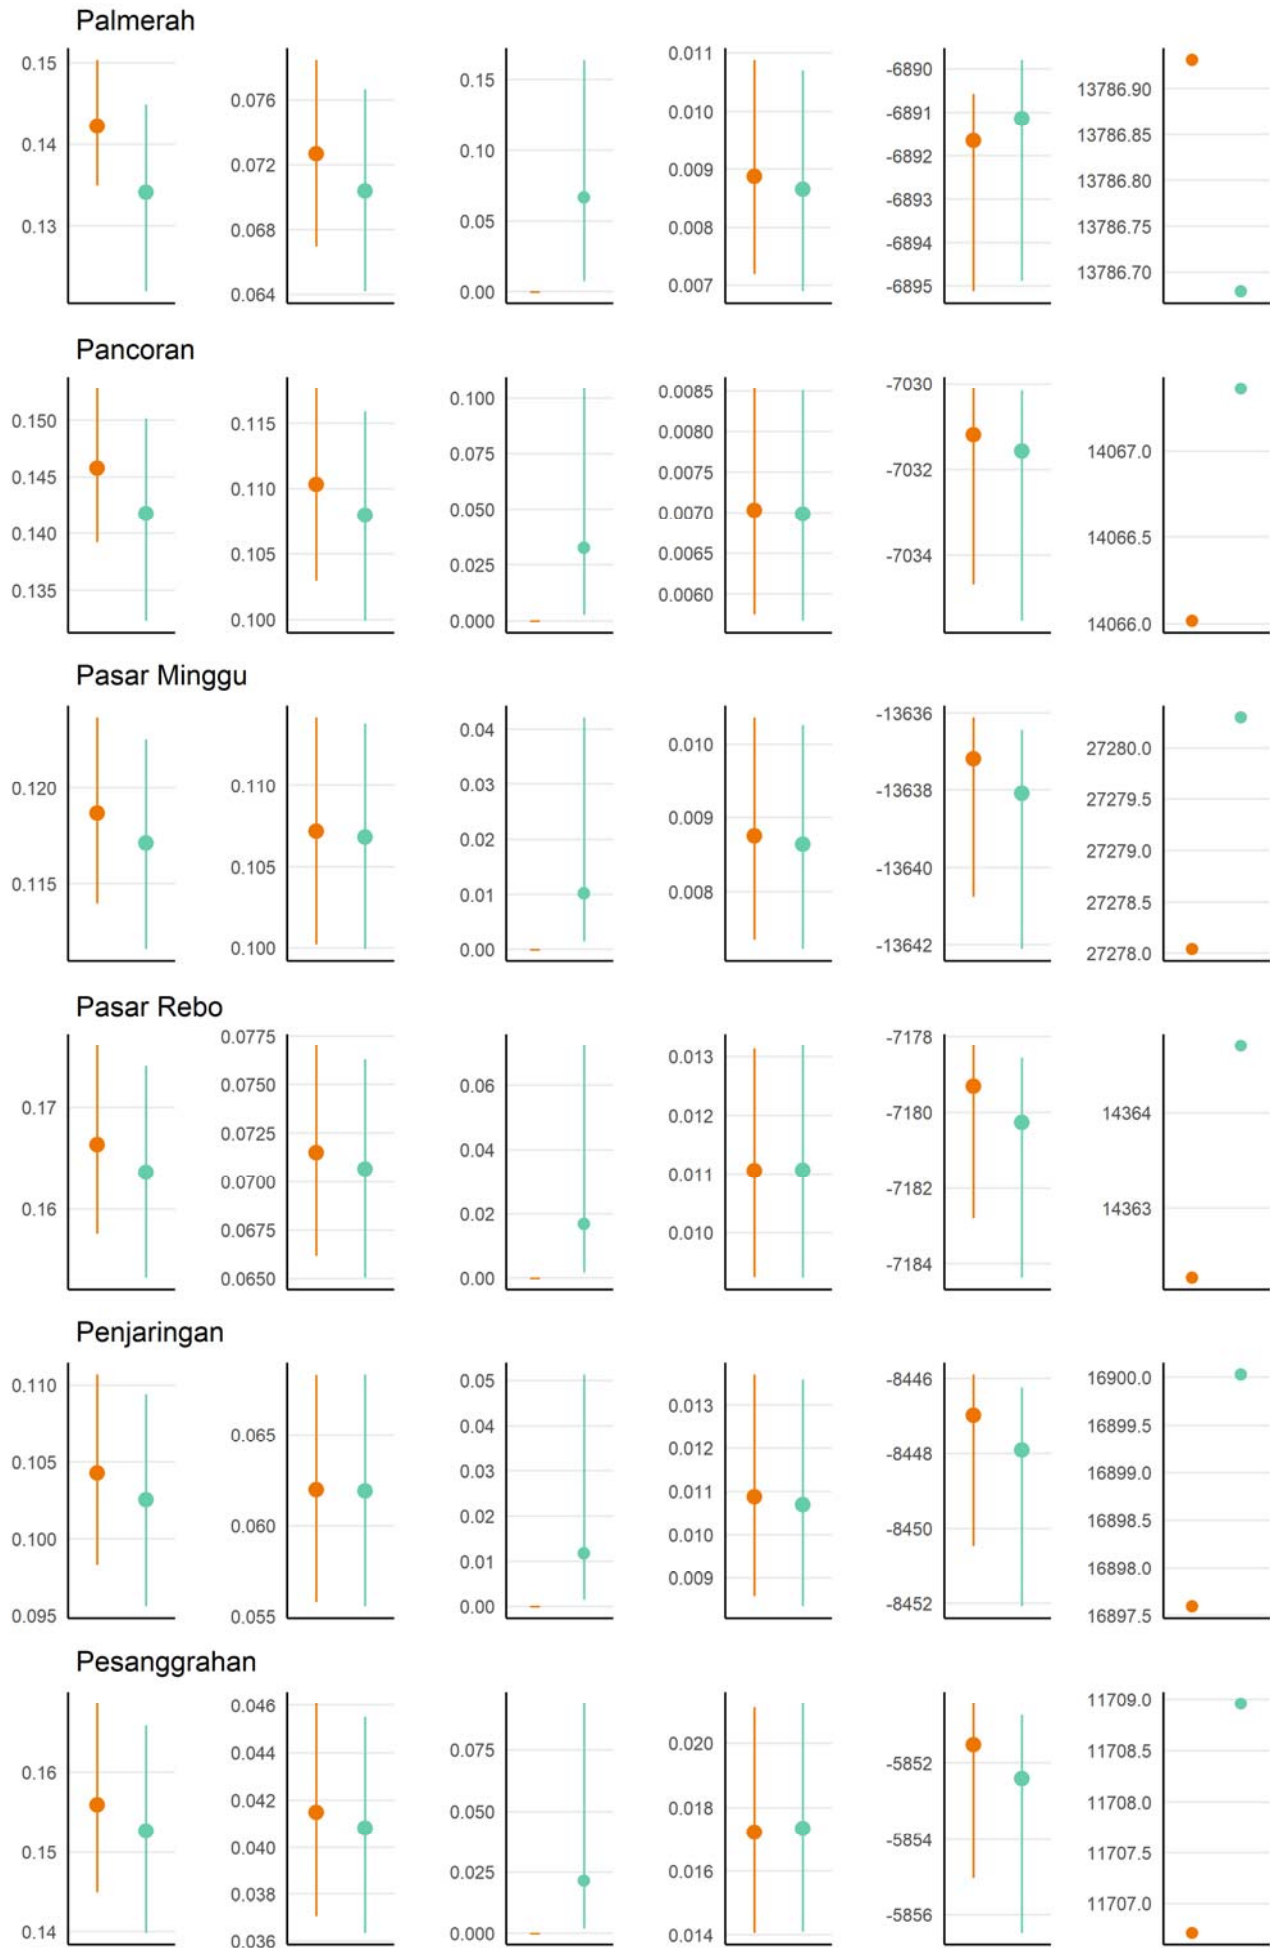



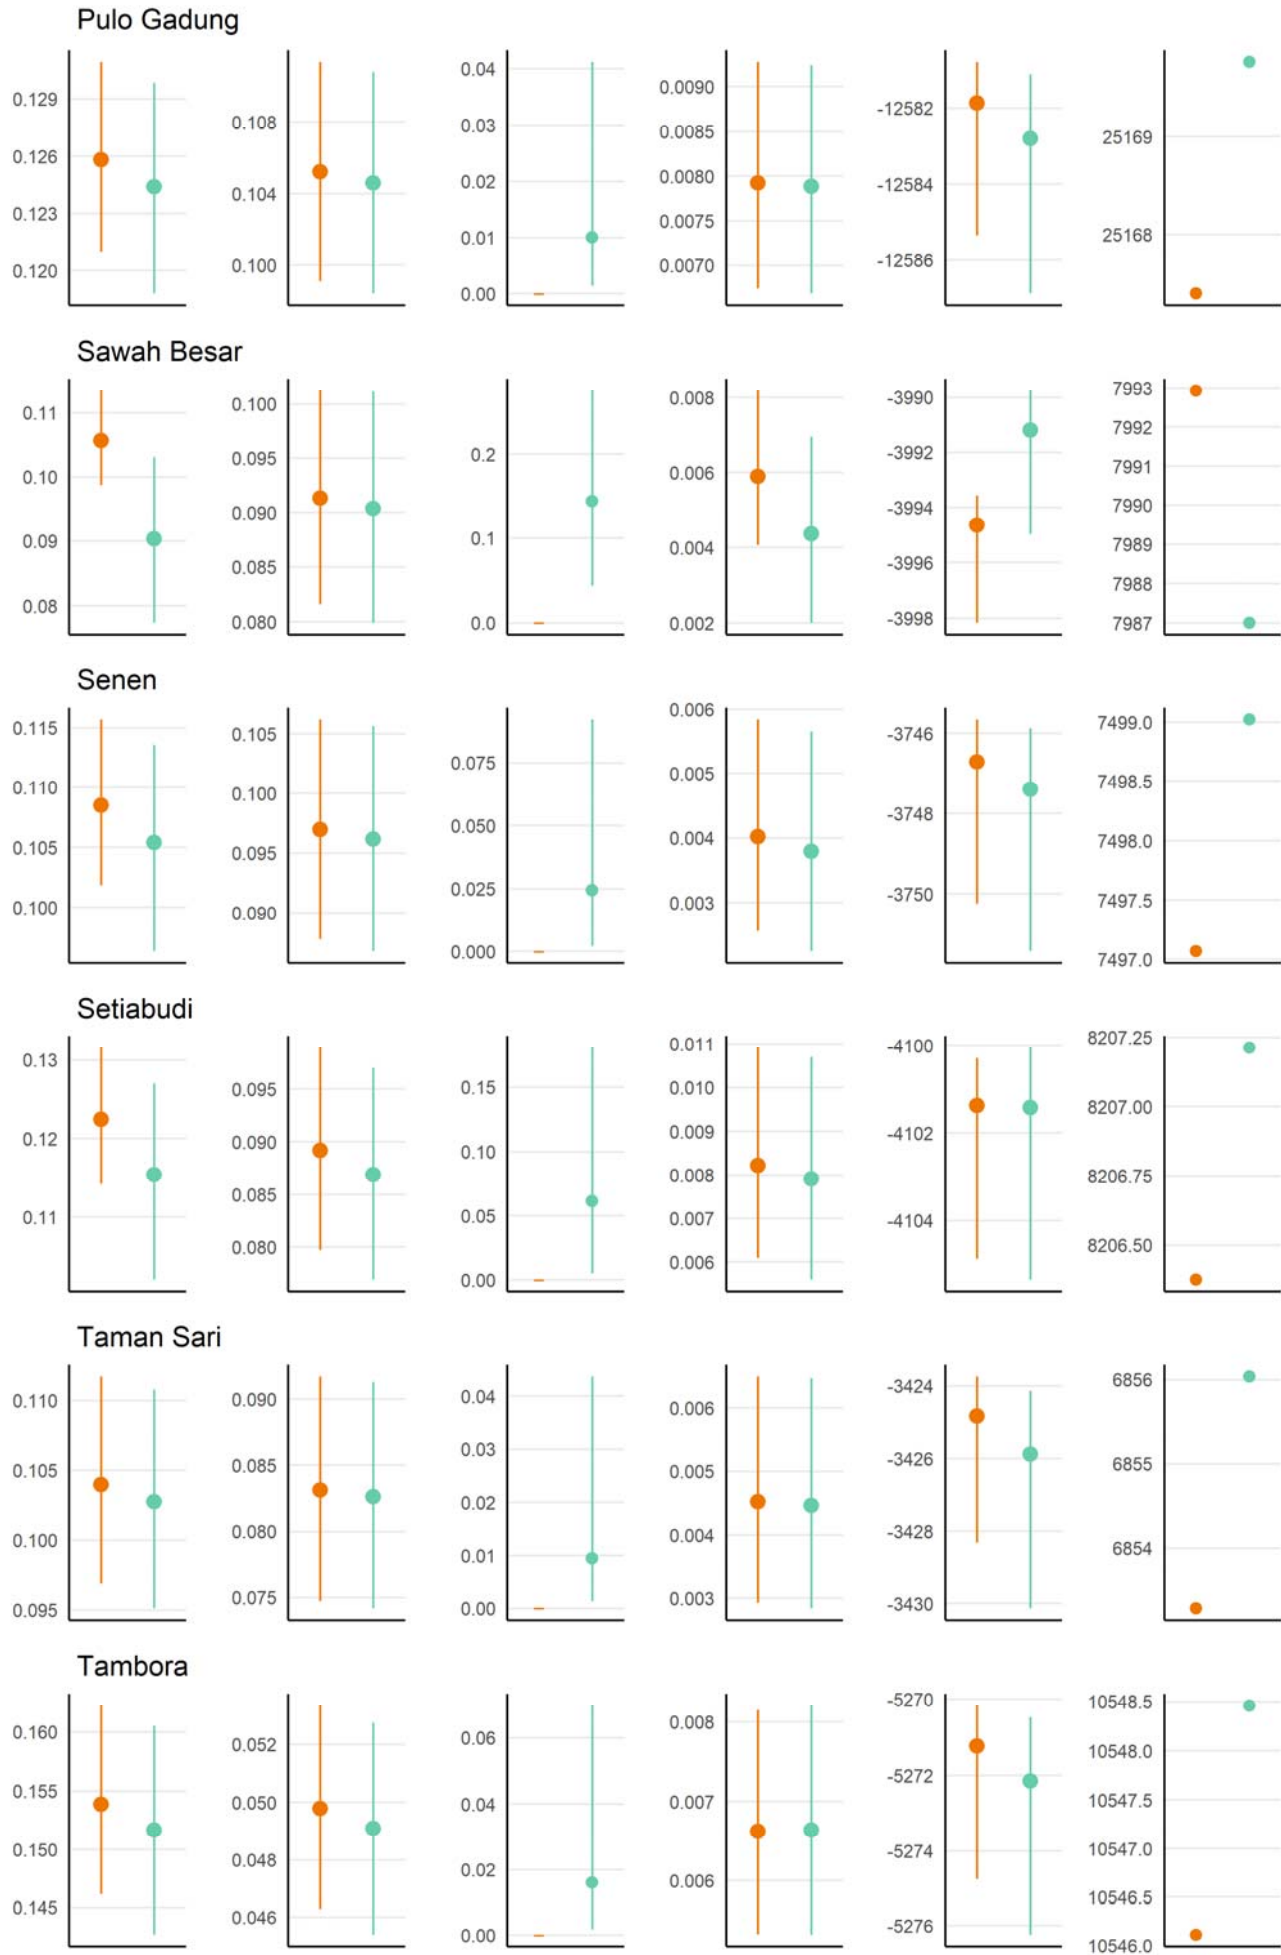

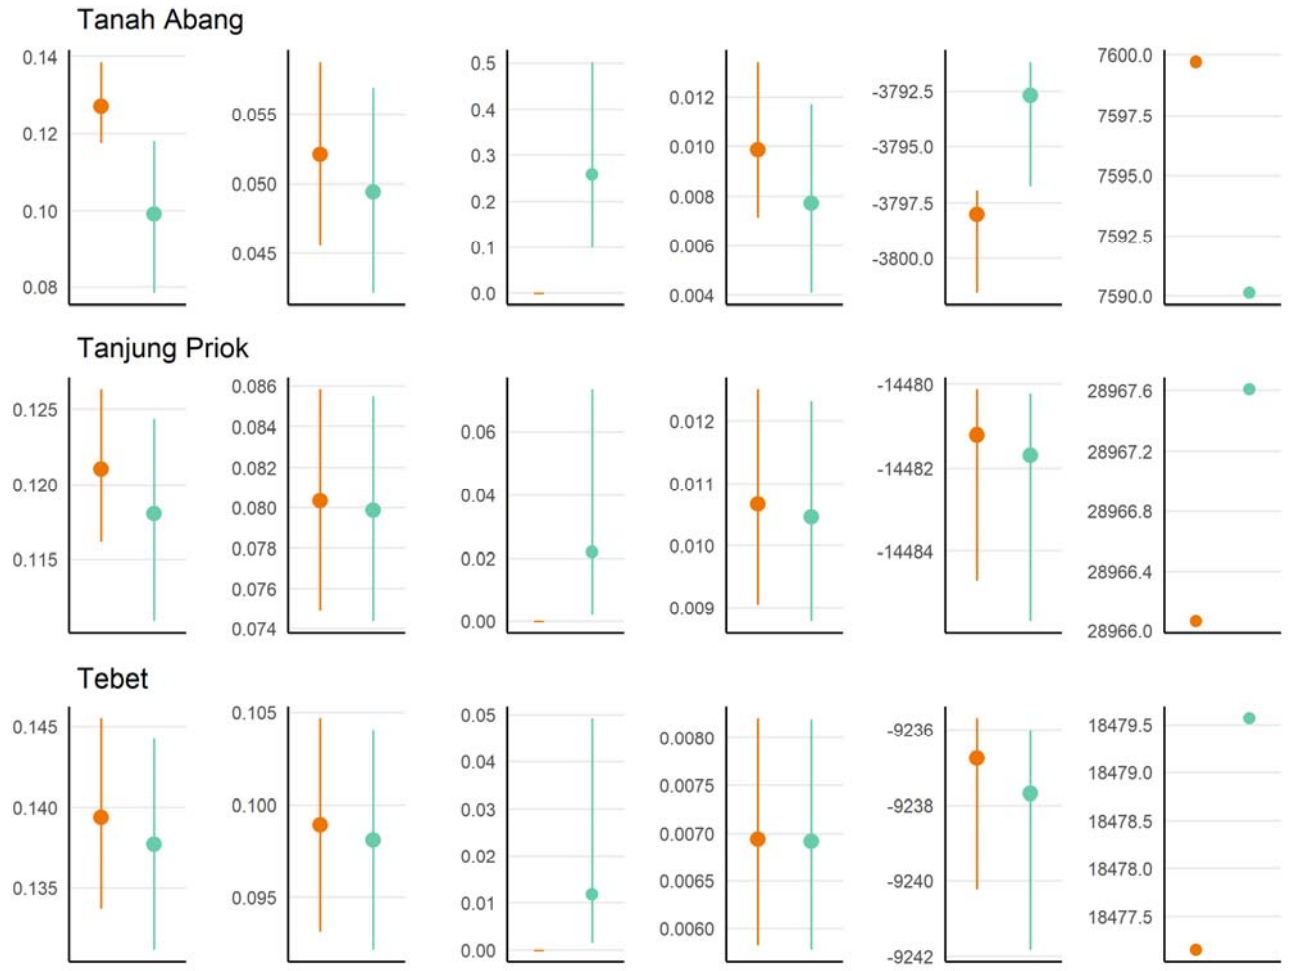

**Figure S3.** Fit of model variants *S* (orange line and ribbon, indicating median and 95% credible intervals) and *PS* (green line and ribbon, indicating median and 95% credible intervals) to cumulative (2008-2017) DHF incidence rates by age (black points and bars, indicating mean and 95% confidence intervals calculated assuming a binomial distribution) reported in Jakarta's subdistricts.

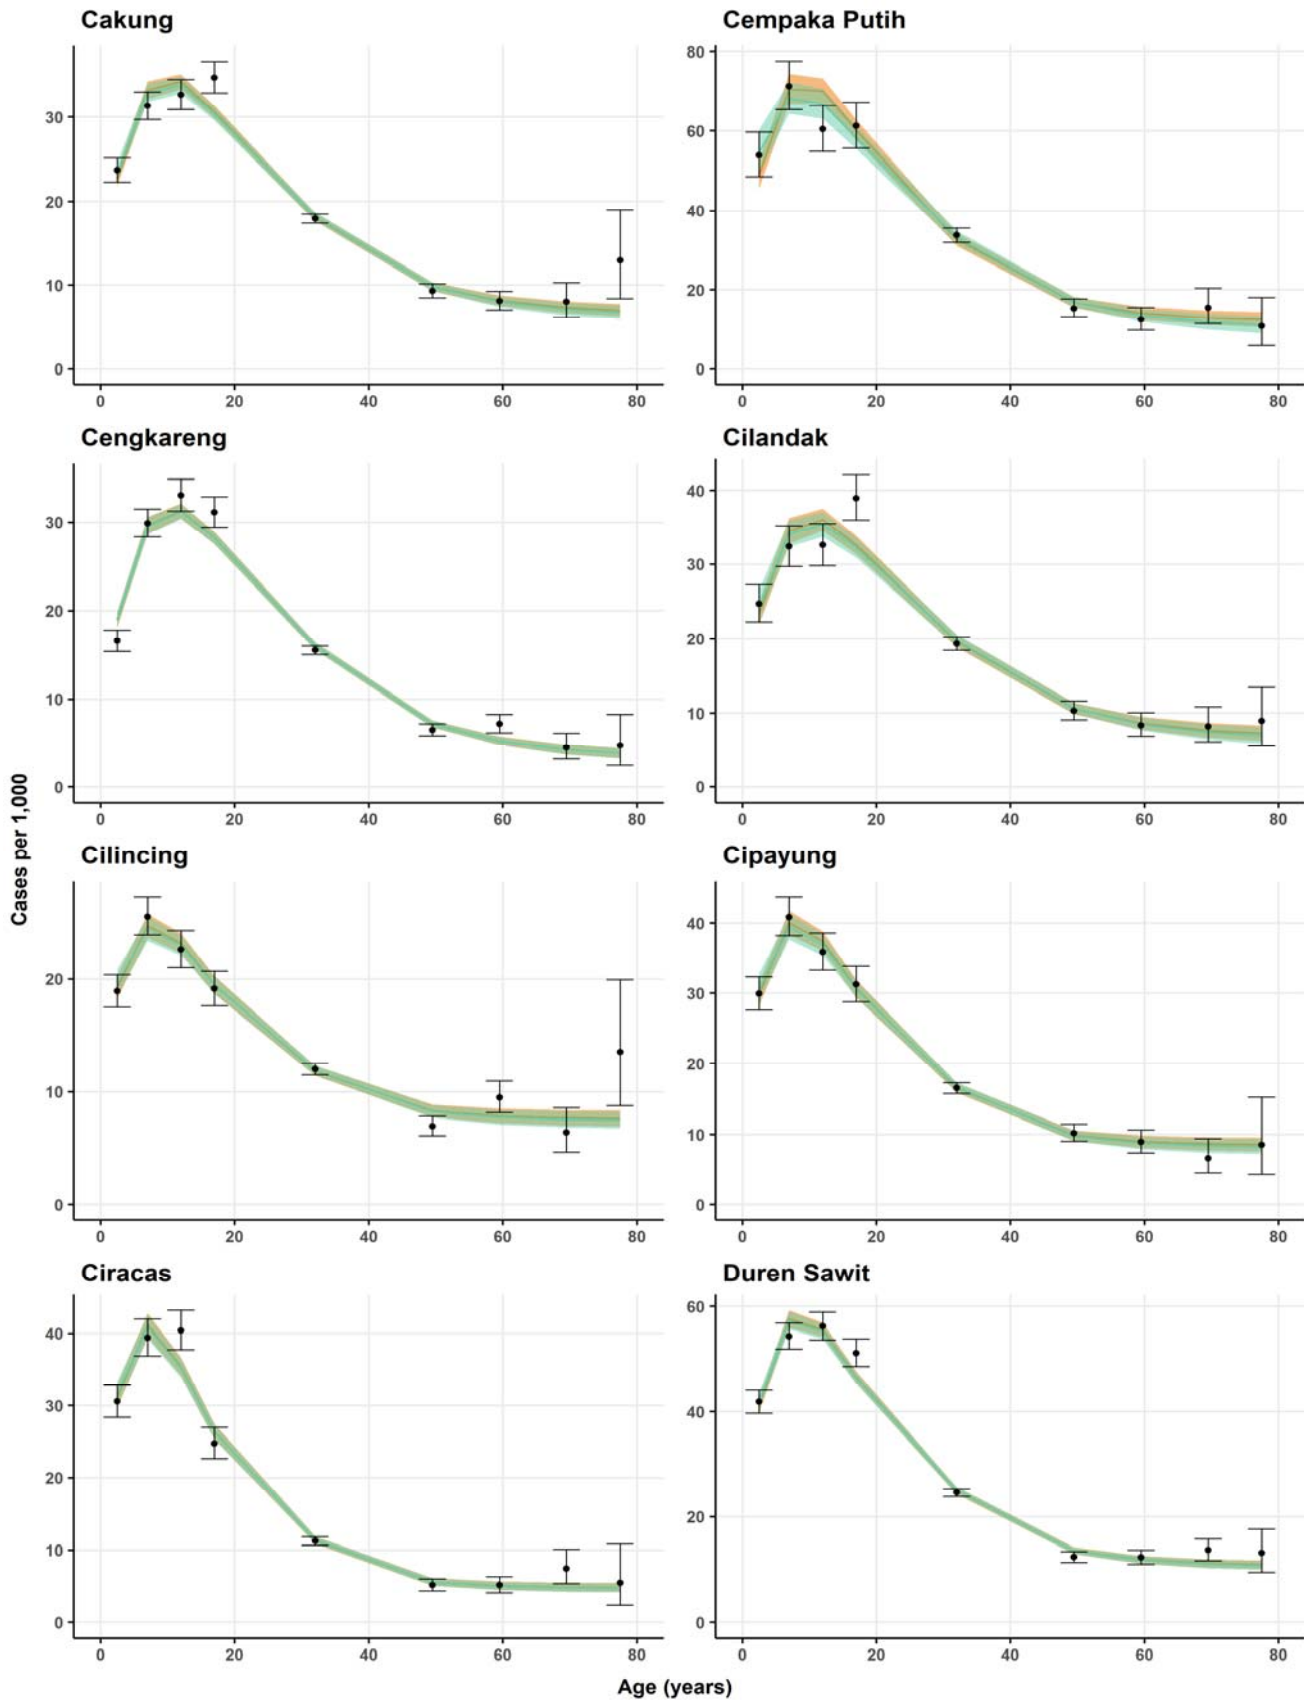



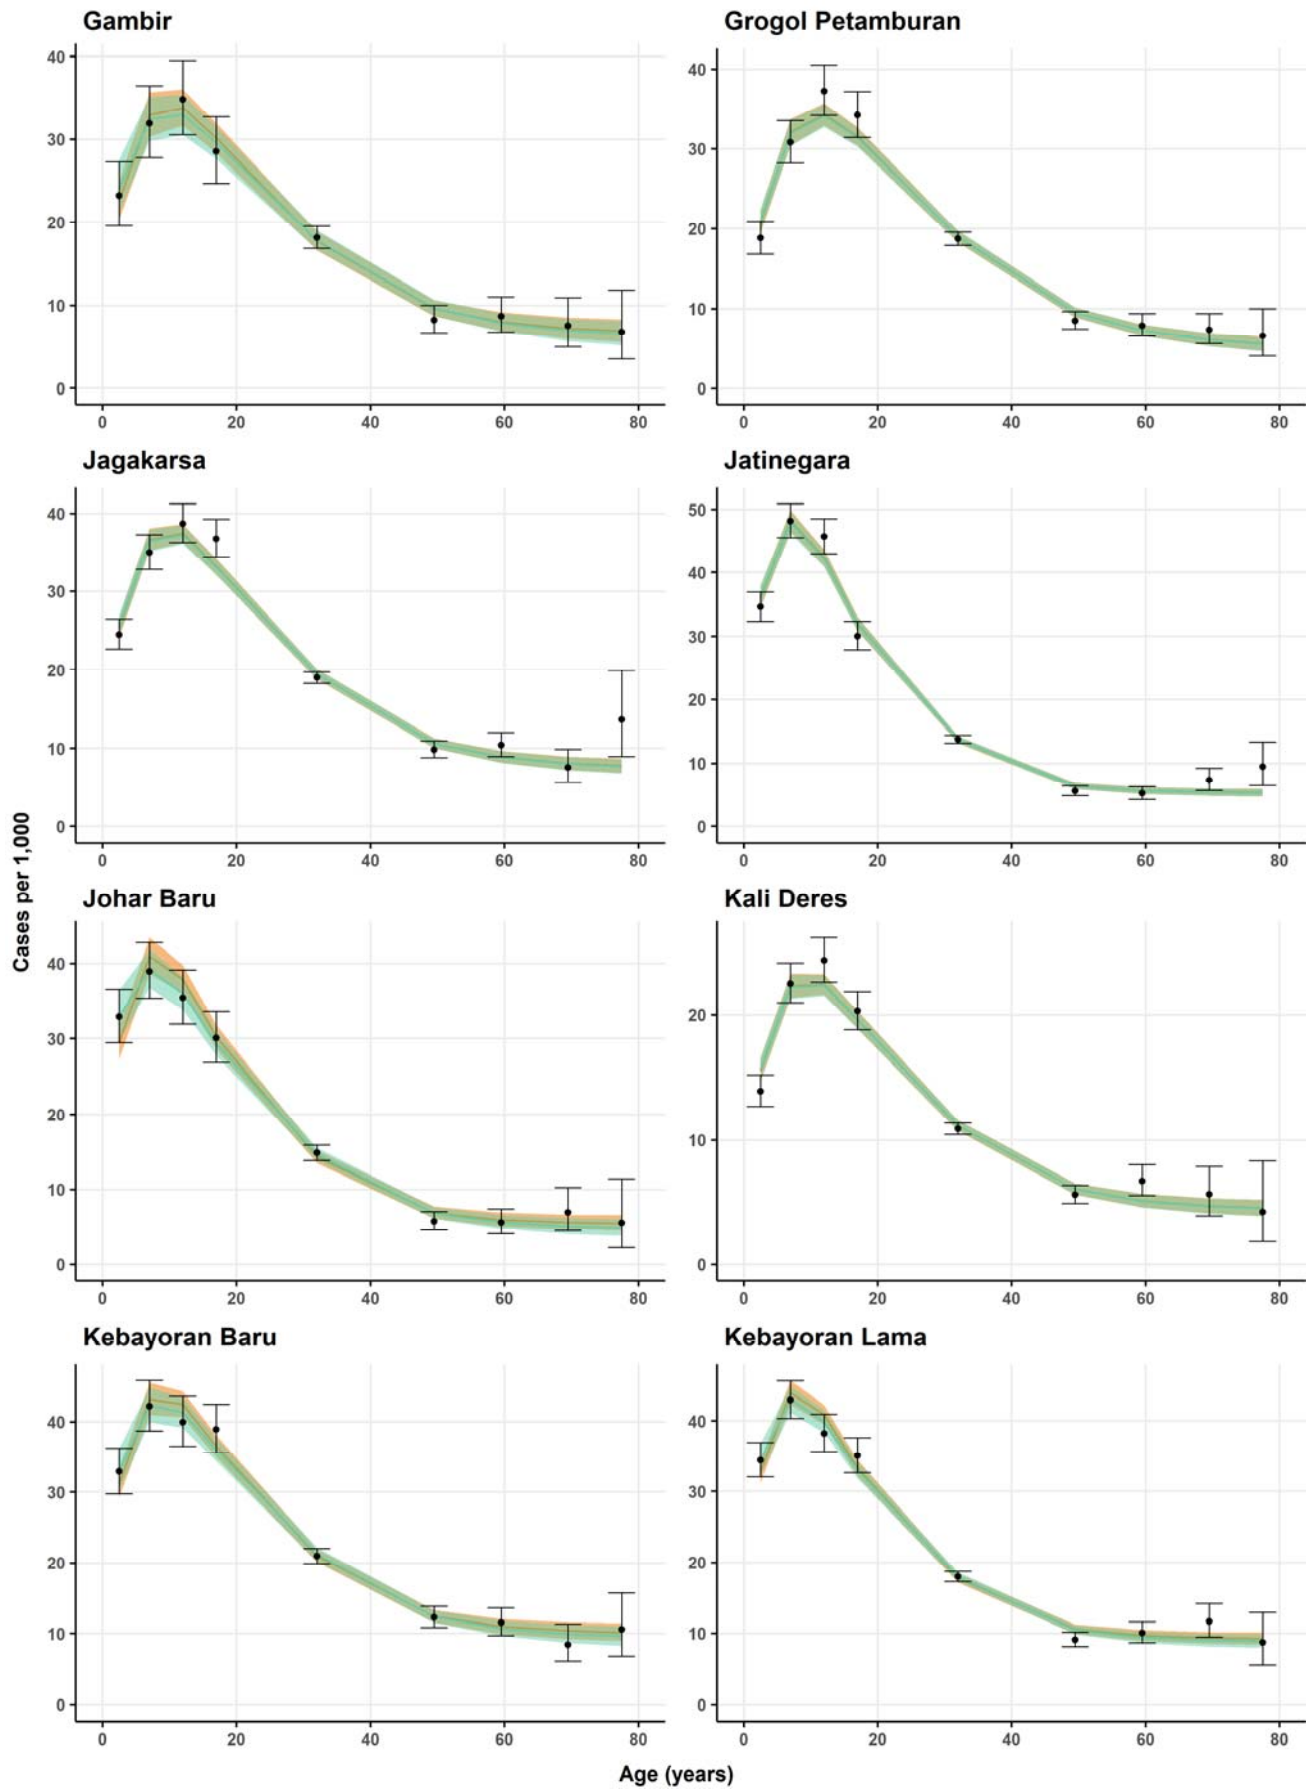

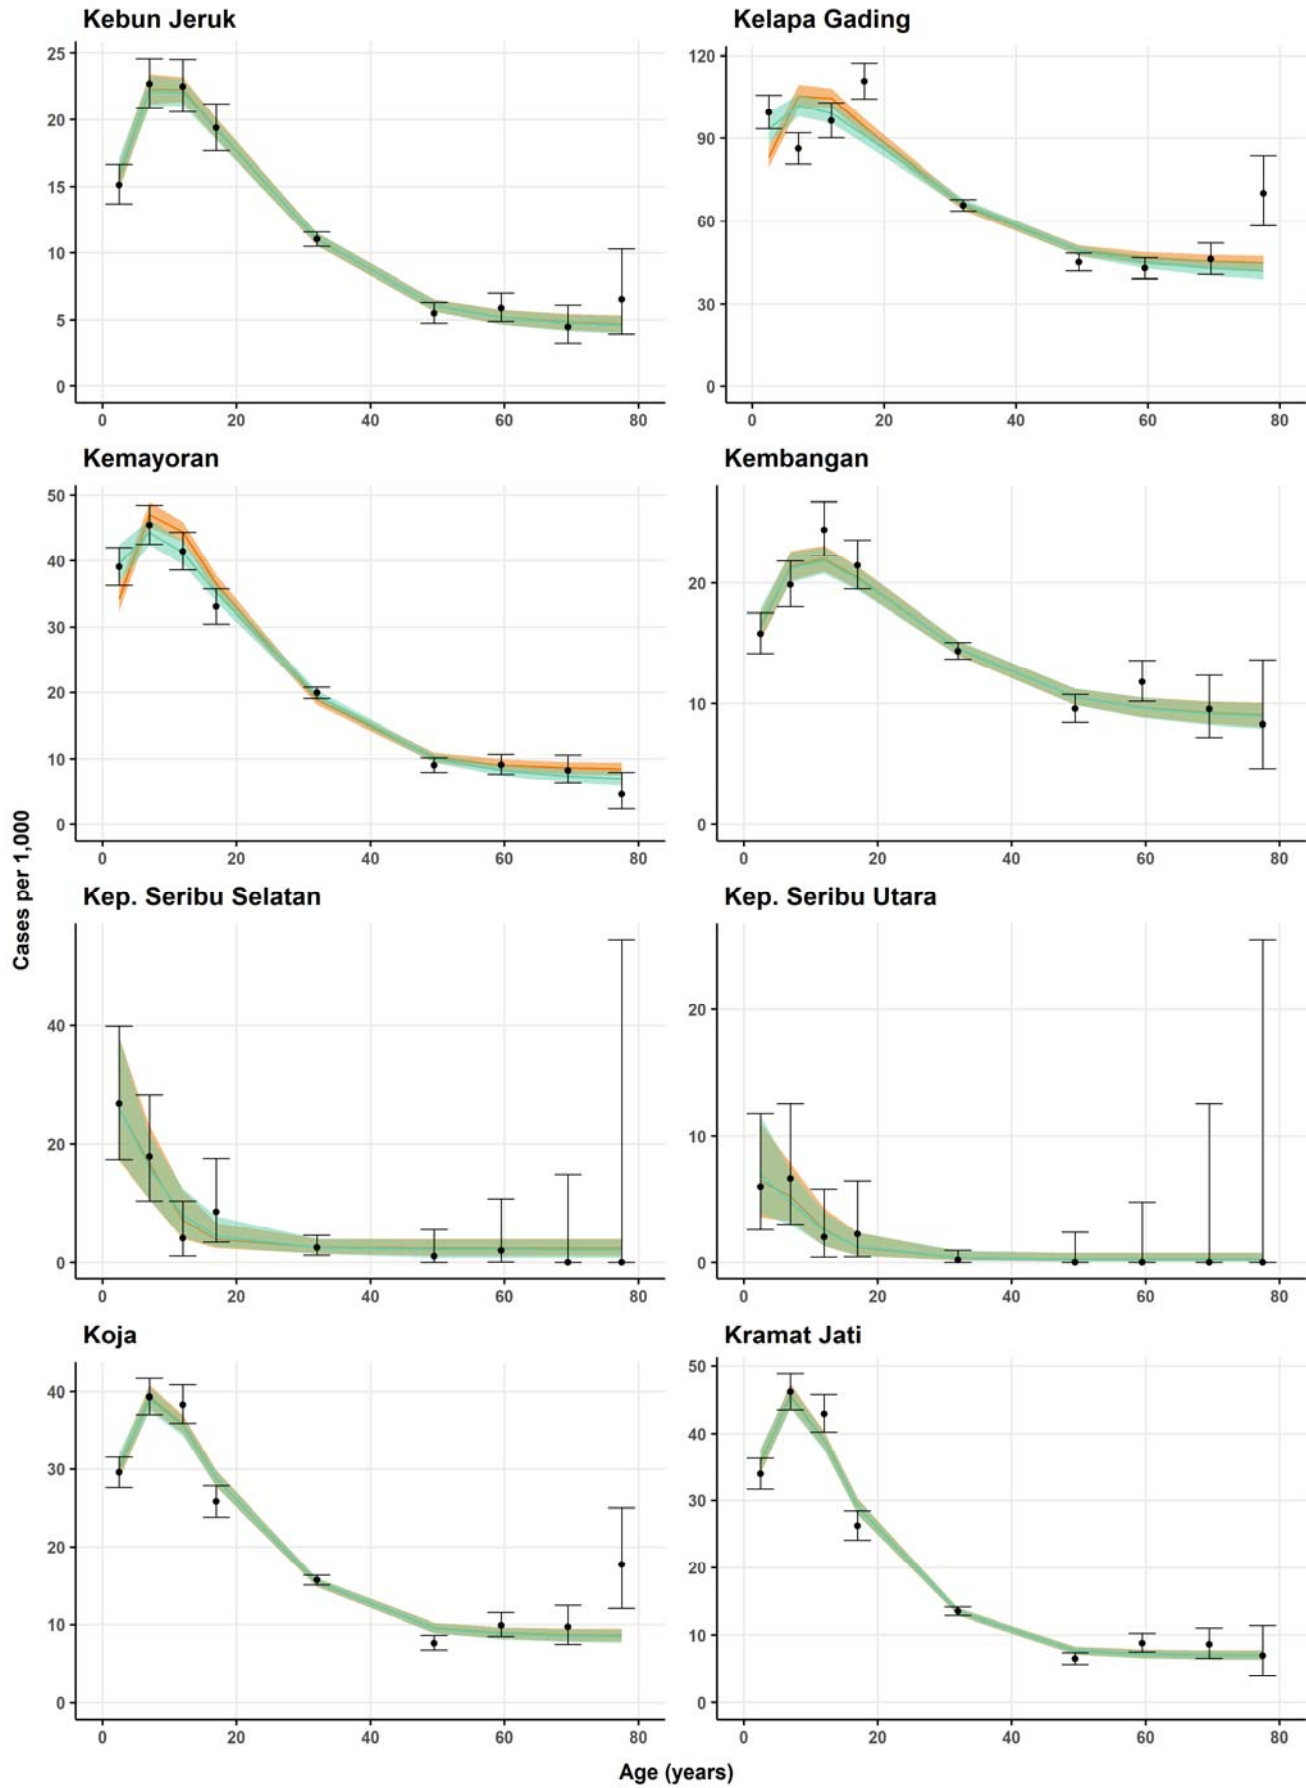

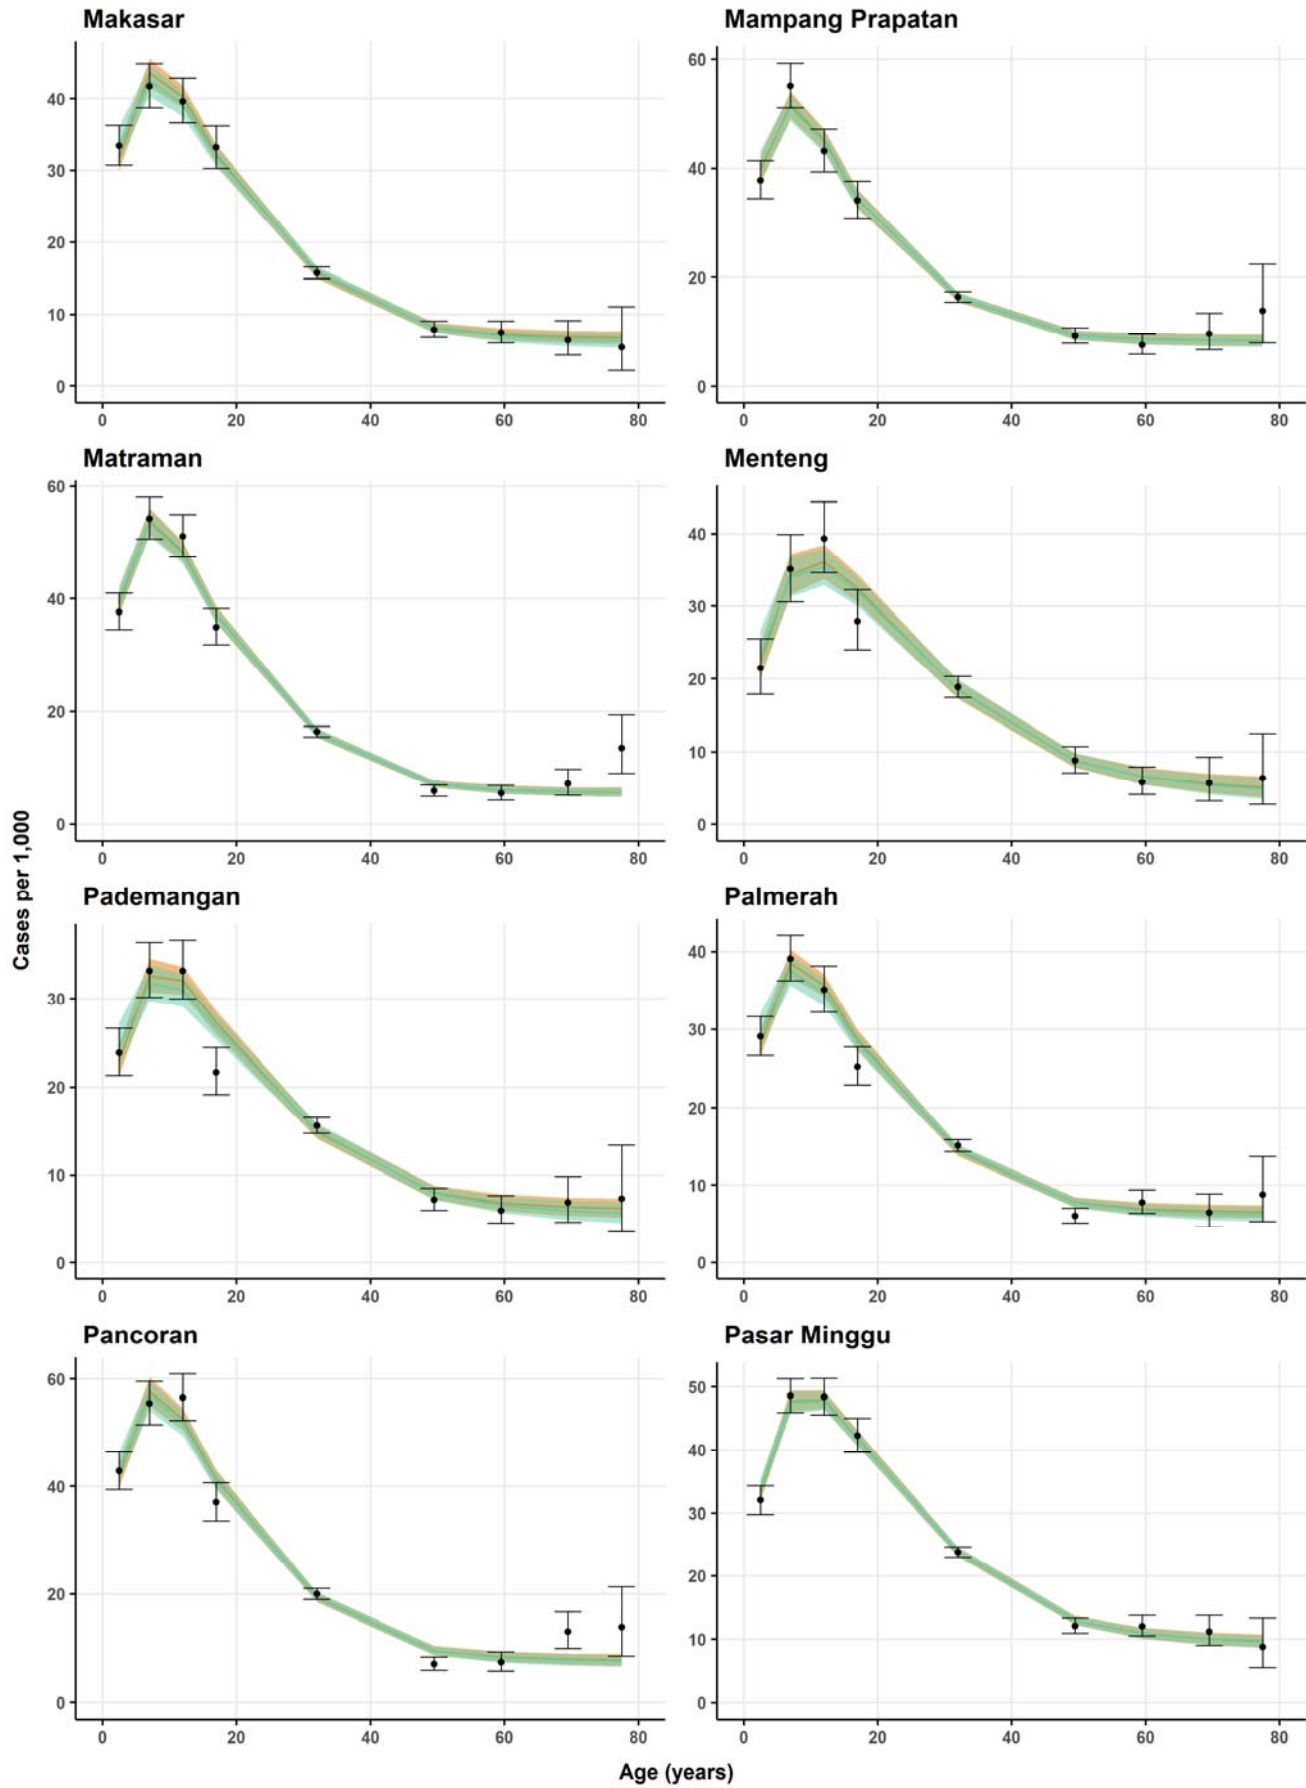

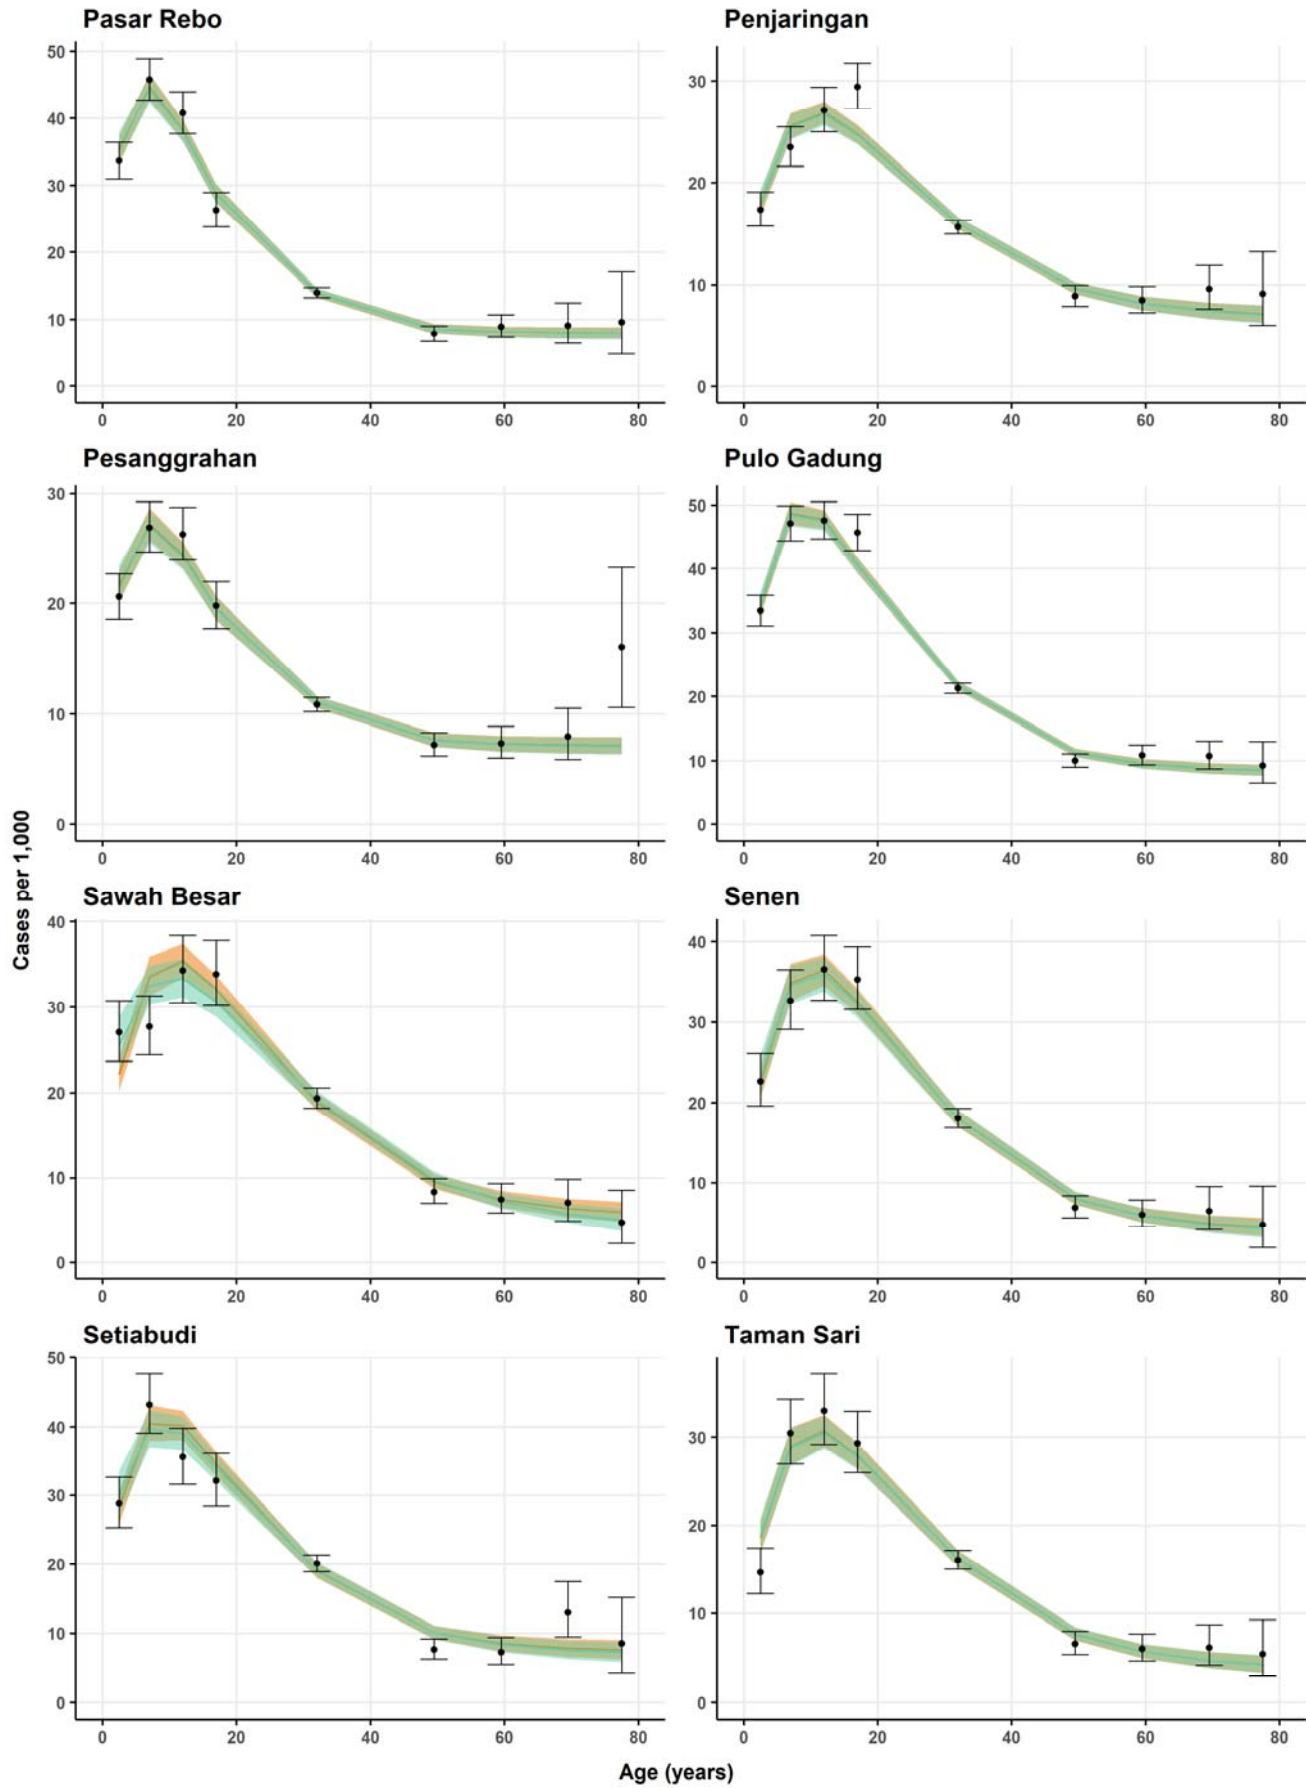

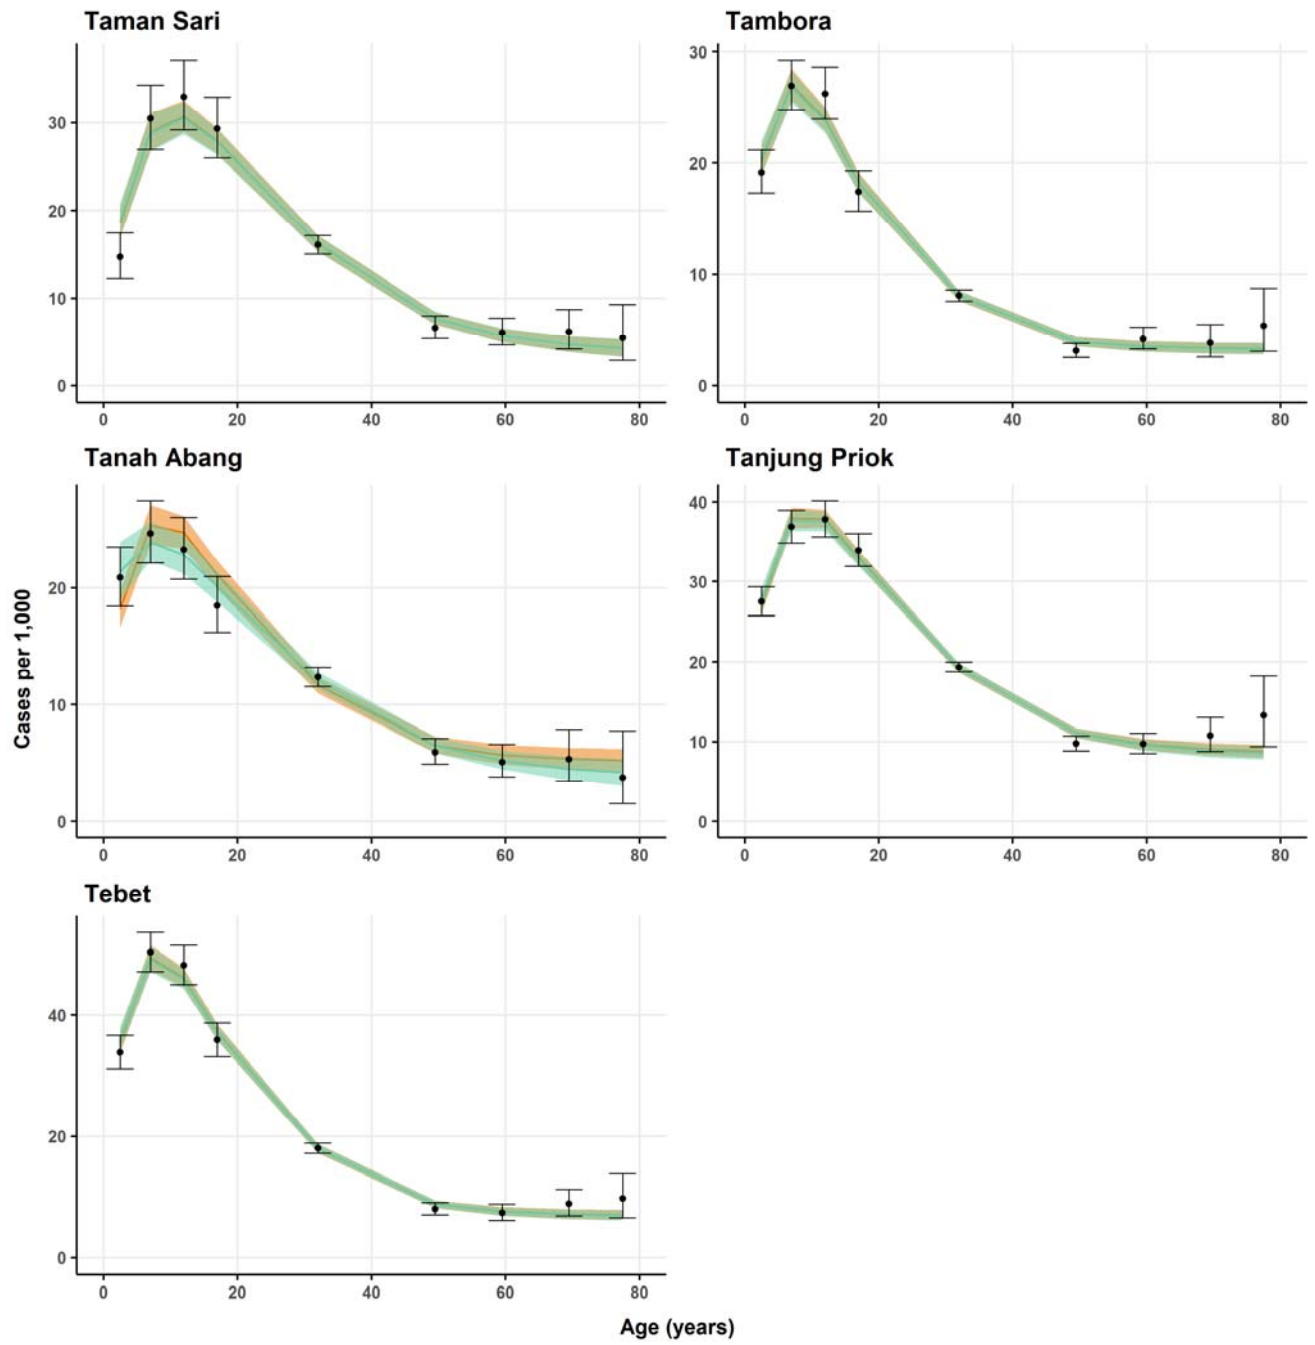

**Table S5.** Estimated total force of infection, basic reproduction numbers, the proportion of seropositive children at 9 years of age obtained by fitting model PS to cumulative (2008-2017) DHF data reported in Jakarta's subdistricts, and subdistrict population density. The basic reproduction number (R0) was estimated under 2 assumptions: under assumption 1 we assume that primary to quaternary infections are equally infectious; under assumption 2 we assume that only primary and secondary infections are infectious and thus contribute to onward transmission. The subdistrict population density estimates are reported online (2).

| Subdistrict       | Total force of infection, $4\lambda$ , (median and 95%CrI) | Proportion of 9 year olds seropositive (median and 95%CrI) | R0 [assumption 1] (median and 95%CrI) | R0 [assumption 2] (median and 95%CrI) | Population density per km <sup>2</sup> |
|-------------------|------------------------------------------------------------|------------------------------------------------------------|---------------------------------------|---------------------------------------|----------------------------------------|
| Cakung            | 0.108 (0.101-0.113)                                        | 0.621 (0.598-0.640)                                        | 1.961 (1.892-2.020)                   | 3.112 (2.940-3.261)                   | 12,362                                 |
| Cempaka Putih     | 0.108 (0.096-0.121)                                        | 0.623 (0.578-0.662)                                        | 2.099 (1.950-2.249)                   | 3.490 (3.105-3.877)                   | 18,223                                 |
| Cengkareng        | 0.105 (0.102-0.109)                                        | 0.612 (0.599-0.625)                                        | 1.948 (1.910-1.989)                   | 3.097 (2.999-3.200)                   | 19,589                                 |
| Cilandak          | 0.103 (0.093-0.111)                                        | 0.604 (0.568-0.632)                                        | 2.004 (1.893-2.099)                   | 3.243 (2.958-3.488)                   | 10,685                                 |
| Cilincing         | 0.138 (0.126-0.149)                                        | 0.711 (0.677-0.739)                                        | 2.265 (2.131-2.392)                   | 3.866 (3.535-4.176)                   | 8,923                                  |
| Cipayung          | 0.135 (0.124-0.146)                                        | 0.704 (0.671-0.730)                                        | 2.286 (2.154-2.405)                   | 3.919 (3.593-4.208)                   | 8,215                                  |
| Ciracas           | 0.159 (0.151-0.166)                                        | 0.761 (0.743-0.776)                                        | 2.600 (2.506-2.692)                   | 4.702 (4.474-4.924)                   | 15,137                                 |
| Duren Sawit       | 0.129 (0.124-0.134)                                        | 0.687 (0.671-0.700)                                        | 2.288 (2.224-2.346)                   | 3.944 (3.785-4.090)                   | 17,637                                 |
| Gambir            | 0.106 (0.091-0.119)                                        | 0.614 (0.558-0.657)                                        | 2.122 (1.933-2.291)                   | 3.576 (3.078-4.021)                   | 10,438                                 |
| Grogol Petamburan | 0.100 (0.095-0.106)                                        | 0.595 (0.574-0.615)                                        | 2.019 (1.952-2.089)                   | 3.307 (3.131-3.490)                   | 20,539                                 |
| Jagakarsa         | 0.113 (0.107-0.118)                                        | 0.637 (0.617-0.656)                                        | 2.046 (1.981-2.110)                   | 3.325 (3.162-3.485)                   | 12,304                                 |
| Jatinegara        | 0.154 (0.148-0.160)                                        | 0.75 (0.736-0.764)                                         | 2.610 (2.533-2.689)                   | 4.731 (4.544-4.920)                   | 25,865                                 |
| Johar Baru        | 0.126 (0.111-0.140)                                        | 0.678 (0.633-0.716)                                        | 2.238 (2.070-2.410)                   | 3.821 (3.395-4.252)                   | 49,162                                 |
| Kali Deres        | 0.118 (0.111-0.124)                                        | 0.653 (0.632-0.673)                                        | 2.061 (1.993-2.134)                   | 3.383 (3.209-3.567)                   | 13,881                                 |
| Kebayoran Baru    | 0.117 (0.103-0.129)                                        | 0.651 (0.605-0.687)                                        | 2.202 (2.035-2.353)                   | 3.760 (3.329-4.147)                   | 11,163                                 |
| Kebayoran Lama    | 0.134 (0.123-0.144)                                        | 0.701 (0.671-0.726)                                        | 2.366 (2.237-2.490)                   | 4.169 (3.841-4.480)                   | 15,157                                 |
| Kebun Jeruk       | 0.118 (0.109-0.126)                                        | 0.655 (0.627-0.679)                                        | 2.154 (2.054-2.249)                   | 3.632 (3.374-3.874)                   | 19,434                                 |
| Kelapa Gading     | 0.098 (0.086-0.111)                                        | 0.588 (0.537-0.632)                                        | 2.024 (1.867-2.185)                   | 3.327 (2.912-3.752)                   | 9,607                                  |
| Kemayoran         | 0.111 (0.099-0.123)                                        | 0.631 (0.589-0.668)                                        | 2.085 (1.948-2.223)                   | 3.432 (3.083-3.781)                   | 30,198                                 |
| Kembangan         | 0.105 (0.093-0.117)                                        | 0.611 (0.567-0.651)                                        | 1.984 (1.855-2.120)                   | 3.192 (2.859-3.539)                   | 10,814                                 |
| Koja              | 0.146 (0.137-0.154)                                        | 0.731 (0.708-0.750)                                        | 2.394 (2.289-2.490)                   | 4.185 (3.930-4.420)                   | 25,195                                 |
| Kramat Jati       | 0.164 (0.156-0.171)                                        | 0.771 (0.754-0.786)                                        | 2.667 (2.572-2.764)                   | 4.843 (4.618-5.073)                   | 20,671                                 |
| Makasar           | 0.134 (0.123-0.145)                                        | 0.702 (0.669-0.729)                                        | 2.323 (2.187-2.450)                   | 4.028 (3.689-4.342)                   | 8,751                                  |

|                  |                     |                     |                     |                     |        |
|------------------|---------------------|---------------------|---------------------|---------------------|--------|
| Mampang Prapatan | 0.156 (0.145-0.167) | 0.754 (0.729-0.777) | 2.607 (2.472-2.743) | 4.759 (4.423-5.090) | 17,927 |
| Matraman         | 0.147 (0.140-0.154) | 0.734 (0.716-0.750) | 2.559 (2.466-2.650) | 4.625 (4.396-4.848) | 30,203 |
| Menteng          | 0.103 (0.091-0.113) | 0.603 (0.557-0.639) | 2.045 (1.900-2.175) | 3.351 (2.978-3.687) | 10,506 |
| Pademangan       | 0.115 (0.101-0.128) | 0.646 (0.597-0.685) | 2.117 (1.952-2.268) | 3.533 (3.108-3.919) | 12,239 |
| Palmerah         | 0.134 (0.122-0.145) | 0.701 (0.666-0.729) | 2.347 (2.200-2.480) | 4.112 (3.741-4.444) | 26,998 |
| Pancoran         | 0.142 (0.132-0.150) | 0.721 (0.696-0.741) | 2.446 (2.330-2.551) | 4.352 (4.063-4.611) | 16,703 |
| Pasar Minggu     | 0.117 (0.112-0.123) | 0.651 (0.634-0.668) | 2.131 (2.068-2.195) | 3.559 (3.397-3.719) | 13,345 |
| Pasar Rebo       | 0.164 (0.153-0.174) | 0.771 (0.748-0.791) | 2.644 (2.517-2.773) | 4.797 (4.493-5.103) | 14,599 |
| Penjaringan      | 0.103 (0.096-0.109) | 0.603 (0.577-0.626) | 1.984 (1.906-2.063) | 3.196 (2.994-3.400) | 8,461  |
| Pesanggrahan     | 0.153 (0.140-0.166) | 0.747 (0.716-0.775) | 2.542 (2.386-2.704) | 4.569 (4.185-4.962) | 15,678 |
| Pulo Gadung      | 0.124 (0.119-0.130) | 0.674 (0.657-0.689) | 2.265 (2.197-2.332) | 3.903 (3.730-4.072) | 17,506 |
| Sawah Besar      | 0.090 (0.077-0.103) | 0.556 (0.502-0.604) | 1.923 (1.769-2.080) | 3.050 (2.650-3.464) | 18,817 |
| Senen            | 0.105 (0.096-0.114) | 0.613 (0.580-0.640) | 2.057 (1.950-2.156) | 3.387 (3.108-3.643) | 21,710 |
| Setiabudi        | 0.115 (0.102-0.127) | 0.646 (0.601-0.681) | 2.165 (2.004-2.307) | 3.665 (3.250-4.029) | 14,558 |
| Taman Sari       | 0.103 (0.095-0.111) | 0.603 (0.575-0.631) | 2.091 (1.994-2.195) | 3.509 (3.251-3.787) | 24,062 |
| Tambora          | 0.152 (0.143-0.161) | 0.745 (0.723-0.764) | 2.611 (2.493-2.728) | 4.826 (4.527-5.121) | 44,200 |
| Tanah Abang      | 0.099 (0.078-0.118) | 0.59 (0.506-0.654)  | 1.950 (1.723-2.168) | 3.092 (2.515-3.646) | 14434  |
| Tanjung Priok    | 0.118 (0.111-0.124) | 0.654 (0.631-0.673) | 2.136 (2.054-2.209) | 3.578 (3.367-3.764) | 16850  |
| Tebet            | 0.138 (0.131-0.144) | 0.711 (0.693-0.727) | 2.448 (2.364-2.532) | 4.365 (4.155-4.574) | 22167  |



#### 4.3 Maps of subdistrict locations, spatial autocorrelation & annual subdistrict transmission intensity

**Figure S4.** Map of Jakarta province with subdistrict and region locations.

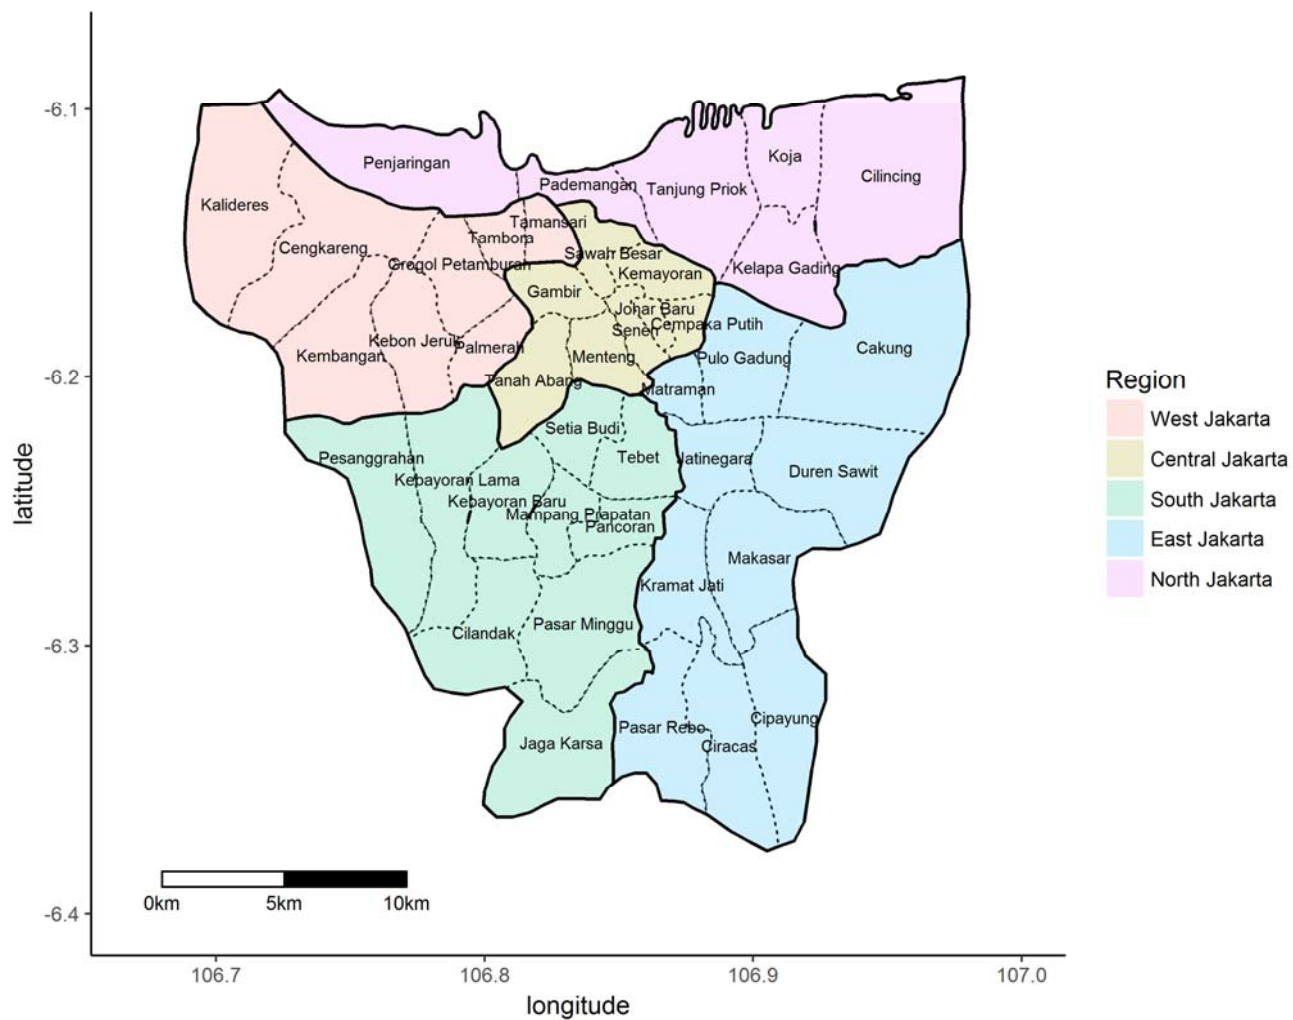

**Figure S5.** Map of local indicators of spatial association (LISA) for subdistrict total force of infection ( $4\lambda$ ) estimates. Red colour indicates spatial clustering of median transmission intensity estimates obtained from the fit of model variant PS to cumulative (2008-2017) age-stratified DHF incidence data reported in Jakarta's subdistricts.

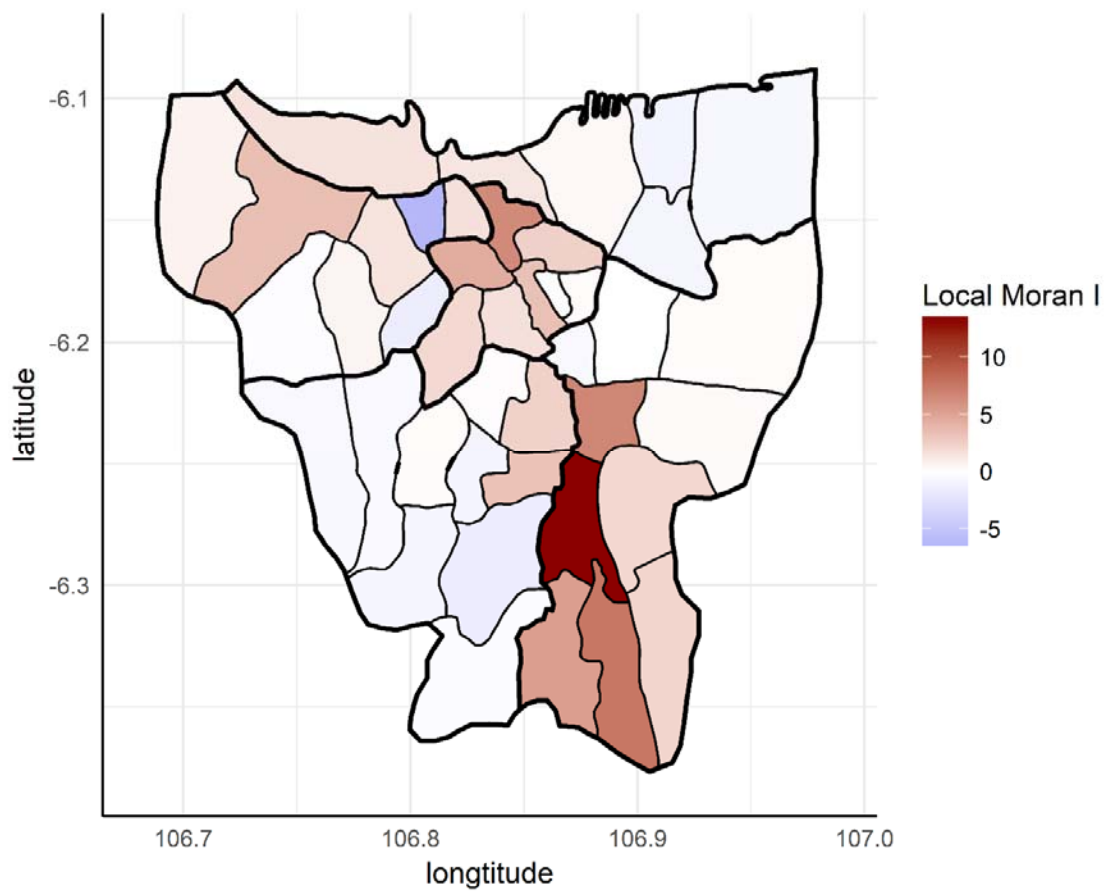

**Figure S6.** Spatial distribution of median total transmission intensity ( $4\lambda$ ) estimates obtained from the fit of model variant *PS* to yearly age-stratified DHF incidence rates reported between 2008 and 2017 in Jakarta's subdistricts. For illustrative purposes we capped the colour scale at 30% force of infection, though some estimates were higher in individual years.

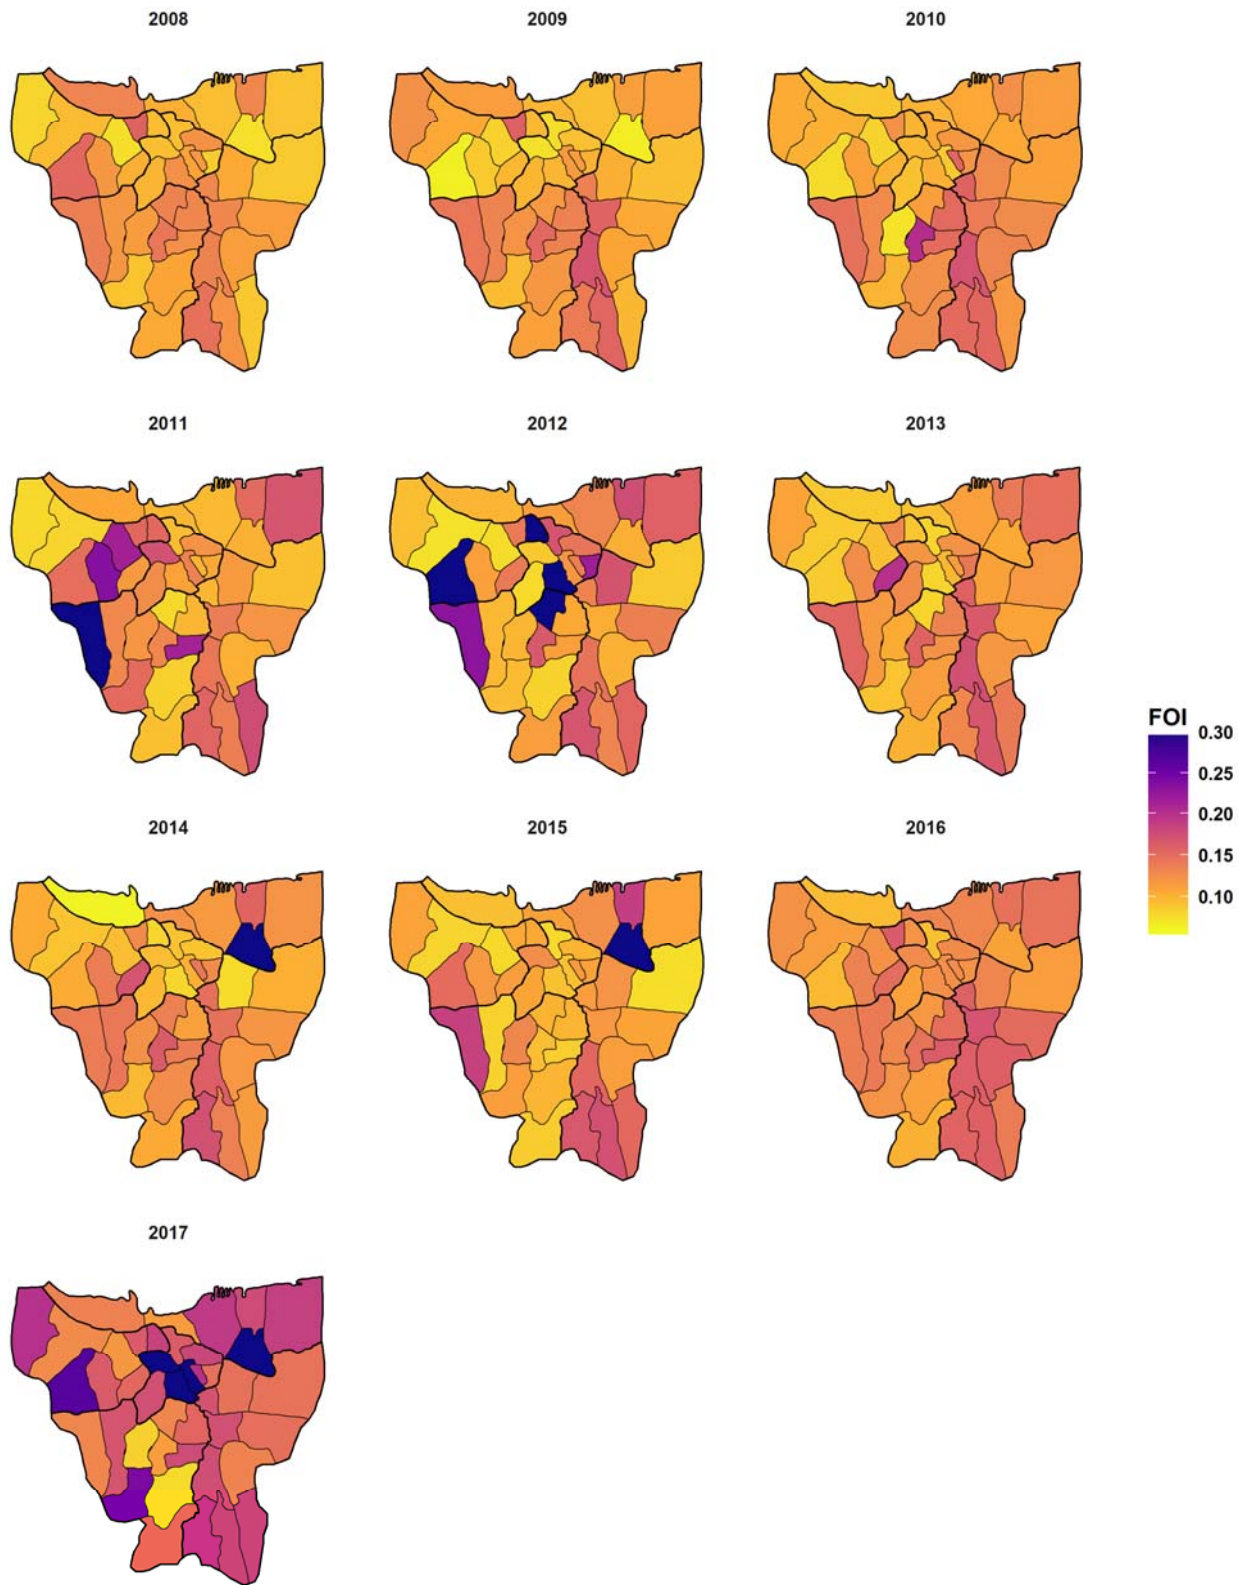

**Figure S7.** Total transmission intensity ( $4\lambda$ ) estimates, median and 95% credible intervals, obtained from the fit of model variants *S* (orange) and *PS* (green) to yearly age-stratified DHF incidence rates reported between 2008 and 2017 in Jakarta's subdistricts. All yearly parameter estimates are available in S3 Supplementary File.

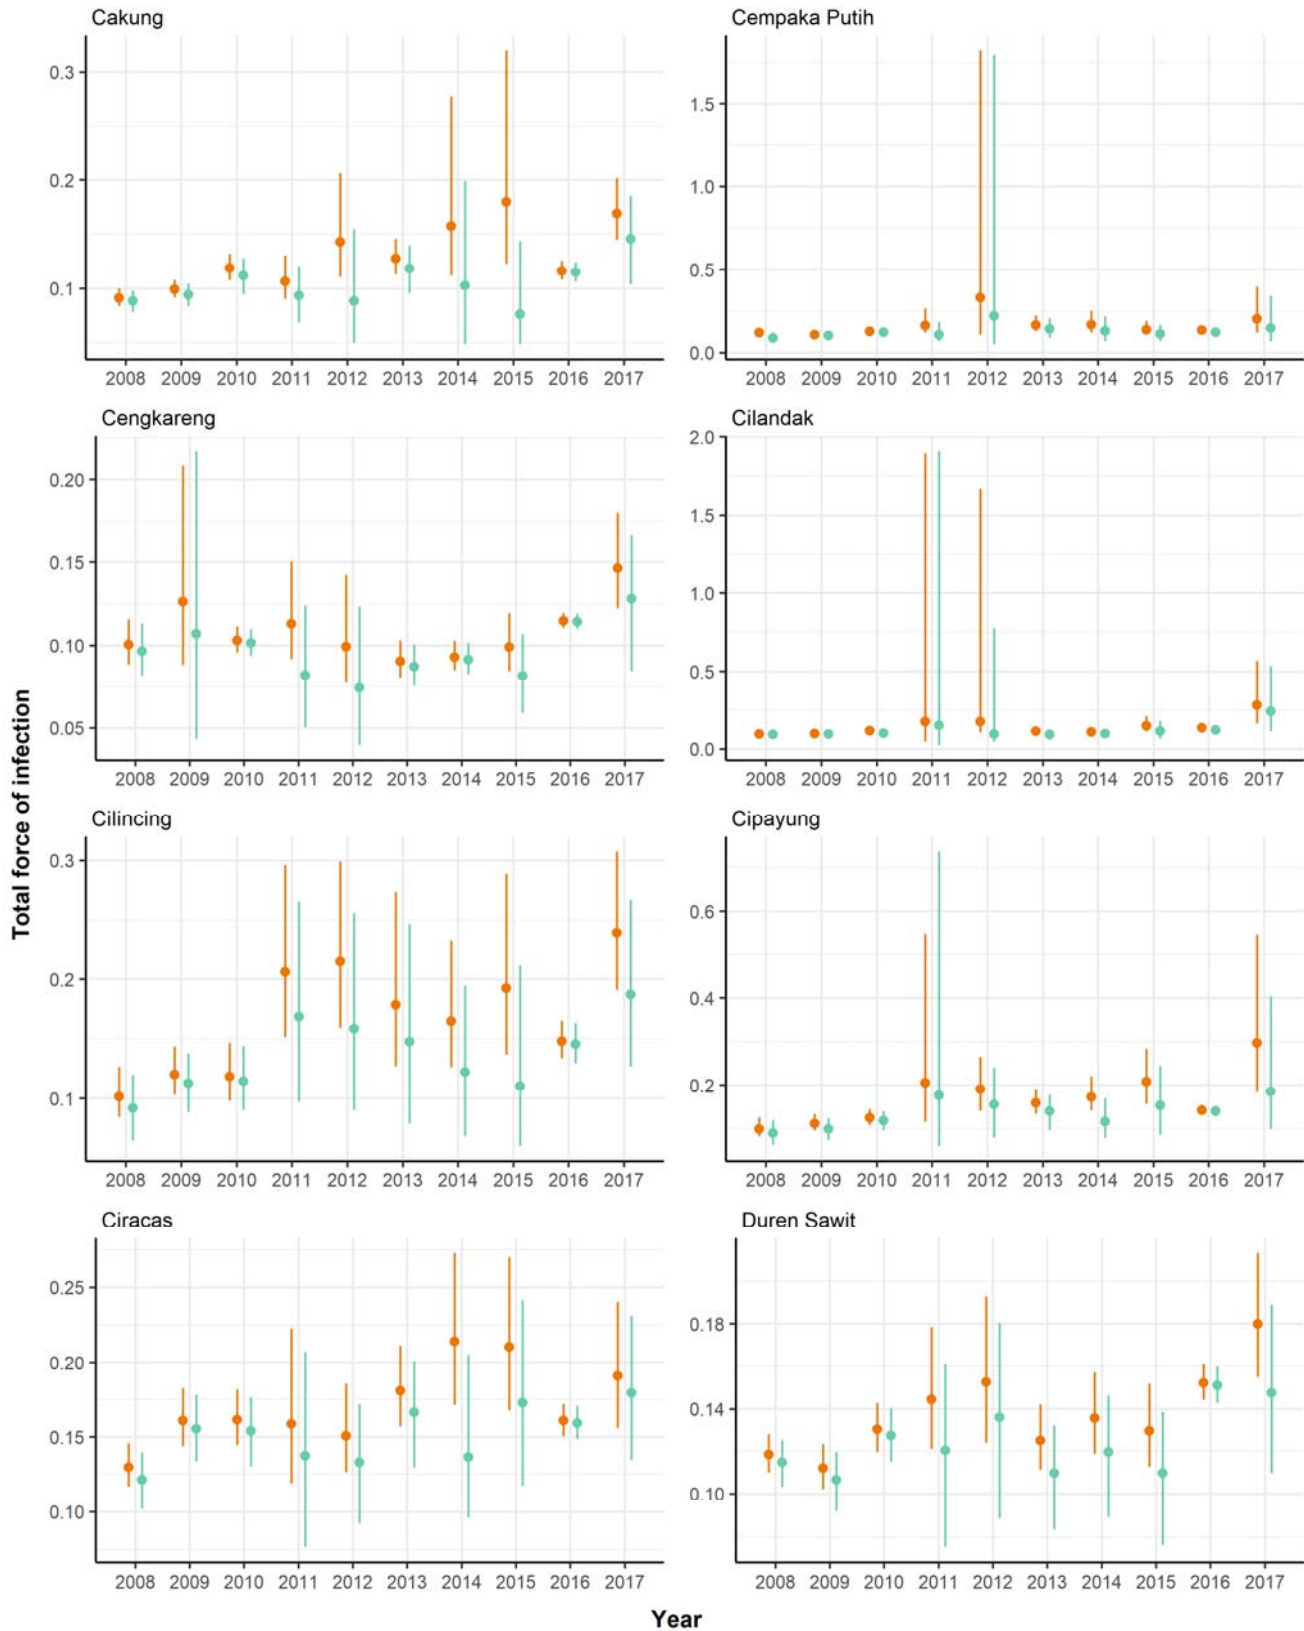

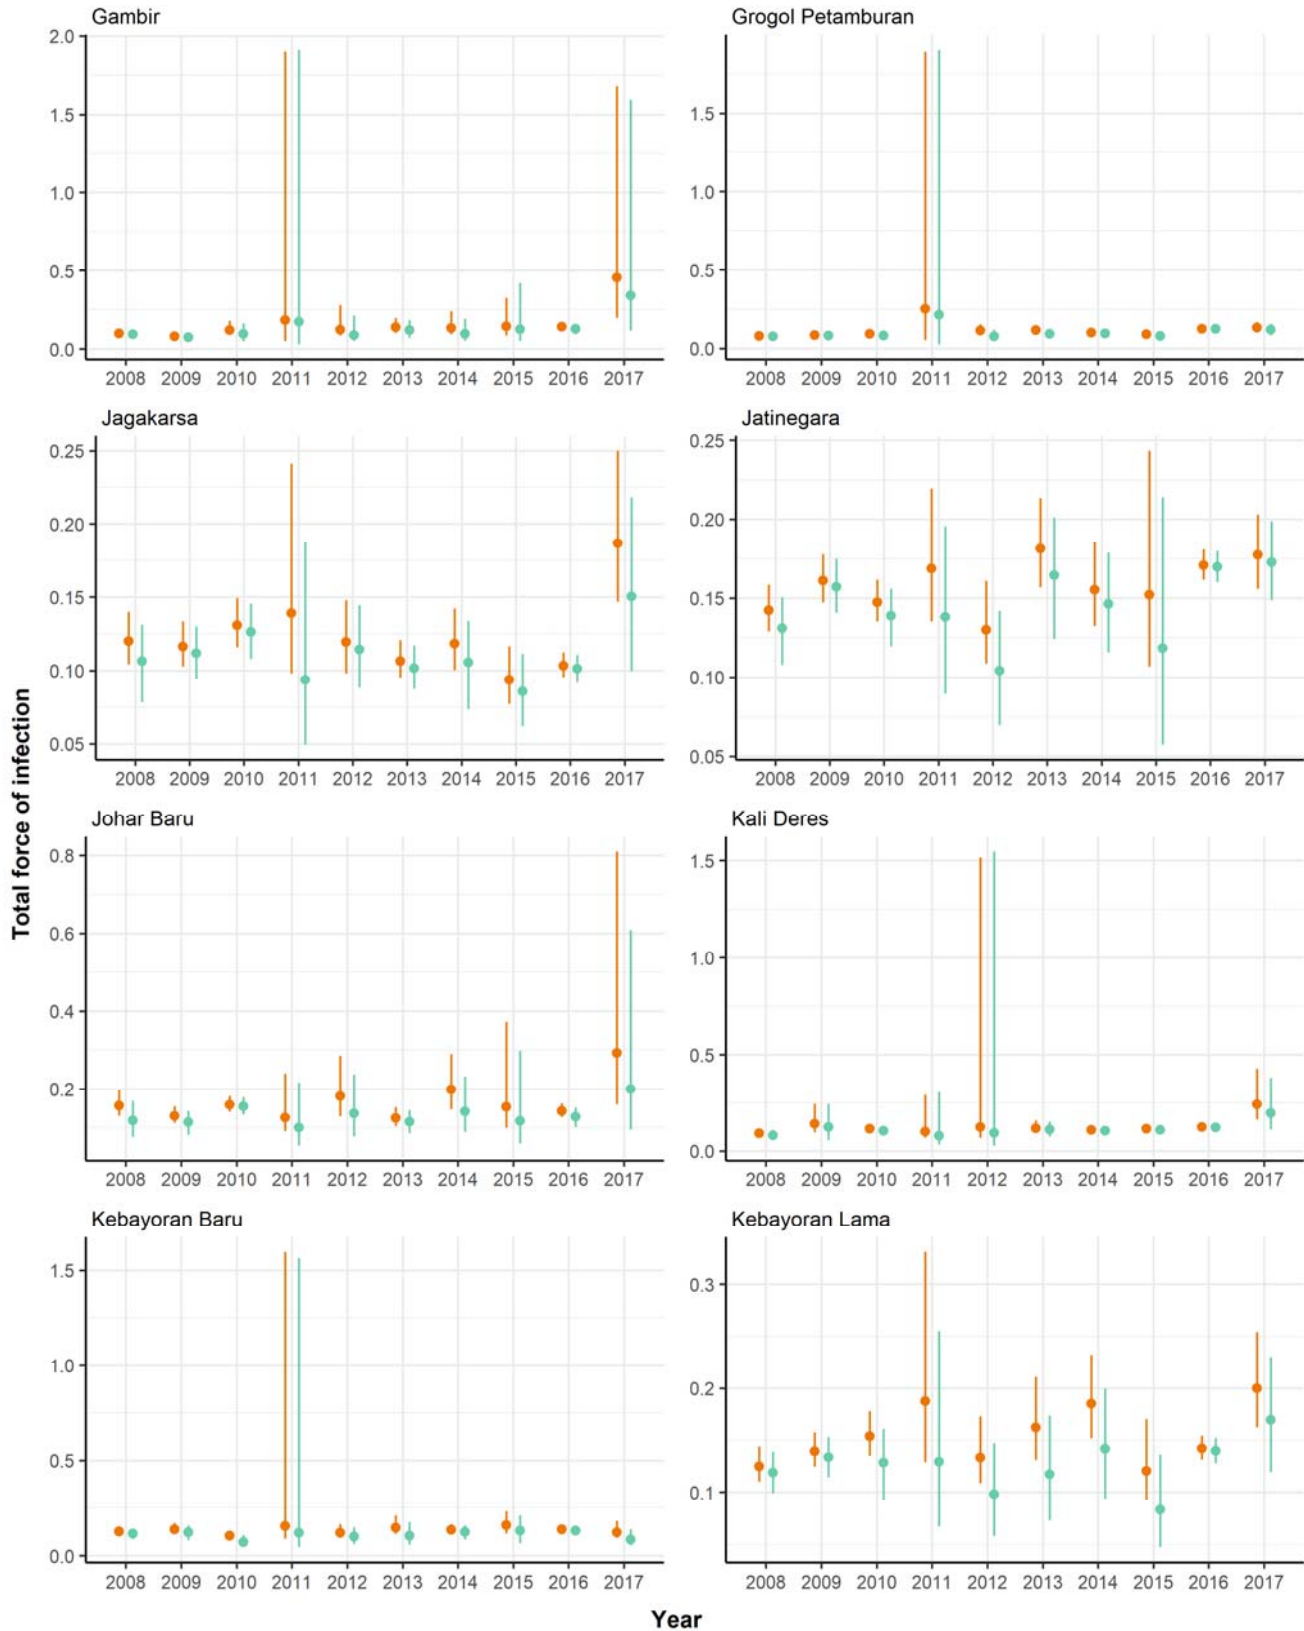



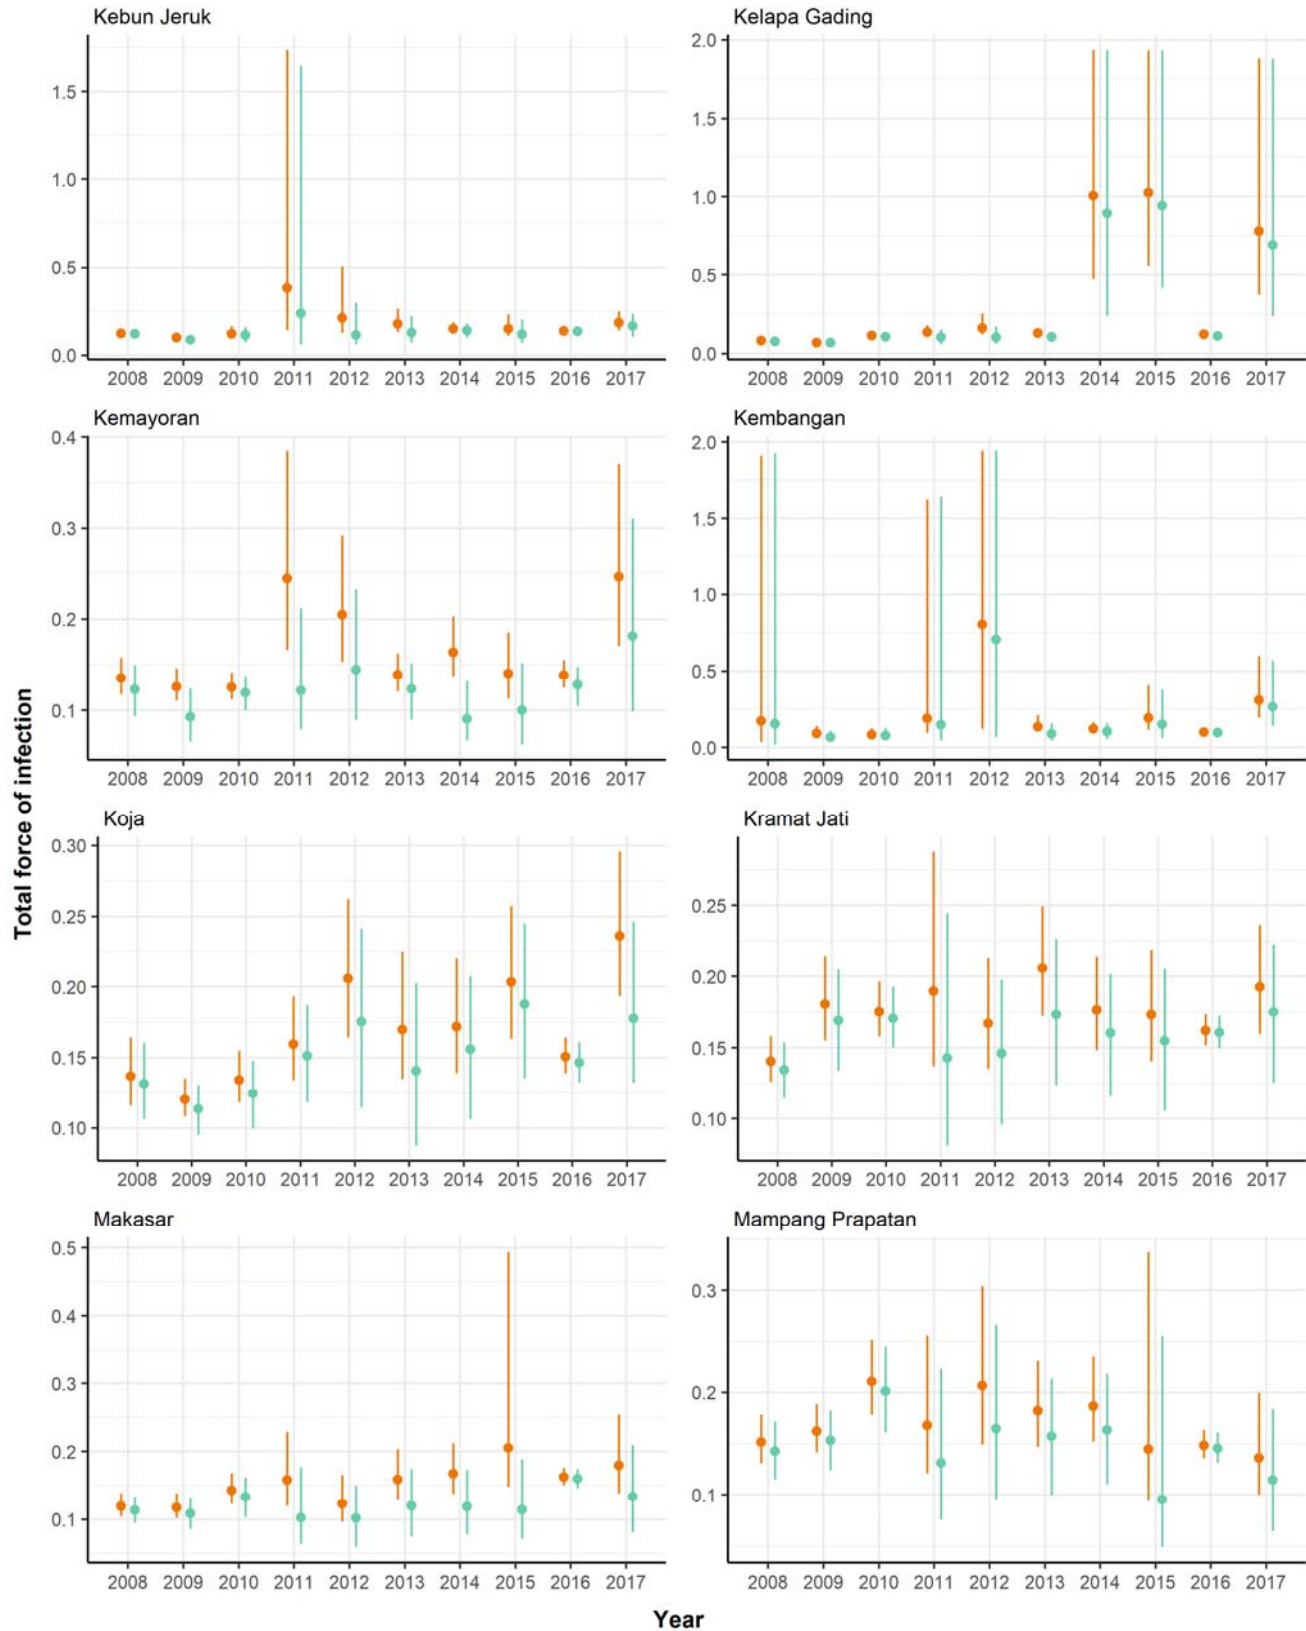

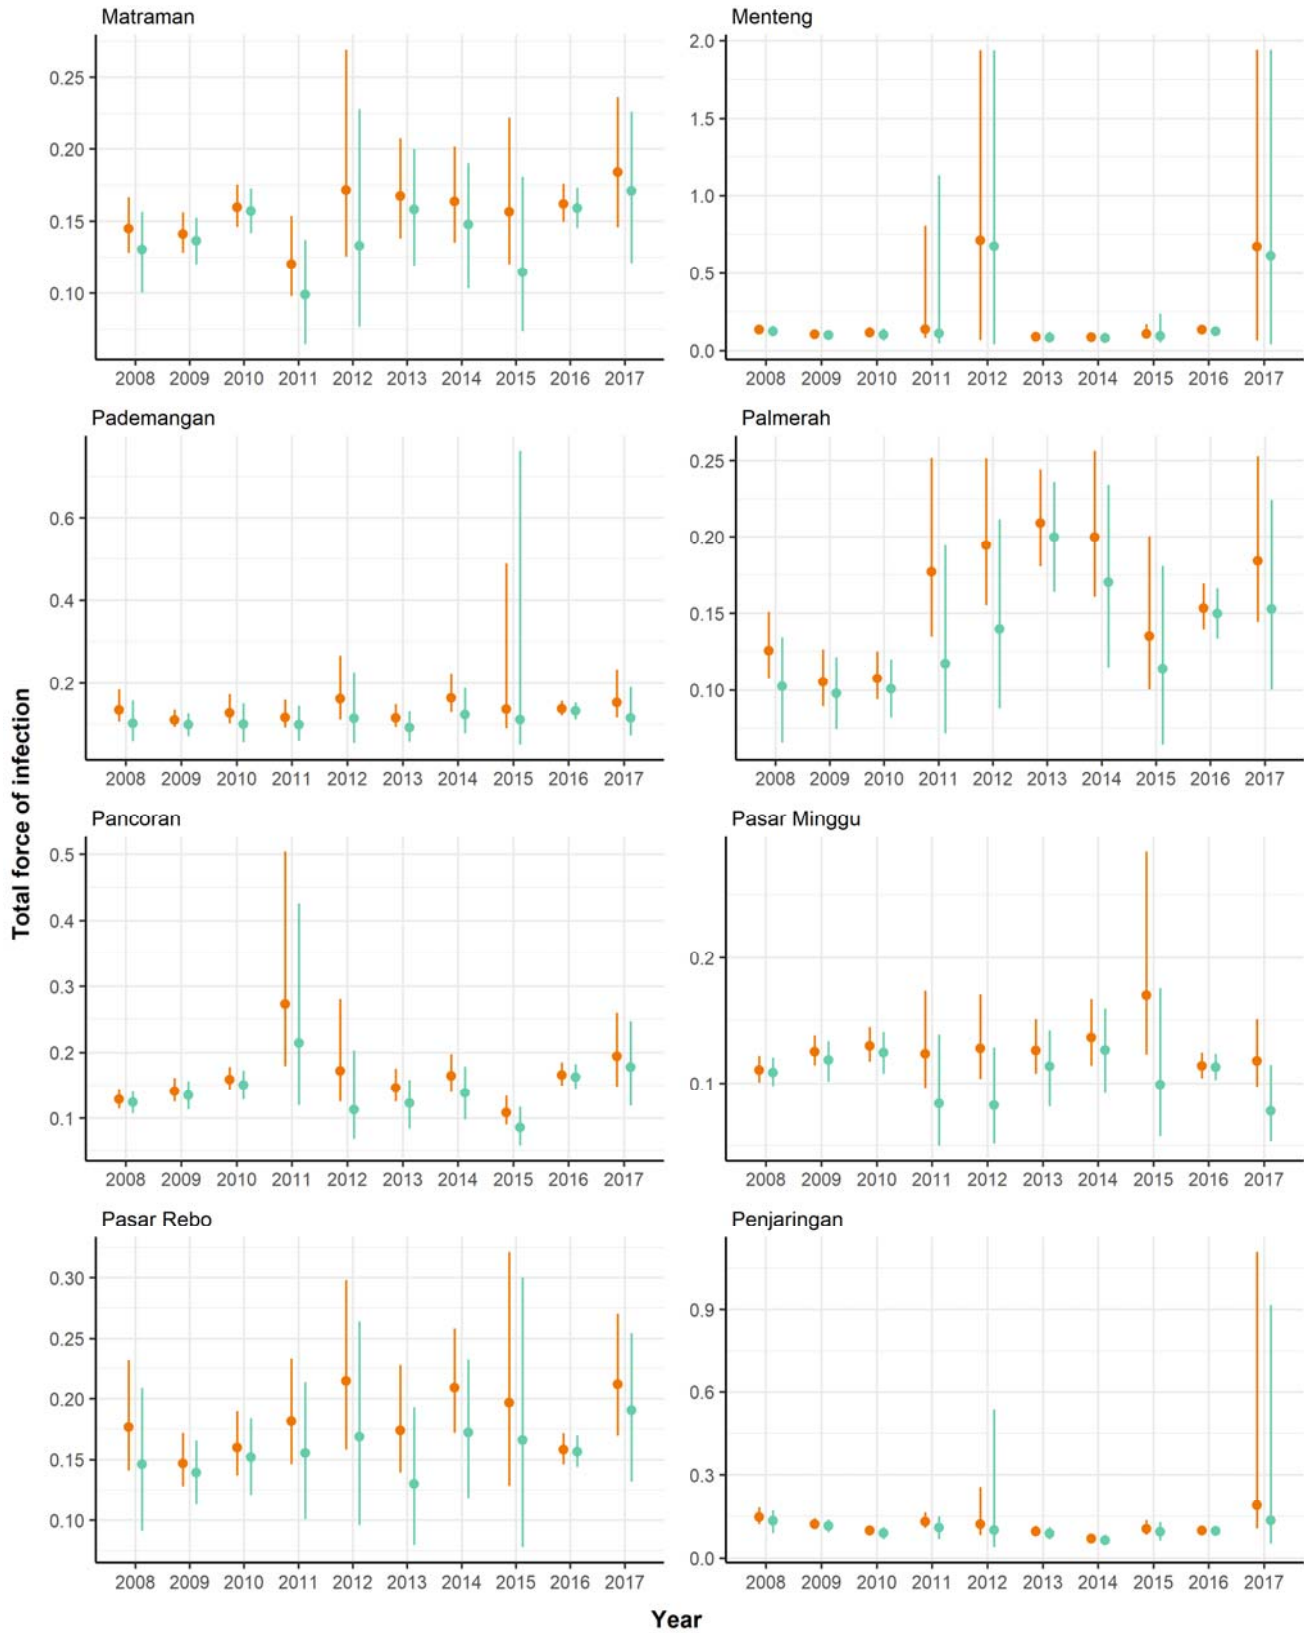



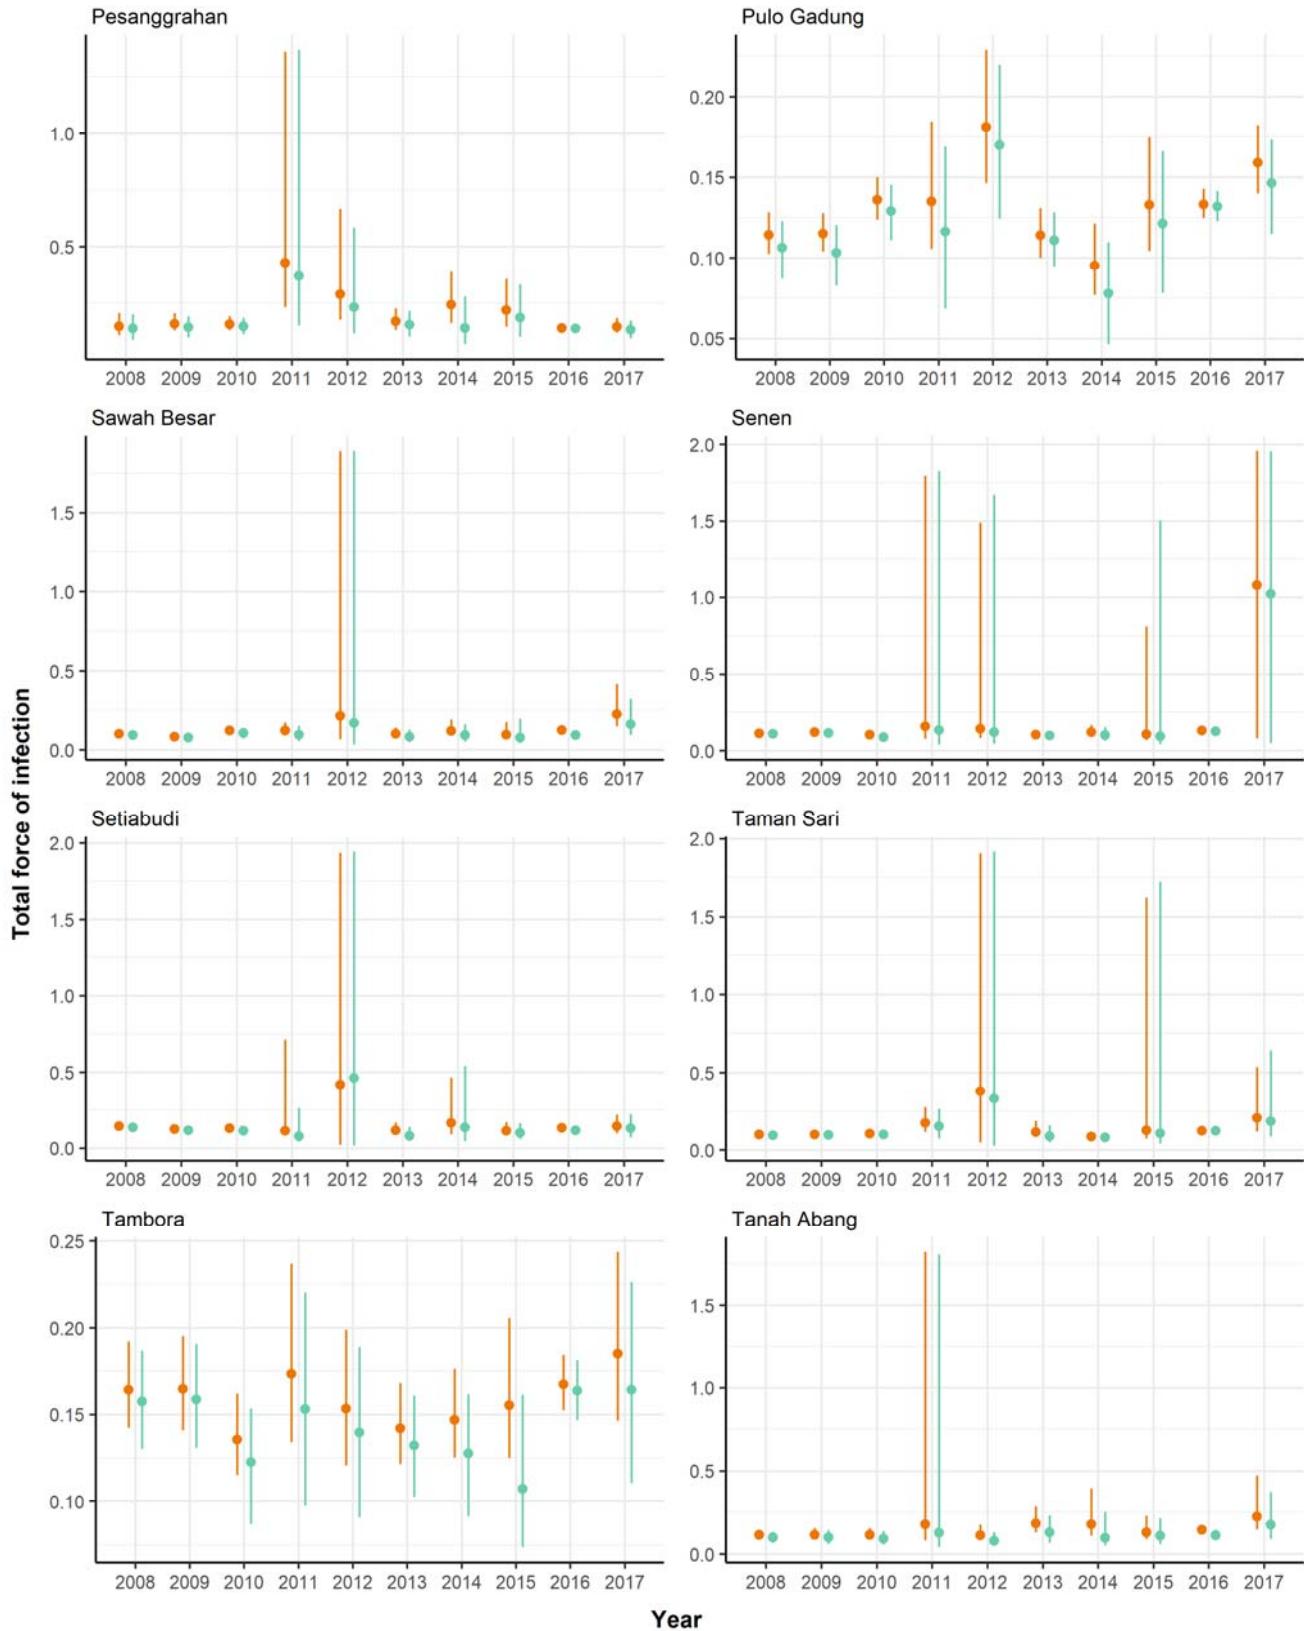

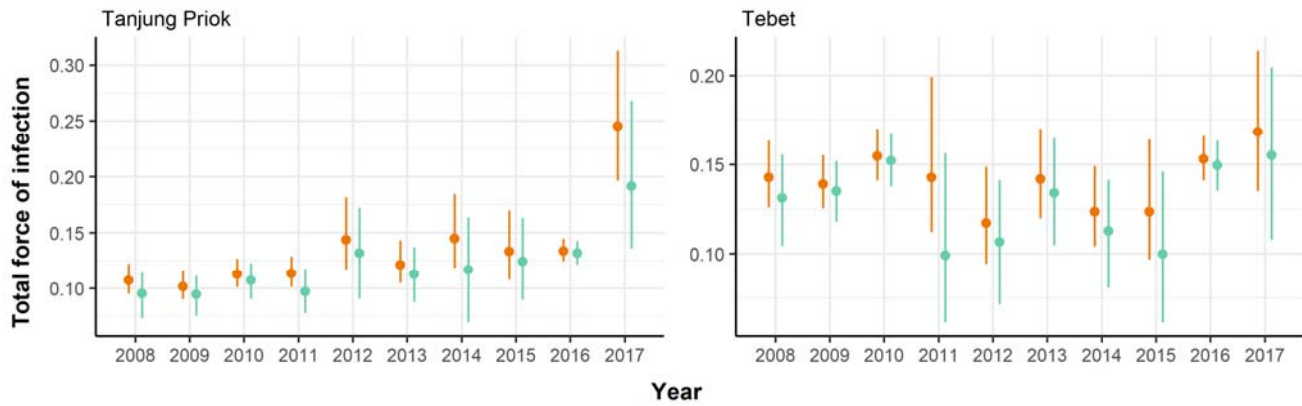

**Figure S8.** Mean (blue line) and 95% confidence interval (grey shading) of linear regression model between average annual subdistrict total force of infection ( $4\lambda$ ) estimates (obtained from the fit of model variant *PS* to cumulative age-stratified DHF incidence rates reported in 2008-2017) and subdistrict population density estimates (available online (2)). Adjusted  $R^2=0.049$ ,  $P=0.086$ .

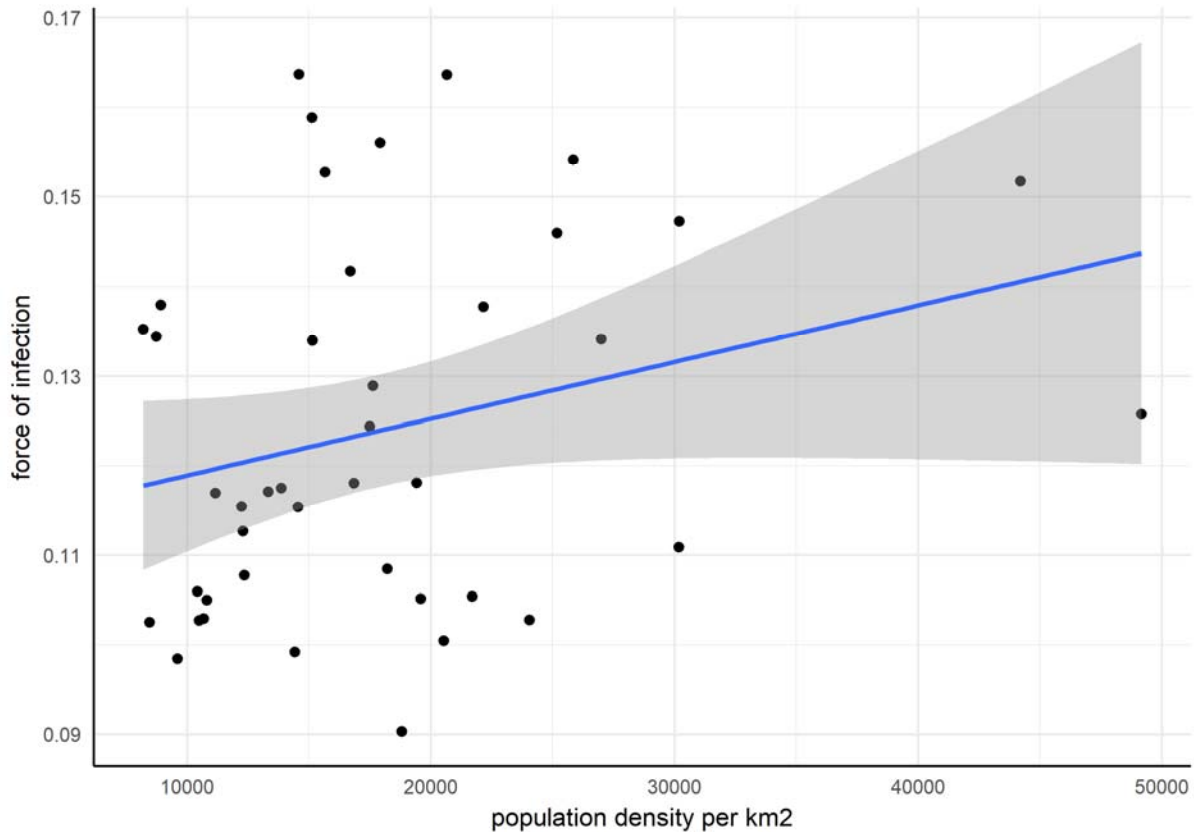

## 5. References

1. Subdin Kesehatan Masyarakat, Seksi Surveilans Epidemiologi [Internet]. [cited 2018 Feb 2]. Available from: <http://www.surveilans-dinkesdki.net/>
2. City Population Statistics [Internet]. [cited 2017 Jul 4]. Available from: <http://www.citypopulation.de/Indonesia.html>
